# Supplementary material for: Scientific publications in nursing journals from Mainland China, Taiwan, and Hong Kong: a 10-year survey of the literature
Source: PeerJ. 2016 Mar 14;4:e1798. doi: 10.7717/peerj.1798 (PMC4793333; doi:10.7717/peerj.1798)
Supplement: Supplemental Information 1 — Raw data of the manuscript. [file peerj-04-1798-s001.xlsx]

## Sheet: Journals(110)
Rank	IF	abbr	full name	language
1	2.901	INT J NURS STUD	INTERNATIONAL JOURNAL OF NURSING STUDIES	English
2	2.788	ONCOL NURS FORUM	ONCOLOGY NURSING FORUM	English
3	2.381	WORLDV EVID-BASED NU	Worldviews on Evidence-Based Nursing	English
4	2.115	AM J CRIT CARE	AMERICAN JOURNAL OF CRITICAL CARE	English
5	2.053	J CARDIOVASC NURS	Journal of Cardiovascular Nursing	English
6	1.985	J HUM LACT	JOURNAL OF HUMAN LACTATION	English
7	1.966	CANCER NURS	CANCER NURSING	English
8	1.95	INT J MENT HEALTH NU	International Journal of Mental Health Nursing	English
9	1.876	EUR J CARDIOVASC NUR	European Journal of Cardiovascular Nursing	English
10	1.741	J ADV NURS	JOURNAL OF ADVANCED NURSING	English
11	1.636	J NURS SCHOLARSHIP	JOURNAL OF NURSING SCHOLARSHIP	English
12	1.588	NURS OUTLOOK	NURSING OUTLOOK	English
13	1.573	MIDWIFERY	MIDWIFERY	English
14	1.573	WOMEN BIRTH	Women and Birth	English
15	1.564	EUR J CANCER CARE	EUROPEAN JOURNAL OF CANCER CARE	English
16	1.562	AUST CRIT CARE	Australian Critical Care	English
17	1.556	CRIT CARE NURSE	Critical Care Nurse	English
18	1.529	PAIN MANAG NURS	Pain Management Nursing	English
19	1.5	J NURS MANAGE	Journal of Nursing Management	English
20	1.44	J PEDIATR HEALTH CAR	Journal of Pediatric Health Care	English
21	1.439	NURS INQ	Nursing Inquiry	English
22	1.427	BIOL RES NURS	Biological Research for Nursing	English
23	1.426	EUR J ONCOL NURS	European Journal of Oncology Nursing	English
24	1.389	J NURS CARE QUAL	JOURNAL OF NURSING CARE QUALITY	English
25	1.356	NURS EDUC TODAY	NURSE EDUCATION TODAY	English
26	1.356	NURS RES	NURSING RESEARCH	English
27	1.342	J FAM NURS	Journal of Family Nursing	English
28	1.298	AM J NURS	AMERICAN JOURNAL OF NURSING	English
29	1.29	HEART LUNG	HEART & LUNG	English
30	1.278	CLIN NURS RES	Clinical Nursing Research	English
31	1.274	J ASSOC NURSE AIDS C	JANAC-JOURNAL OF THE ASSOCIATION OF NURSES IN AIDS CARE	English
32	1.273	J NURS ADMIN	JOURNAL OF NURSING ADMINISTRATION	English
33	1.267	RES NURS HEALTH	RESEARCH IN NURSING & HEALTH	English
34	1.264	BIRTH-ISS PERINAT C	BIRTH-ISSUES IN PERINATAL CARE	English
35	1.255	J CLIN NURS	JOURNAL OF CLINICAL NURSING	English
36	1.247	NURS ETHICS	NURSING ETHICS	English
37	1.225	AUST J RURAL HEALTH	Australian Journal of Rural Health	English
38	1.2	GERIATR NURS	GERIATRIC NURSING	English
39	1.177	J WOUND OSTOMY CONT	Journal of Wound Ostomy and Continence Nursing	English
40	1.175	COLLEGIAN	Collegian	English
41	1.153	REHABIL NURS	Rehabilitation Nursing	English
42	1.129	J TISSUE VIABILITY	Journal of Tissue Viability	English
43	1.122	ADV NEONAT CARE	Advances in Neonatal Care	English
44	1.112	J SCH NURS	Journal of School Nursing	English
45	1.106	ADV SKIN WOUND CARE	Advances in Skin & Wound Care	English
46	1.1	J PERINAT NEONAT NUR	JOURNAL OF PERINATAL & NEONATAL NURSING	English
47	1.067	J MIDWIFERY WOM HEAL	JOURNAL OF MIDWIFERY & WOMENS HEALTH	English
48	1.042	NURS HEALTH SCI	Nursing & Health Sciences	English
49	1.032	WESTERN J NURS RES	WESTERN JOURNAL OF NURSING RESEARCH	English
50	1.024	J GERONTOL NURS	Journal of Gerontological Nursing	English
51	1.024	JOGNN-J OBST GYN NEO	JOGNN-JOURNAL OF OBSTETRIC GYNECOLOGIC AND NEONATAL NURSING	English
52	1.017	J AM ACAD NURSE PRAC	Journal of the American Academy of Nurse Practitioners	English
53	1.006	J PEDIATR NURS	Journal of Pediatric Nursing-Nursing Care of Children & Families	English
54	1	ASIAN NURS RES	Asian Nursing Research	English
55	0.986	CLIN NURSE SPEC	Clinical Nurse Specialist	English
56	0.977	J AM PSYCHIAT NURSES	Journal of the American Psychiatric Nurses Association	English
57	0.97	J NURS RES	Journal of Nursing Research	English
58	0.948	INT NURS REV	INTERNATIONAL NURSING REVIEW	English
59	0.945	J PROF NURS	JOURNAL OF PROFESSIONAL NURSING	English
60	0.943	J PERIANESTH NURS	Journal of PeriAnesthesia Nursing	English
61	0.923	J SPEC PEDIATR NURS	Journal for Specialists in Pediatric Nursing	English
62	0.91	CLIN J ONCOL NURS	Clinical Journal of Oncology Nursing	English
63	0.91	J NURS EDUC	JOURNAL OF NURSING EDUCATION	English
64	0.903	J PEDIATR ONCOL NURS	Journal of Pediatric Oncology Nursing	English
65	0.898	MCN-AM J MATERN-CHIL	MCN-The American Journal of Maternal-Child Nursing	English
66	0.875	J CHILD HEALTH CARE	Journal of Child Health Care	English
67	0.852	ARCH PSYCHIAT NURS	ARCHIVES OF PSYCHIATRIC NURSING	English
68	0.844	J PSYCHIATR MENT HLT	Journal of Psychiatric and Mental Health Nursing	English
69	0.839	NURS CLIN N AM	NURSING CLINICS OF NORTH AMERICA	English
70	0.833	NURS PHILOS	Nursing Philosophy	English
71	0.833	PUBLIC HEALTH NURS	PUBLIC HEALTH NURSING	English
72	0.827	ADV NURS SCI	ADVANCES IN NURSING SCIENCE	English
73	0.815	J NEUROSCI NURS	JOURNAL OF NEUROSCIENCE NURSING	English
74	0.797	NURS ECON	NURSING ECONOMICS	English
75	0.787	J EMERG NURS	Journal of Emergency Nursing	English
76	0.733	APPL NURS RES	APPLIED NURSING RESEARCH	English
77	0.723	J PSYCHOSOC NURS MEN	JOURNAL OF PSYCHOSOCIAL NURSING AND MENTAL HEALTH SERVICES	English
78	0.719	CIN-COMPUT INFORM NU	CIN-COMPUTERS INFORMATICS NURSING	English
79	0.705	NURS SCI QUART	NURSING SCIENCE QUARTERLY	English
80	0.703	INT EMERG NURS	International Emergency Nursing	English
81	0.688	GASTROENTEROL NURS	Gastroenterology Nursing	English
82	0.67	NURS EDUC	Nurse Educator	English
83	0.659	J TRANSCULT NURS	Journal of Transcultural Nursing	English
84	0.651	PERSPECT PSYCHIATR C	PERSPECTIVES IN PSYCHIATRIC CARE	English
85	0.65	CONTEMP NURSE	Contemporary Nurse	English
86	0.646	NURS CRIT CARE	Nursing in Critical Care	English
87	0.643	RES GERONTOL NURS	Research in Gerontological Nursing	English
88	0.622	HOLIST NURS PRACT	Holistic Nursing Practice	English
89	0.615	NEPHROL NURS J	Nephrology Nursing Journal	English
90	0.599	INT J NURS PRACT	International Journal of Nursing Practice	English
91	0.564	WORKPLACE HEALTH SAF	Workplace Health & Safety	English
92	0.561	ORTHOP NURS	Orthopaedic Nursing	English
93	0.534	REV LAT-AM ENFERM	Revista Latino-Americana de Enfermagem	English
94	0.519	J CONTIN EDUC NURS	JOURNAL OF CONTINUING EDUCATION IN NURSING	English
95	0.488	CRIT CARE NURS CLIN	Critical Care Nursing Clinics of North America	English
96	0.475	J COMMUN HEALTH NURS	Journal of Community Health Nursing	English
97	0.453	J ADDICT NURS	Journal of Addictions Nursing	English
98	0.452	REV ESC ENFERM USP	Revista da Escola de Enfermagem da USP	PORTUGUESE
99	0.439	J HOSP PALLIAT NURS	Journal of Hospice & Palliative Nursing	English
100	0.404	INT J NURS KNOWL	International Journal of Nursing Knowledge	English
101	0.388	JPN J NURS SCI	Japan Journal of Nursing Science	English
102	0.38	J KOREAN ACAD NURS	Journal of Korean Academy of Nursing	KOREAN
103	0.364	RES THEOR NURS PRACT	Research and Theory for Nursing Practice	English
104	0.315	ASSIST INFERM RIC	Assistenza Infermieristica e Ricerca	ITALIAN
105	0.298	ACTA PAUL ENFERM	Acta Paulista de Enfermagem	PORTUGUESE
106	0.22	AUST J ADV NURS	Australian Journal of Advanced Nursing	English
107	0.218	PFLEGE	Pflege	GERMAN
108	0.15	BARIATR SURG PRACT P	Bariatric Surgical Practice and Patient Care	English
109	0.115	BARIAT NURS SURG PAT	Bariatric Nursing and Surgical Patient Care	English
110	0	J AM ASSOC NURSE PRA	Journal of the American Association of Nurse Practitioners	English

## Sheet: Mainland(438)
PT	AU	BA	BE	GP	AF	BF	CA	TI	SO	SE	BS	LA	DT	CT	CY	CL	SP	HO	DE	ID	AB	C1	RP	EM	RI	OI	FU	FX	CR	NR	TC	Z9	PU	PI	PA	SN	EI	BN	J9	JI	PD	PY	VL	IS	PN	SU	SI	MA	BP
J	Ding, Y; Zhu, YL; Zhang, MF				Ding, Yan; Zhu, Yan-Li; Zhang, Mei-Feng			Quality of life of Chinese patients with ovarian malignancies during chemotherapy under condition of no recurrence	CANCER NURSING			English	Article						chemotherapy; ovarian cancer; ovarian malignancies; quality of life; social support	FACT-G SCALE; FUNCTIONAL-ASSESSMENT; GYNECOLOGIC CANCER; SOCIAL SUPPORT; RECEIVING CHEMOTHERAPY; CERVICAL-CANCER; BREAST-CANCER; WOMEN; RADIOTHERAPY; VALIDATION	The purpose of this study was to describe the quality of life of patients with ovarian malignancies during chemotherapy under condition of no recurrence and to explore changes in quality of life during chemotherapy and factors associated with quality of life. It was a cohort study during treatment. Quality of life of 75 patients with ovarian malignancies at baseline, reduced to 63 and 61 patients…	Fudan Univ, Obstet & Gynecol Hosp, Dept Nursing, Shanghai 200011, Peoples R China; Sun Yat Sen Univ, Sch Nursing, Guangzhou, Peoples R China	Ding, Y (reprint author), Fudan Univ, Obstet & Gynecol Hosp, Dept Nursing, 419 Fangxie Rd, Shanghai 200011, Peoples R China.	jonish@vip.sina.com						46	6	7	LIPPINCOTT WILLIAMS & WILKINS	PHILADELPHIA	530 WALNUT ST, PHILADELPHIA, PA 19106-3621 USA	0162-220X			CANCER NURS	Cancer Nurs.	MAY-JUN	2007	30	3					243
J	Ding, Y; Zhang, MF; Zhu, YL				Ding, Yan; Zhang, Mei-Feng; Zhu, Yan-Li			Social support of Chinese patients with ovarian malignancies during chemotherapy: A cohort questionnaire survey	INTERNATIONAL JOURNAL OF NURSING STUDIES			English	Article						social support; ovarian malignancies; chemotherapy	QUALITY-OF-LIFE; BREAST-CANCER; GYNECOLOGIC CANCER; CERVICAL-CANCER; WOMEN; RADIOTHERAPY; SYMPTOMS; NETWORKS; HEALTH; SCALE	Objectives: To describe the social support of patients with ovarian malignancies during chemotherapy and to explore changes over time and factors associated with social support. Methods: Longitudinal Cohort study of 75 patients undergoing chemotherapy for ovarian malignancies using the Perceived Social Support Scale (PSSS). Results: At the first and third time point, all the subjects had average …	[Ding, Yan] Fudan Univ, Dept Nursing, Obstet & Gynecol Hosp, Shanghai 200433, Peoples R China; [Zhang, Mei-Feng; Zhu, Yan-Li] Sun Yat Sen Univ, Sch Nursing, Guangzhou 510275, Guangdong, Peoples R China	Ding, Y (reprint author), Fudan Univ, Dept Nursing, Obstet & Gynecol Hosp, Shanghai 200433, Peoples R China.	jonish@vip.silia.com						39	6	6	PERGAMON-ELSEVIER SCIENCE LTD	OXFORD	THE BOULEVARD, LANGFORD LANE, KIDLINGTON, OXFORD OX5 1GB, ENGLAND	0020-7489			INT J NURS STUD	Int. J. Nurs. Stud.	AUG	2008	45	8					1205
J	Yuan, CR; Wang, ZH; Chen, GL; Liu, L; Liu, XR				Yuan, Changrong; Wang, Zhihong; Chen, Guoliang; Liu, Lin; Liu, Xiaorong			An International Comparative Study of Professional Development in Research	JOURNAL OF CONTINUING EDUCATION IN NURSING			English	Article							NURSES; DEPRESSION; CESSATION; WOMEN; LIFE	In 2005, a group of researchers in China decided to compare the development of research in China with that of other countries. This article describes the process the authors used and the prevalent topics for trends and developments. Further ideas for their own professional development in research are defined. Contin Educ Nurs 2008;39(9):427-431.	[Yuan, Changrong; Wang, Zhihong; Liu, Xiaorong] Second Mil Med Univ, Sch Nursing, Shanghai 200433, Peoples R China; [Yuan, Changrong] Nursing Journal Chinese Peoples Liberat Army, Shanghai, Peoples R China	Liu, XR (reprint author), Second Mil Med Univ, Sch Nursing, 800 Xiangying Rd, Shanghai 200433, Peoples R China.							18	0	0	SLACK INC	THOROFARE	6900 GROVE RD, THOROFARE, NJ 08086 USA	0022-0124	1938-2472		J CONTIN EDUC NURS	J. Contin. Educ. Nursing	SEP	2008	39	9					427
J	Wan, HW; Yu, F; Kolanowski, A				Wan, Hongwei; Yu, Fang; Kolanowski, Ann			Caring for aging Chinese: Lessons learned from the United States	JOURNAL OF TRANSCULTURAL NURSING			English	Article						aging population; gerontological nursing; China; Chinese; community-based care; health care system	OLDER-ADULTS; COMMUNITY; HEALTH; CARE; SYSTEM	After two birth peaks and the "one child per family" policy, China is facing unprecedented challenges with regard to its aging population. This article analyzes the problems associated with three traditional ways of caring for older Chinese, the current health care system, and social supports available to older Chinese. The "4-2-1" family structure and the "empty nest" undermine family support, t…	[Wan, Hongwei] Shanghai Jiao Tong Univ, Sch Nursing, Shanghai, Peoples R China; [Yu, Fang] Univ Minnesota, Sch Nursing, Minneapolis, MN 55455 USA; [Kolanowski, Ann] Penn State Univ, Sch Nursing, University Pk, PA 16802 USA	Wan, HW (reprint author), Shanghai Jiao Tong Univ, Sch Nursing, Shanghai, Peoples R China.							43	7	7	SAGE PUBLICATIONS INC	THOUSAND OAKS	2455 TELLER RD, THOUSAND OAKS, CA 91320 USA	1043-6596			J TRANSCULT NURS	J. Transcult. Nurs.	APR	2008	19	2					114
J	Yuan, H; Williams, BA; Fan, L				Yuan, Haobin; Williams, Beverly A.; Fan, Lin			A systematic review of selected evidence on developing nursing students' critical thinking through problem-based learning	NURSE EDUCATION TODAY			English	Review						problem-based learning; critical thinking; nursing education; systematic review		Rapidly changing developments and expanding roles in healthcare environment requires professional nurses to develop critical thinking. Nursing education strives to facilitate students' critical thinking through the appropriate instructional approaches. Problem-based learning (PBL) is a student-centered approach to learning which enables the students to work cooperatively in small groups for seeki…	[Yuan, Haobin] Fudan Univ, Sch Nursing, Shanghai 200433, Peoples R China; [Williams, Beverly A.] Univ Alberta, Fac Nursing, Edmonton, AB, Canada; [Fan, Lin] China Med Univ, Affiliated Hosp 2, Shengjing Hosp, Shenyang, Peoples R China	Yuan, H (reprint author), Fudan Univ, Sch Nursing, Shanghai 200433, Peoples R China.	haobinyuan@fudan.edu.cn; beverly.williams@ualberta.ca; Fanl@cmu2h.org						22	32	35	CHURCHILL LIVINGSTONE	EDINBURGH	JOURNAL PRODUCTION DEPT, ROBERT STEVENSON HOUSE, 1-3 BAXTERS PLACE, LEITH WALK, EDINBURGH EH1 3AF, MIDLOTHIAN, SCOTLAND	0260-6917			NURS EDUC TODAY	Nurse Educ. Today	AUG	2008	28	6					657
J	Yuan, HB; Kunaviktikul, W; Klunklin, A; Williams, BA				Yuan, Haobin; Kunaviktikul, Wipada; Klunklin, Areewan; Williams, Beverly A.			Improvement of nursing students' critical thinking skills through problem-based learning in the People's Republic of China: A quasi-experimental study	NURSING & HEALTH SCIENCES			English	Article						China; critical thinking skills; improvement; nursing student; problem-based learning		A quasi-experimental, two-group pretest-post-test design was conducted to examine the effect of problem-based learning on the critical thinking skills of 46 Year 2 undergraduate nursing students in the People's Republic of China. The California Critical Thinking Skills Test Form A, Chinese-Taiwanese version was used as both a pretest and as a post-test for a semester-long nursing course. There wa…	[Yuan, Haobin] Fudan Univ, Sch Nursing, Shanghai 200032, Peoples R China; [Yuan, Haobin; Kunaviktikul, Wipada; Klunklin, Areewan] Chiang Mai Univ, Fac Nursing, Chiang Mai 50000, Thailand; [Williams, Beverly A.] Univ Alberta, Fac Nursing, Edmonton, AB, Canada	Yuan, HB (reprint author), Fudan Univ, Sch Nursing, 305 Fenglin Rd, Shanghai 200032, Peoples R China.	haobinfriend@163.com						20	15	15	BLACKWELL PUBLISHING	OXFORD	9600 GARSINGTON RD, OXFORD OX4 2DQ, OXON, ENGLAND	1441-0745			NURS HEALTH SCI	Nurs. Health Sci.	MAR	2008	10	1					70
J	Liu, L; Yuan, CR				Liu, Lin; Yuan, Changrong			Construction of Palliative Care Training Contents in China: A Delphi Study	CANCER NURSING			English	Article						Chinese nurses; Delphi study; Palliative care; Training contents	CANCER	There is a growing emphasis on improving the quality of ending life in China today; however, Chinese professional nursing education in palliative care is limited and inconsistent, and there are no standardized formal training contents. There is a need to construct a related training mode to help Chinese nurses to improve their quality of palliative care. The objective of this study was to constru…	[Liu, Lin; Yuan, Changrong] Second Mil Med Univ, Coll Nursing, Shanghai 200433, Peoples R China	Yuan, CR (reprint author), Second Mil Med Univ, Coll Nursing, 800 Xiangying Rd, Shanghai 200433, Peoples R China.	yuancr510@yahoo.com.cn			Shanghai Leading Academic Discipline Project, China [B903]	This study was supported by Shanghai Leading Academic Discipline Project, China. Project Number: B903.		31	4	4	LIPPINCOTT WILLIAMS & WILKINS	PHILADELPHIA	530 WALNUT ST, PHILADELPHIA, PA 19106-3621 USA	0162-220X	1538-9804		CANCER NURS	Cancer Nurs.	NOV-DEC	2009	32	6					446
J	Sah, BK; Zhu, ZG; Wang, XY; Yang, QM; Chen, MM; Xiang, M; Chen, J; Yan, M				Sah, B. K.; Zhu, Z. G.; Wang, X. Y.; Yang, Q. M.; Chen, M. M.; Xiang, M.; Chen, J.; Yan, M.			Post-operative complications of gastric cancer surgery: female gender at high risk	EUROPEAN JOURNAL OF CANCER CARE			English	Article						post-operative complications; gastric cancer; POSSUM; gender difference	ANASTOMOTIC LEAKAGE; TRAUMA-HEMORRHAGE; SUBSEQUENT SEPSIS; ANTERIOR RESECTION; IMMUNE FUNCTIONS; RECTAL-CANCER; SEX-HORMONES; MORTALITY; MALES; GASTRECTOMY	We applied physiological and operative severity score for the enumeration of morbidity and mortality (POSSUM) to evaluate overall surgical outcome and investigated the role of gender for early post-operative complications in gastric cancer surgery. The data from a total of 357 patients of gastric cancer were analysed by univariate and multivariate analysis. Post-operative complications were recor…	[Sah, B. K.; Zhu, Z. G.; Wang, X. Y.; Yang, Q. M.; Chen, M. M.; Xiang, M.; Chen, J.; Yan, M.] Shanghai Jiao Tong Univ, Dept Gen Surg, Rui Jin Hosp, Shanghai Inst Digest Surg,Sch Med, Shanghai 200025, Peoples R China	Zhu, ZG (reprint author), Shanghai Jiao Tong Univ, Dept Gen Surg, Rui Jin Hosp, Shanghai Inst Digest Surg,Sch Med, 197 Rui Jin Er Rd, Shanghai 200025, Peoples R China.	rjzhuzhenggang@hotmail.com			Shanghai Institute of Digestive Surgery	The authors thank the Shanghai Institute of Digestive Surgery for funding this research; Dr Miao Qiong for her assistance in the designing of data collection charts; Mr. Dipendra Kumar Sah, computer engineer for designing a special POSSUM calculator and database programme; the statistic bureau of Rui Jin Hospital for providing records of patients; Mr. Sun Jing Jian, officer of patient record, for…		39	6	10	WILEY-BLACKWELL PUBLISHING, INC	MALDEN	COMMERCE PLACE, 350 MAIN ST, MALDEN 02148, MA USA	0961-5423			EUR J CANCER CARE	Eur. J. Cancer Care	MAR	2009	18	2					202
J	Cao, J; Ye, WQ; Zhang, LJ; Lu, XY; Sun, Y				Cao, Jie; Ye, Wenqin; Zhang, Lingjuan; Lu, Xiaoying; Sun, Yan			Clinical Nursing System and Staff Composition in Shanghai	JOURNAL OF NURSING ADMINISTRATION			English	Article									[Ye, Wenqin] Nurses Assoc Shanghai, Shanghai 200040, Peoples R China; [Cao, Jie; Ye, Wenqin; Zhang, Lingjuan; Lu, Xiaoying; Sun, Yan] Second Mil Med Univ, Changhai Hosp Affiliated, Dept Nursing, Shanghai 200433, Peoples R China	Ye, WQ (reprint author), Nurses Assoc Shanghai, 1623, Shanghai 200040, Peoples R China.	celion2004@hotmail.com						0	4	4	LIPPINCOTT WILLIAMS & WILKINS	PHILADELPHIA	530 WALNUT ST, PHILADELPHIA, PA 19106-3621 USA	0002-0443	1539-0721		J NURS ADMIN	J. Nurs. Adm.	MAR	2009	39	3					113
J	Ji, QA; Mei, YQ; Wang, XS; Feng, J; Cai, JZ; Sun, YF; Chi, LJ				Ji, Qiang; Mei, Yunqing; Wang, Xisheng; Feng, Jing; Cai, Jiangzhi; Sun, Yifeng; Chi, Liangjie			Impact of diabetes mellitus on patients over 70 years of age undergoing coronary artery bypass grafting	HEART & LUNG			English	Article							SURGERY; RISK; MORTALITY; REVASCULARIZATION; INTERVENTION; MANAGEMENT; DISEASE; TERM	OBJECTIVE: We evaluated in-hospital outcomes of diabetic and nondiabetic patients aged over 70 years after isolated coronary artery bypass grafting (CABG). PATIENTS AND SETTING: All patients aged over 70 years at our center, who underwent CABG between January 2003 and December 2008, were entered into this study. Diabetes in this study was defined as the need for oral medication or insulin. METHOD…	[Ji, Qiang; Mei, Yunqing; Wang, Xisheng; Feng, Jing; Cai, Jiangzhi; Sun, Yifeng] Tongji Univ, Dept Cardiovasc Thorac Surg, Tongji Hosp, Shanghai 200065, Peoples R China; [Chi, Liangjie] Tongji Univ, Sch Med, Shanghai 200065, Peoples R China	Mei, YQ (reprint author), Tongji Univ, Dept Cardiovasc Thorac Surg, Tongji Hosp, 389 Xincun Rd, Shanghai 200065, Peoples R China.	rabbitmei2000@yahoo.com.cn						21	1	1	MOSBY-ELSEVIER	NEW YORK	360 PARK AVENUE SOUTH, NEW YORK, NY 10010-1710 USA	0147-9563			HEART LUNG	Heart Lung	SEP-OCT	2010	39	5					404
J	Ji, QA; Chi, LJ; Mei, YQ; Wang, XS; Peng, J; Cai, JZ; Sun, YF				Ji, Qiang; Chi, Liangjie; Mei, Yunqing; Wang, Xisheng; Peng, Jing; Cai, Jiangzhi; Sun, Yifeng			Risk factors for late extubation after coronary artery bypass grafting	HEART & LUNG			English	Article							CARDIOPULMONARY BYPASS; INFLAMMATORY RESPONSE; SURGERY; RATES; SCORE	OBJECTIVE: To evaluate the independent risk factors for late extubation after coronary artery bypass grafting (CABG). METHODS: Preoperative, intraoperative, and postoperative characteristics of patients undergoing isolated CABG between June 2005 and June 2008 at the Tongji Hospital were retrospectively analyzed. Elapsed time between CABG and extubation of more than 8 hours was defined as late ext…	[Ji, Qiang; Mei, Yunqing; Wang, Xisheng; Peng, Jing; Cai, Jiangzhi; Sun, Yifeng] Tongji Univ, Tongji Hosp, Dept Cardiovasc Thorac Surg, Shanghai 200065, Peoples R China; [Chi, Liangjie] Tongji Univ, Sch Med, Shanghai 200065, Peoples R China	Mei, YQ (reprint author), Tongji Univ, Tongji Hosp, Dept Thoracocardiovasc Surg, 389 Xincun Rd, Shanghai 200065, Peoples R China.	jiqiang1977@yahoo.com.cn; drmeiyq2004@tongji.edu.cn						21	3	3	MOSBY-ELSEVIER	NEW YORK	360 PARK AVENUE SOUTH, NEW YORK, NY 10010-1710 USA	0147-9563			HEART LUNG	Heart Lung	JUL-AUG	2010	39	4					275
J	Wu, BW; Yin, T; Cao, WX; Gu, ZD; Wang, XJ; Yan, M; Liu, BY				Wu, Beiwen; Yin, Tao (Tracy); Cao, Weixin; Gu, Zhi Dong; Wang, Xiaojin; Yan, Min; Liu, Bingya			Validation of the Chinese version of the Subjective Global Assessment scale of nutritional status in a sample of patients with gastrointestinal cancer	INTERNATIONAL JOURNAL OF NURSING STUDIES			English	Article						Subjective Global Assessment (SGA); Gastrointestinal cancer; Nutritional assessment; Prognosis prediction	BODY-MASS INDEX; HOSPITAL STAY; GERIATRIC-PATIENTS; COLORECTAL-CANCER; MALNUTRITION; DIALYSIS; SGA; COMPLICATIONS; MORTALITY; DISEASE	Background and aims: To verify the validity of the Subjective Global Assessment (SGA) on the nutritional assessment and prognosis prediction in Chinese patients with gastrointestinal cancer. Methods: Five hundred and five patients with newly diagnosed gastrointestinal cancer who underwent Surgeries were enrolled between August 2004 and August 2006. The sample consisted of 307 males (60.8%) and 19…	[Wu, Beiwen; Cao, Weixin] Shanghai Jiao Tong Univ, Sch Med, Ruijin Hosp, Dept Clin Nutr, Shanghai 200025, Peoples R China; [Wu, Beiwen; Yin, Tao (Tracy)] Shanghai Jiao Tong Univ, Sch Nursing, Shanghai 200025, Peoples R China; [Gu, Zhi Dong] Shanghai Jiao Tong Univ, Sch Med, Ruijin Hosp, Dept Clin Lab, Shanghai 200025, Peoples R China; [Wang, Xiaojin] Shanghai Jiao Tong Univ, Sch Basic Med Sci, De…	Cao, WX (reprint author), Shanghai Jiao Tong Univ, Sch Med, Ruijin Hosp, Dept Clin Nutr, Shanghai 200025, Peoples R China.	Gaoan2005@yahoo.com.cn			Shanghai Municipal Health Bureau Foundation [054049]	The authors would like to thank all the nurses and patients who participated in the study. This study was financially supported by Shanghai Municipal Health Bureau Foundation (054049). The specific contribution of each author was the following: Cao WX came up with the original design study and worked as a study coordinator. Wu BW, Cao WX and Yan M performed all the clinical investigations. Gu ZD …		44	4	6	PERGAMON-ELSEVIER SCIENCE LTD	OXFORD	THE BOULEVARD, LANGFORD LANE, KIDLINGTON, OXFORD OX5 1GB, ENGLAND	0020-7489	1873-491X		INT J NURS STUD	Int. J. Nurs. Stud.	MAR	2010	47	3					323
J	Wu, MS; Hsu, L; Zhang, BH; Shen, NP; Lu, H; Li, SJ				Wu, Meisi; Hsu, Lily; Zhang, Binghua; Shen, Nanping; Lu, Hong; Li, Sijian			The experiences of cancer-related fatigue among Chinese children with leukaemia: A phenomenological study	INTERNATIONAL JOURNAL OF NURSING STUDIES			English	Article						Child; Fatigue; Leukaemia; Qualitative research	QUALITY-OF-LIFE; PARENT; SYMPTOMS	Background: Although cancer-related fatigue has been given priority status for study in Western countries, unfortunately, it has not received enough attention in China. Based on a different cultural perspective, qualitative study regarding cancer-related fatigue in China can provide a cultural context for enriching the system of knowledge about fatigue. Objectives: To explore the real-life experi…	[Wu, Meisi; Zhang, Binghua; Shen, Nanping; Lu, Hong] Shanghai Childrens Med Ctr, Shanghai, Peoples R China; [Hsu, Lily] Shanghai Off, Project HOPE, Shanghai, Peoples R China; [Li, Sijian] Wuhan Univ, HOPE Sch Nursing, Wuhan, Peoples R China	Hsu, L (reprint author), Shanghai Childrens Med Ctr, Shanghai, Peoples R China.	lilyhsu@hopechina.com						25	3	3	PERGAMON-ELSEVIER SCIENCE LTD	OXFORD	THE BOULEVARD, LANGFORD LANE, KIDLINGTON, OXFORD OX5 1GB, ENGLAND	0020-7489			INT J NURS STUD	Int. J. Nurs. Stud.	JAN	2010	47	1					49
J	Du, S; Yuan, C				Du, S.; Yuan, C.			Evaluation of patient self-management outcomes in health care: a systematic review	INTERNATIONAL NURSING REVIEW			English	Review						Chronic Diseases; Evaluation System; Nursing; Patient Self-Management; Scales; Systematic Review	RANDOMIZED CONTROLLED-TRIAL; SOCIAL COGNITIVE THEORY; QUALITY-OF-LIFE; CHRONIC DISEASE; CHRONIC ILLNESS; CHRONIC PAIN; PROGRAM; EFFICACY; ARTHRITIS; PEOPLE	Background: The importance of self-management and its intervention for improving the ability and skill of self-management has been discussed in literatures. It is, however, unclear how to choose the fitted, objective and accurate evaluation system when assessing the outcome. Aim: The aim of this article was to establish a general evaluation system for skill and ability of self-management in chron…	[Du, S.; Yuan, C.] Second Mil Med Univ, Coll Nursing, Shanghai 200433, Peoples R China	Yuan, C (reprint author), Second Mil Med Univ, Coll Nursing, 800 Xiangying Rd, Shanghai 200433, Peoples R China.	yuancr510@yahoo.com.cn			Shanghai Leading Academic Discipline Project, China [B903]	This study was supported by the Shanghai Leading Academic Discipline Project, China. Project Number: B903.		41	14	15	WILEY-BLACKWELL	HOBOKEN	111 RIVER ST, HOBOKEN 07030-5774, NJ USA	0020-8132	1466-7657		INT NURS REV	Int. Nurs. Rev.	JUN	2010	57	2					159
J	Yun, H; Jie, S; Anli, JA				Yun, Hu; Jie, Shen; Anli, Jiang			Nursing shortage in China: State, causes, and strategy	NURSING OUTLOOK			English	Article							FACULTY SHORTAGE; MIGRATION; QUALITY; SYSTEM; CARE	This article describes the nursing shortage situation in China and the causes for it. China is a major donor of nurses to other parts of the world and this article discusses the solutions China has implemented to address its nursing shortage, and the challenges that it is currently facing. The strategies that have been employed include: improving the health care system, improving work cultures fo…	[Yun, Hu; Jie, Shen; Anli, Jiang] Second Mil Med Univ, Sch Nursing, Shanghai, Peoples R China	Anli, JA (reprint author), 800 Xiang Yin Rd, Shanghai 200433, Peoples R China.	alj1018@yahoo.com.cn			Foundation of Shanghai Key Discipline [B903]	This study was funded by the Foundation of Shanghai Key Discipline B903.		30	20	20	ELSEVIER SCIENCE INC	NEW YORK	360 PARK AVE SOUTH, NEW YORK, NY 10010-1710 USA	0029-6554	1528-3968		NURS OUTLOOK	Nurs. Outlook	MAY-JUN	2010	58	3					122
J	Hu, C; Zhou, LS				Hu, Chen; Zhou, Lanshu			Exercise Interventions for Upper-Limb Dysfunction Caused by Breast Cancer Treatment	CLINICAL JOURNAL OF ONCOLOGY NURSING			English	Review									[Hu, Chen; Zhou, Lanshu] Second Mil Med Univ, Sch Nursing, Clin Dept, Shanghai, Peoples R China	Zhou, LS (reprint author), Second Mil Med Univ, Sch Nursing, Clin Dept, Shanghai, Peoples R China.	lanshu1970@yahoo.com						1	0	0	ONCOLOGY NURSING SOC	PITTSBURGH	125 ENTERPRISE DR, PITTSBURGH, PA 15275 USA	1092-1095	1538-067X		CLIN J ONCOL NURS	Clin. J. Oncol. Nurs.	OCT	2011	15	5					569
J	Wan, HW; Hu, SQ; Thobaben, M; Hou, YW; Yin, T				Wan, Hongwei; Hu, Senqi; Thobaben, Marshelle; Hou, Yanwen; Yin, Tao			Continuous primary nursing care increases satisfaction with nursing care and reduces postpartum problems for hospitalized pregnant women	CONTEMPORARY NURSE			English	Article						continuous primary nursing care; task-centered nursing care; obstetric nursing; patient satisfaction; early postpartum health problem; pregnant woman; breastfeeding	HEALTH-PROBLEMS; CHILDBIRTH; PREVALENCE	Objective: To compare the differences in practicing continuous primary nursing care (CPNC) versus task-centered nursing care (TCNC) with regard to patient satisfaction with nursing care and early postpartum health problems for hospitalized pregnant women. Design: All participants filled out the satisfaction with nursing care questionnaire, breastfeeding knowledge questionnaire, and early postpart…	[Wan, Hongwei] Tongji Univ, Sch Med, Dept Nursing, Shanghai Matern & Infant Hosp 1, Shanghai 200092, Peoples R China; [Hu, Senqi] Humboldt State Univ, Dept Psychol, Arcata, CA 95521 USA; [Thobaben, Marshelle] Humboldt State Univ, Dept Nursing, Arcata, CA 95521 USA; [Hou, Yanwen] Tongji Univ, Sch Med, Dept Obstet, Shanghai Matern & Infant Hosp 1, Shanghai 200092, Peoples R China; [Yin, Tao] Shangh…	Wan, HW (reprint author), Tongji Univ, Sch Med, Dept Nursing, Shanghai Matern & Infant Hosp 1, Shanghai 200092, Peoples R China.				Shanghai Shen Kang Hospital Development Center [SHDC2008613]	We would like to thank the Shanghai Shen Kang Hospital Development Center, which provided funding for this study. The funding number is SHDC2008613.		15	3	3	ECONTENT MANAGEMENT	MALENY	PO BOX 1027, MALENY, QUEENSLAND 4552, AUSTRALIA	1037-6178			CONTEMP NURSE	Contemp. Nurse.	FEB	2011	37	2					149
J	Gao, WJ; Yuan, CR				Gao, W. J.; Yuan, C. R.			Self-management programme for cancer patients: a literature review	INTERNATIONAL NURSING REVIEW			English	Review						Cancer; Literature Review; Self-Management Programme	RANDOMIZED CONTROLLED-TRIAL; RECURRENT BREAST-CANCER; QUALITY-OF-LIFE; AUSTRALIAN EDUCATION; FAMILY INTERVENTION; PROSTATE-CANCER; SUPPORT PROGRAM; CHRONIC DISEASE; CLINICAL-TRIAL; WOMEN	Background: With increased cancer survivorship, cancer, in its chronic form, self-management among cancer patients has become an international research focus. Self-management programmes are used to guide the self-care process. Over the past 10 years, six self-management programmes for cancer patients (Taking CHARGE, Expert Patients Programme, Living with Cancer Education Program, Focus Program, P…	[Gao, W. J.; Yuan, C. R.] Second Mil Med Univ, Coll Nursing, Shanghai 200433, Peoples R China	Yuan, CR (reprint author), Second Mil Med Univ, Coll Nursing, 800 Xiangying Rd, Shanghai 200433, Peoples R China.	yuancr510@yahoo.com.cn			Shanghai Nature Science Grant [11ZR1447200]	This study was sponsored by Shanghai Nature Science Grant (Project Number is 11ZR1447200). We declare that we have no conflict of interest.		44	7	8	WILEY-BLACKWELL	HOBOKEN	111 RIVER ST, HOBOKEN 07030-5774, NJ USA	0020-8132	1466-7657		INT NURS REV	Int. Nurs. Rev.	SEP	2011	58	3					288
J	Hao, Y; Liu, H; Yue, S; Liu, X				Hao, Y.; Liu, H.; Yue, S.; Liu, X.			Introducing traditional Chinese nursing: a review of concepts, theories and practices	INTERNATIONAL NURSING REVIEW			English	Review						Holism; Prevention; Self-rehabilitation; Theory of Five Elements; Theory of Yin-Yang; Traditional Chinese Medicine; Traditional Chinese Nursing	EDUCATION; ACUPRESSURE	Aim: This paper discussed the basic concepts, theories and practices of traditional Chinese nursing (TCN) to enrich our understanding of relevant concepts and ways to contribute to human health. Background: Advantages of TCN include health education based on theories and techniques of traditional Chinese medicine. It focuses mainly on mobilizing humans' capacity for self-adjustment and self-rehab…	[Hao, Y.; Liu, X.] Second Mil Med Univ, Sch Nursing, Shanghai 200433, Peoples R China; [Hao, Y.; Liu, H.; Yue, S.] Beijing Univ Chinese Med, Sch Nursing, Beijing, Peoples R China; [Yue, S.] Sichuan Univ, Dept Nursing, W China Hosp, Chengdu 610064, Sichuan, Peoples R China	Liu, X (reprint author), Second Mil Med Univ, Sch Nursing, 800 Xiangyin Rd, Shanghai 200433, Peoples R China.	xhliu@smmu.edu.cn						40	3	3	WILEY-BLACKWELL	HOBOKEN	111 RIVER ST, HOBOKEN 07030-5774, NJ USA	0020-8132	1466-7657		INT NURS REV	Int. Nurs. Rev.	SEP	2011	58	3					319
J	Peng, J; Hui, ZY				Peng, J.; Hui, Z. -Y.			Nursing research in three regions in China: a bibliometric study	INTERNATIONAL NURSING REVIEW			English	Review						Hong Kong; Impact Factor; Mainland China; Nursing Research; PubMed; Science Citation Index Expanded; Taiwan		Objective: To analyse scientific papers published by Chinese authors in nursing journals included in the Science Citation Index Expanded and compare the published scientific papers from mainland China (ML), Taiwan (TW) and Hong Kong (HK). Methods: All articles published in 62 journals that were related to nursing originating from ML, TW and HK from 1999 to 2008 were retrieved from the PubMed and …	[Peng, J.; Hui, Z. -Y.] Lib Second Mil Med Univ, Shanghai 200433, Peoples R China	Peng, J (reprint author), Lib Second Mil Med Univ, 800 Xiangyin Rd, Shanghai 200433, Peoples R China.	pengjun@smmu.edu.cn	PENG, Jun/L-1780-2013	PENG, Jun/0000-0002-5935-7501				21	2	3	WILEY-BLACKWELL	MALDEN	COMMERCE PLACE, 350 MAIN ST, MALDEN 02148, MA USA	0020-8132			INT NURS REV	Int. Nurs. Rev.	MAR	2011	58	1					21
J	Meng, M; Zhang, XW; Jiang, AL				Meng Meng; Zhang Xiuwei; Jiang Anli			A theoretical framework of caring in the Chinese context: a grounded theory study	JOURNAL OF ADVANCED NURSING			English	Article						caring; grounded theory; human care; nursing; theoretical framework	EDUCATIONAL COMPETENCES; CANCER-PATIENTS; PERCEPTIONS; NURSES; PERSPECTIVE; BEHAVIORS; CARE	Aim. This paper is a report of a study describing the components of nurse caring in the Chinese cultural context. Background. The expressions, dimensions and patterns of caring vary in different cultures. Caring is deeply embedded in the Chinese culture and nurses are told to care for patients as if they were related by blood. However, to put caring in a professional and practical context, it mus…	[Meng Meng; Zhang Xiuwei; Jiang Anli] Second Mil Med Univ, Sch Nursing, Shanghai, Peoples R China; [Zhang Xiuwei] Huzhou Normal Univ, Sch Med, Dept Nursing, Huzhou, Zhejiang, Peoples R China	Jiang, AL (reprint author), Second Mil Med Univ, Sch Nursing, Shanghai, Peoples R China.	aljiang00@yahoo.cn			Second Military Medical University, China	The financial support of the research was provided by a fund for graduates' study of the Second Military Medical University, China.		28	6	8	WILEY-BLACKWELL	HOBOKEN	111 RIVER ST, HOBOKEN 07030-5774, NJ USA	0309-2402	1365-2648		J ADV NURS	J. Adv. Nurs.	JUL	2011	67	7					1523
J	Xie, ZY; Wang, AL; Chen, B				Xie, Zhenyu; Wang, Aolin; Chen, Bo			Nurse burnout and its association with occupational stress in a cross-sectional study in Shanghai	JOURNAL OF ADVANCED NURSING			English	Article						burnout; China; effort-reward imbalance; job content questionnaire; Maslach Burnout Inventory; nurses; stress	EFFORT-REWARD-IMBALANCE; JOB STRESS; MODELS; WORK; OUTCOMES; HEALTH; STRAIN	Aim. This paper is a report of a study investigating nurse burnout and its association with occupational stressors in Shanghai, China. Background. Burnout is described as feelings of emotional exhaustion, depersonalization and reduced personal accomplishment. Measuring burnout among nurses and its association with occupational stressors are important in providing appropriate intervention to reduc…	[Chen, Bo] Fudan Univ, Sch Publ Hlth, Shanghai 200433, Peoples R China; [Xie, Zhenyu] Pudong Ctr Dis Control & Prevent, Shanghai, Peoples R China; [Wang, Aolin] Fudan Uinvers, Sch Publ Hlth, Shanghai, Peoples R China	Chen, B (reprint author), Fudan Univ, Sch Publ Hlth, Shanghai 200433, Peoples R China.	chenb@fudan.edu.cn			Shanghai Municipal Health Bureau [08GWQ003]	This work was supported by a grant (08GWQ003) from Shanghai Municipal Health Bureau.		34	19	22	WILEY-BLACKWELL	MALDEN	COMMERCE PLACE, 350 MAIN ST, MALDEN 02148, MA USA	0309-2402			J ADV NURS	J. Adv. Nurs.	JUL	2011	67	7					1537
J	Hou, XJ; Zhu, D; Zheng, MH				Hou, XiaoJing; Zhu, Dan; Zheng, MinHua			Clinical Nursing Faculty Competence Inventory - development and psychometric testing	JOURNAL OF ADVANCED NURSING			English	Article						clinical faculty; clinical instructors; clinical teaching; core competence; instrument development; nurse education; nursing; nursing faculty	TEACHING EFFECTIVENESS; STUDENTS PERCEPTIONS; TEACHERS; MENTORS; SUPERVISION; EDUCATORS; OPINIONS	P>Aim. This paper is a report of the development and psychometric testing of the Clinical Nursing Faculty Competence Inventory. Background. Clinical faculty plays a vital role in nursing education. Highly competent clinical faculty is a prerequisite for graduating competent future nurses. Many studies have examined the effectiveness of clinical nursing teaching. Yet, translating this body of know…	[Hou, XiaoJing] Shanghai Jiao Tong Univ, Sch Nursing, Sch Med, Shanghai 200030, Peoples R China; [Zhu, Dan] Sichuan Univ, W China Hosp, Dept Nursing, W China Med Sch, Chengdu 610064, Peoples R China; [Zheng, MinHua] Fudan Univ, Huashan Hosp, Shanghai 200433, Peoples R China	Hou, XJ (reprint author), Shanghai Jiao Tong Univ, Sch Nursing, Sch Med, Shanghai 200030, Peoples R China.	hxj1166@163.com			Medical School of Shanghai Jiaotong University in China	This research was supported in part by the medical education development and research project at Medical School of Shanghai Jiaotong University in China.		29	2	2	WILEY-BLACKWELL	MALDEN	COMMERCE PLACE, 350 MAIN ST, MALDEN 02148, MA USA	0309-2402			J ADV NURS	J. Adv. Nurs.	MAY	2011	67	5					1109
J	Wu, PX; Guo, WY; Xia, HO; Lu, HJ; Xi, SX				Wu, Pei-Xia; Guo, Wen-Yi; Xia, Hai-Ou; Lu, Hui-Juan; Xi, Shu-Xin			Patients' experience of living with glaucoma: a phenomenological study	JOURNAL OF ADVANCED NURSING			English	Article						focus group; glaucoma; hermeneutic phenomenology; interviews; nursing; opthalmology; people's experiences	QUALITY-OF-LIFE; VISUAL-FIELD LOSS; SPIRITUALITY; MEDICINE; RELIGION; HEALTH; PERSPECTIVES; UNCERTAINTY; IMPAIRMENT; DIALYSIS	P>Aim. To explore the life experiences of those living with glaucoma and describe their strategies to deal with the consequences of this disorder. Background. Glaucoma, the second most common cause of worldwide blindness, often imposes limitations on the daily functions of its victims, thus resulting in a decline in their quality of life and high costs in healthcare. Methods. A hermeneutical phen…	[Xi, Shu-Xin] Fudan Univ, Dept Nursing, Eye & ENT Hosp, Shanghai 200433, Peoples R China; [Wu, Pei-Xia; Xia, Hai-Ou; Lu, Hui-Juan] Fudan Univ, Sch Nursing, Shanghai 200433, Peoples R China	Xi, SX (reprint author), Fudan Univ, Dept Nursing, Eye & ENT Hosp, Shanghai 200433, Peoples R China.	shuxinxi71@126.com			Shanghai Municipal Health Bureau and Fudan University [FDN200806]	This research received funding from Shanghai Municipal Health Bureau and Fudan University (Research fund number: FDN200806).		51	3	3	WILEY-BLACKWELL	MALDEN	COMMERCE PLACE, 350 MAIN ST, MALDEN 02148, MA USA	0309-2402			J ADV NURS	J. Adv. Nurs.	APR	2011	67	4					800
J	Jin, YY; Zhao, W; Cao, RM; Wang, X; Wu, SM; Chen, TX				Jin, Ying-Ying; Zhao, Wei; Cao, Rui-Ming; Wang, Xi; Wu, Sheng-Mei; Chen, Tong-Xin			Characterization of Immunocompetent Cells in Human Milk of Han Chinese	JOURNAL OF HUMAN LACTATION			English	Article						colostrum; mature milk; lymphocyte; flow cytometry; breast feeding	KILLER T-CELLS; BREAST-MILK; NONALLERGIC MOTHERS; ALLERGIC RESPONSES; LYMPHOCYTES; INFANT; EXPRESSION; DERMATITIS; CONTRIBUTE; LEUKOCYTES	Immunocompetent cells in colostrum and mature breast milk (42 days after delivery) of 64 Chinese females of Han ethnic background were characterized. The total cell numbers in colostrum and mature breast milk were 593 +/- 205 x 10(6)/L and 1.74 +/- 0.97 x 10(6)/L, respectively. NK cell is the predominant lymphocyte subtype (12.69%). T cells in colostrum express CD40L and CD25 without stimulation,…	[Cao, Rui-Ming; Wang, Xi; Chen, Tong-Xin] Shanghai Jiao Tong Univ, Sch Med, Shanghai Inst Pediat Res, Dept Immunol, Shanghai 200092, Peoples R China; [Jin, Ying-Ying] Shanghai Jiao Tong Univ, Dept Pediat, Xinhua Hosp, Sch Med, Shanghai 200030, Peoples R China; [Zhao, Wei] Virginia Commonwealth Univ, Dept Pediat, Div Allergy & Immunol, Richmond, VA USA	Chen, TX (reprint author), Shanghai Jiao Tong Univ, Sch Med, Shanghai Inst Pediat Res, Dept Immunol, 1665 Kongjiang Rd, Shanghai 200092, Peoples R China.	tongxinc@yahoo.com			Beingmate Group Co., Ltd	The study was funded by Beingmate Group Co., Ltd.		32	4	4	SAGE PUBLICATIONS INC	THOUSAND OAKS	2455 TELLER RD, THOUSAND OAKS, CA 91320 USA	0890-3344			J HUM LACT	J. Hum. Lact.	MAY	2011	27	2					155
J	Li, Y; Yuan, CR				Li, Yan; Yuan, Changrong			Levels of fatigue in Chinese women with breast cancer and its correlates: A cross-sectional questionnaire survey	JOURNAL OF THE AMERICAN ACADEMY OF NURSE PRACTITIONERS			English	Article						Cancer-related fatigue; Revised Piper Fatigue Scale; cross-sectional survey; psychological state; social support level	RECEIVING ADJUVANT CHEMOTHERAPY; QUALITY-OF-LIFE; SOCIAL SUPPORT; PREVALENCE; SURVIVORS; DISEASE; CARE; IMPACT; SCALE	Purpose: To identify the intensity of fatigue among Chinese women with breast cancer and to evaluate the relationships between fatigue, social support, anxiety, depression, clinical factors, and demographic data. Data sources: Two hundred fifty-two Chinese women with breast cancer were recruited by consecutive convenience sampling from four hospitals in Shanghai, China. Participants completed a d…	[Yuan, Changrong] Second Mil Med Univ, Coll Nursing, Shanghai 200433, Peoples R China; [Li, Yan] Shanghai Jiao Tong Univ, Sch Med, Ren Ji Hosp, Shanghai 200127, Peoples R China	Yuan, CR (reprint author), Second Mil Med Univ, Coll Nursing, 800 Xiangyin Rd, Shanghai 200433, Peoples R China.	yuancr510@yahoo.com.cn						36	5	5	WILEY-BLACKWELL	HOBOKEN	111 RIVER ST, HOBOKEN 07030-5774, NJ USA	1041-2972	1745-7599		J AM ACAD NURSE PRAC	J. Am. Acad. Nurse Pract.	MAR	2011	23	3					153
J	Gu, CY; Zhang, Z; Ding, Y				Gu, Chunyi; Zhang, Zheng; Ding, Yan			Chinese midwives' experience of providing continuity of care to labouring women	MIDWIFERY			English	Article						Midwives; One-to-one midwifery; Continuity of care; On-call system; Phenomenology	TO-ONE MIDWIFERY; JOB-SATISFACTION; TEAM MIDWIFERY; VIEWS; AUSTRALIA; HUSSERL; STRESS; TIMES	Objective: to explore and describe Chinese midwives' experience of providing one-to-one continuity of care to labouring women. Design: a qualitative study using a phenomenological approach. Data were collected using open-ended, tape-recorded interviews. The analysis of the transcribed texts included searching for themes sorted into clusters for a final expression of the essential structure of the…	[Gu, Chunyi; Zhang, Zheng] Fudan Univ, Obstet & Gynaecol Hosp, Labour Unit, Shanghai 200433, Peoples R China; [Ding, Yan] Fudan Univ, Obstet & Gynaecol Hosp, Dept Nursing, Shanghai 200433, Peoples R China	Gu, CY (reprint author), Fudan Univ, Obstet & Gynaecol Hosp, Labour Unit, Shanghai 200433, Peoples R China.	guchunyi@hotmail.com			Nursing School of Fudan University, Shanghai, China	This study was funded by grants from the Nursing School of Fudan University, Shanghai, China. Thanks to all those midwives who took part in the interviews. The authors would sincerely like to acknowledge the help of Professor Ingalill Rahm Hallberg, Director of the Swedish Institute for Health Care Sciences, and Ann M. Thomson, Professor of Midwifery, University of Manchester.		41	1	3	ELSEVIER SCI LTD	OXFORD	THE BOULEVARD, LANGFORD LANE, KIDLINGTON, OXFORD OX5 1GB, OXON, ENGLAND	0266-6138			MIDWIFERY	Midwifery	APR	2011	27	2					243
J	Cui, J; Shen, FP; Ma, XQ; Zhao, JJ				Cui, Jing; Shen, Fengping; Ma, Xiuqiang; Zhao, Jijun			What Do Nurses Want to Learn From Death Education? A Survey of Their Needs	ONCOLOGY NURSING FORUM			English	Article								Purpose/Objectives: To identify what nurses want to know most about death education and to obtain baseline data to improve nurses' training and education. Design: A cross-sectional survey. Setting: Seven hospitals in Shanghai, China. Sample: 617 RNs. Methods: A cross-sectional survey using a self-report questionnaire was administered to a purposive sample of RNs. The data were analyzed with SAS (…	[Cui, Jing; Shen, Fengping; Zhao, Jijun] Second Mil Med Univ, Changhai Hosp, Shanghai, Peoples R China; [Cui, Jing; Zhao, Jijun] Second Mil Med Univ, Dept Nursing, Shanghai, Peoples R China; [Shen, Fengping] Second Mil Med Univ, Dept Oncol, Shanghai, Peoples R China; [Ma, Xiuqiang] Second Mil Med Univ, Dept Hlth Stat, Shanghai, Peoples R China	Cui, J (reprint author), Second Mil Med Univ, Changhai Hosp, Shanghai, Peoples R China.	jcui83@yahoo.com.cn						41	2	4	ONCOLOGY NURSING SOC	PITTSBURGH	125 ENTERPRISE DR, PITTSBURGH, PA 15275 USA	0190-535X	1538-0688		ONCOL NURS FORUM	Oncol. Nurs. Forum	NOV	2011	38	6					E402
J	Qian, HJ; Yuan, CR				Qian, Huijuan; Yuan, Changrong			Factors Associated With Self-care Self-efficacy Among Gastric and Colorectal Cancer Patients	CANCER NURSING			English	Article						Chinese patient; Colorectal cancer; Gastric cancer; Self-care; Self-efficacy	QUALITY-OF-LIFE; HEALTH SURVEY SF-36; BREAST-CANCER; PHYSICAL-ACTIVITY; ADJUSTMENT; PAIN; INFORMATION; DEPRESSION; MANAGEMENT; SURVIVORS	Background: Many studies have demonstrated that self-efficacy plays a crucial role in self-care. However, findings from previous studies indicate that the relationships between self-efficacy and several variables are inconsistent. Objective: The purpose of this study was to assess the level of self-care self-efficacy among Chinese gastric and colorectal cancer patients and to identify the demogra…	[Qian, Huijuan; Yuan, Changrong] Second Mil Med Univ, Coll Nursing, Shanghai, Peoples R China	Yuan, CR (reprint author), Shanghai Second Mil Med Univ, Xiangyin Rd 800, Shanghai 200433, Peoples R China.	yuancr510@yahoocom.cn						51	6	7	LIPPINCOTT WILLIAMS & WILKINS	PHILADELPHIA	530 WALNUT ST, PHILADELPHIA, PA 19106-3621 USA	0162-220X	1538-9804		CANCER NURS	Cancer Nurs.	MAY-JUN	2012	35	3					E22
J	Chu, HQ; Liu, JM; Gui, T; Zhao, L; Sun, DY; Zhang, JB; Yi, XH				Chu, Hai-Qing; Liu, Jin-Ming; Gui, Tao; Zhao, Lan; Sun, Dao-Yuan; Zhang, Jing-Bo; Yi, Xiang-Hua			Case of interstitial lung disease possibly induced by exposure to iron dust	HEART & LUNG			English	Article							PATIENT	Interstitial lung diseases are primarily attributable to occupational or environmental exposures to dusts and irritants. We report on a case of interstitial lung disease, possibly secondary to iron exposure. Our male patient presented with cough and shortness of breath of more than 20 years' duration after his occupational exposure had ended. A chest radiograph showed patchy shadows throughout bo…	[Chu, Hai-Qing; Liu, Jin-Ming; Gui, Tao; Zhao, Lan] Tongji Univ, Sch Med, Shanghai Pulm Hosp, Dept Resp Dis, Shanghai 200433, Peoples R China; [Sun, Dao-Yuan; Zhang, Jing-Bo] Tongji Univ, Sch Med, Shanghai Pulm Hosp, Dept Occupat Dis, Shanghai 200433, Peoples R China; [Yi, Xiang-Hua] Tongji Univ, Tongji Hosp, Dept Pathol, Shanghai 200433, Peoples R China	Chu, HQ (reprint author), Tongji Univ, Sch Med, Shanghai Pulm Hosp, Dept Resp Dis, 507 Zheng Min Rd, Shanghai 200433, Peoples R China.	chu_haiqing@126.com						10	0	0	MOSBY-ELSEVIER	NEW YORK	360 PARK AVENUE SOUTH, NEW YORK, NY 10010-1710 USA	0147-9563			HEART LUNG	Heart Lung	MAR-APR	2012	41	2					196
J	Wang, HX; Yue, J; Yang, JH; Gao, RL; Liu, JM				Wang, Hongxiu; Yue, Jun; Yang, Jinghui; Gao, Rongliang; Liu, Jinming			Clinical diagnostic utility of adenosine deaminase, interferon-gamma, interferon-gamma-induced protein of 10 kDa, and dipeptidyl peptidase 4 levels in tuberculous pleural effusions	HEART & LUNG			English	Article						Adenosine deaminase; Dipeptidyl peptidase 4; Interferon-gamma; Interferon-gamma-induced protein of 10 kDa; Tuberculous pleural effusion	DIFFERENTIAL-DIAGNOSIS; FLUID; IV; EXPRESSION; PLEURITIS; LEUKEMIA; TOOLS; SERUM	OBJECTIVE: Current tools for the diagnosis of tuberculous pleural effusions are suboptimal. The study was undertaken to evaluate the accuracy of pleural fluid adenosine deaminase (ADA), interferon (IFN)-gamma, interferon-gamma-induced protein of 10 kDa (IP-10), and dipeptidyl peptidase (DPP) 4 levels in differentiating tuberculous pleural effusion (TPE) and non-TPE. METHODS: A total of 122 sample…	[Liu, Jinming] Tongji Univ, Dept Pneumol, Shanghai Pulm Hosp, Sch Med, Shanghai 200433, Peoples R China; [Wang, Hongxiu; Yue, Jun; Yang, Jinghui; Gao, Rongliang] Tongji Univ, Key Lab Mycobacteria TB, Shanghai Pulm Hosp, Sch Med, Shanghai 200433, Peoples R China	Liu, JM (reprint author), Tongji Univ, Dept Pneumol, Shanghai Pulm Hosp, Sch Med, 507 Zhengmin Rd, Shanghai 200433, Peoples R China.	liujinmingwl@sohu.com						26	7	9	MOSBY-ELSEVIER	NEW YORK	360 PARK AVENUE SOUTH, NEW YORK, NY 10010-1710 USA	0147-9563			HEART LUNG	Heart Lung	JAN-FEB	2012	41	1					70
J	Zhang, SY; Edwards, H; Yates, P; Ruth, E; Guo, QH				Zhang, Shu-Ying; Edwards, Helen; Yates, Patsy; Ruth, Elder; Guo, Qi Hao			Development of Self-Efficacy Questionnaire for Chinese Family Caregivers	INTERNATIONAL JOURNAL OF MENTAL HEALTH NURSING			English	Article						dementia; family caregiver; instrument development; Self-Efficacy Questionnaire for Chinese Family Caregivers	DEMENTIA; MAINTENANCE; HEALTH	The purpose of this study was to develop a Self-Efficacy Questionnaire for Chinese Family Caregivers. Semi-structured interviews with 10 family caregivers of people with dementia were conducted to explore how Chinese caregivers manage caregiving and what difficulties they face. The findings of the study assisted in the development of the instrument. Five categories of caregiver behaviours were id…	[Zhang, Shu-Ying] Tongji Univ, Sch Med, Shanghai 200092, Peoples R China; [Guo, Qi Hao] Fudan Univ, Huashan Hosp, State Key Lab Med Neurobiol, Dept Neurol,Shanghai Med Coll, Shanghai 200433, Peoples R China; [Guo, Qi Hao] Fudan Univ, Huashan Hosp, State Key Lab Med Neurobiol, Inst Neurol,Shanghai Med Coll, Shanghai 200433, Peoples R China; [Edwards, Helen; Yates, Patsy] Queensland Univ Technol, I…	Zhang, SY (reprint author), Tongji Univ, Sch Med, 1239 Si Ping Rd, Shanghai 200092, Peoples R China.	zhangsy@tongji.edu.cn	Edwards, Helen/I-9554-2012; Yates, Patsy/I-9599-2012					15	4	5	WILEY-BLACKWELL	HOBOKEN	111 RIVER ST, HOBOKEN 07030-5774, NJ USA	1445-8330			INT J MENT HEALTH NU	Int. J. Ment. Health Nurs.	AUG	2012	21	4					358
J	He, MX; Hu, Y				He, Mengxue; Hu, Yan			Integrating the online nursing evidence-based information resources for evidence-based nursing study in China	INTERNATIONAL JOURNAL OF NURSING PRACTICE			English	Article						evidence-based nursing; evidence-based nursing practice; evidence transmission; nursing informatics	SYSTEMATIC REVIEWS; HEALTH; TECHNOLOGIES; KNOWLEDGE; COUNTRIES; ATTITUDES; RELEVANT; SUPPORT; NURSES; FORUM	At present Chinese nurses could not get the up-to-date and high-quality evidences efficiently and conveniently due to language barrier and other practical difficulties. This program built a Chinese website of integrated evidence-based network information resources for EBN studies. Researchers hope to provide practical guidance and advice for nurses in non-English-speaking countries..	[He, Mengxue; Hu, Yan] Fudan Univ, Sch Nursing, Shanghai 200032, Peoples R China	Hu, Y (reprint author), Fudan Univ, Sch Nursing, 305 Fenglin Rd, Shanghai 200032, Peoples R China.	huyan@fudan.edu.cn			Science and Research Grant of School of Nursing, Fudan University; NIH, Fogarty International Center [R25TW008118]; Fogarty International Center [R25TW008118]	1. Science and Research Grant of School of Nursing, Fudan University2. NIH, Fogarty International Center Grant R25TW008118This website could not have been constructed without the contribution of JBI, the cooperation and endeavour of staff and students in Fudan University School of Nursing who dedicated to translation of evidence and brought such wide experiences and suggestions to refine this web…		34	0	0	WILEY-BLACKWELL	HOBOKEN	111 RIVER ST, HOBOKEN 07030-5774, NJ USA	1322-7114			INT J NURS PRACT	Int. J. Nurs. Pract.	OCT	2012	18	5					429
J	Wang, L; Tao, H; Ellenbecker, CH; Liu, XH				Wang, L.; Tao, H.; Ellenbecker, C. H.; Liu, X. H.			Predictors of hospital nurses' intent to stay: a cross-sectional questionnaire survey in Shanghai, China	INTERNATIONAL NURSING REVIEW			English	Article						Intent to Stay; Job Satisfaction; Mainland China; Nursing Shortage; Occupational Commitment	JOB-SATISFACTION; OCCUPATIONAL COMMITMENT; REGISTERED NURSES; HEALTH-CARE; TURNOVER; MODEL; RETENTION; LEAVE; WORK	Wang L., Tao H., Ellenbecker C.H. & Liu X.H. (2012) Predictors of hospital nurses' intent to stay: a cross-sectional questionnaire survey in Shanghai, China. International Nursing Revie Aim: To investigate predictors of hospital nurses' intent to stay in the nursing profession. Methods: A cross-sectional survey design was adopted. Over 1000 nurses working in hospitals in Shanghai, China, were inv…	[Liu, X. H.] Second Mil Med Univ, Sch Nursing, Shanghai 200433, Peoples R China; [Wang, L.] Shanghai Jiao Tong Univ, Shanghai 200030, Peoples R China; [Tao, H.] Univ Wisconsin, Coll Nursing, Milwaukee, WI 53201 USA; [Ellenbecker, C. H.] Univ Massachusetts, Coll Nursing & Hlth Sci, Boston, MA 02125 USA	Liu, XH (reprint author), Second Mil Med Univ, Sch Nursing, 800 Xiangyin Rd, Shanghai 200433, Peoples R China.	taoh@uwm.edu; xhliu@smmu.edu.cn			Shanghai Pujiang Program, Shanghai Government, China [2005105]	The research was funded by Shanghai Pujiang Program, Shanghai Government, China, No. 2005105.		49	3	3	WILEY-BLACKWELL	HOBOKEN	111 RIVER ST, HOBOKEN 07030-5774, NJ USA	0020-8132	1466-7657		INT NURS REV	Int. Nurs. Rev.	DEC	2012	59	4					547
J	Shen, HX; Edwards, H; Courtney, M; McDowell, J; Wu, M				Shen, Huixia; Edwards, Helen; Courtney, Mary; McDowell, Jan; Wu, Ming			Peer-led diabetes self-management programme for community-dwelling older people in China: study protocol for a quasi-experimental design	JOURNAL OF ADVANCED NURSING			English	Article						diabetes; nursing; peer; research protocol; self-efficacy; self-management; social support	RANDOMIZED CONTROLLED-TRIAL; IMPROVING GLYCEMIC CONTROL; SOCIAL COGNITIVE THEORY; QUALITY-OF-LIFE; CHRONIC DISEASE; PHYSICAL-ACTIVITY; SUPPORT SURVEY; HEALTH SURVEY; INTERVENTION; EDUCATION	Aim. A protocol for a new peer-led self-management programme for community-dwelling older people with diabetes in Shanghai, China. Background. The increasing prevalence of type 2 diabetes poses major public health challenges. Appropriate education programmes could help people with diabetes to achieve self-management and better health outcomes. Providing education programmes to the fast growing nu…	[Shen, Huixia; Wu, Ming] Tongji Univ, Sch Med, Dept Nursing, Shanghai 200092, Peoples R China; [Edwards, Helen; Courtney, Mary; McDowell, Jan] Queensland Univ Technol, Sch Nursing & Midwifery, Inst Hlth & Biomed Innovat, Brisbane, Qld 4001, Australia	Shen, HX (reprint author), Tongji Univ, Sch Med, Dept Nursing, Shanghai 200092, Peoples R China.	shhx@tongji.edu.cn	Edwards, Helen/I-9554-2012		Queensland University of Technology; Tongji University	This article forms part of the project entitled 'Effectiveness of a peer-led self-management programme for older people with type 2 diabetes in China' financed by Queensland University of Technology International Doctoral Scholarships. In addition, the study has been supported by Tongji University and community partners in China.		55	4	6	WILEY-BLACKWELL	HOBOKEN	111 RIVER ST, HOBOKEN 07030-5774, NJ USA	0309-2402			J ADV NURS	J. Adv. Nurs.	DEC	2012	68	12					2766
J	Liu, C; Zhang, LJ; Ye, WQ; Zhu, JY; Cao, J; Lu, XY; Li, FP				Liu, Cui; Zhang, Lingjuan; Ye, Wenqin; Zhu, Jianying; Cao, Jie; Lu, Xiaoying; Li, Fengping			Job satisfaction and intention to leave: a questionnaire survey of hospital nurses in Shanghai of China	JOURNAL OF CLINICAL NURSING			English	Article						China; intention to leave; job satisfaction; nurses; nursing; Shanghai; workforce	NURSING STAFF; TURNOVER; WORKPLACE; RETENTION; WORKING; SYSTEM; IMPACT	Aim. To explore nurses views and experiences regarding job satisfaction and their intention to leave in Shanghai. Background. The widespread nursing shortage and nurses' high turnover rate has become a global issue. Job satisfaction is the most consistent predictor of nurses' intention to leave and has been reported as explaining most of the variance on their intention to leave. Design. A cross-s…	[Liu, Cui; Zhang, Lingjuan; Ye, Wenqin; Zhu, Jianying; Cao, Jie; Lu, Xiaoying; Li, Fengping] SMMU, Changhai Hosp, Dept Nursing, Shanghai 200433, Peoples R China	Ye, WQ (reprint author), SMMU, Changhai Hosp, Dept Nursing, 168 Changhai Rd, Shanghai 200433, Peoples R China.	wq1718@163.com			Shanghai Leading Academic Discipline Project [B903]; Second Military Medical University	The authors would like to thank all of the participants in this study, Pro. Ma Xiuqiang from health statistics department of SMMU for his precious advice, Shanghai Leading Academic Discipline Project (Project Number: B903) and Second Military Medical University for funding the research. Also, the authors would like to thank Shanghai Municipal Health Bureau and Nursing Association for their help i…		53	6	7	WILEY-BLACKWELL	HOBOKEN	111 RIVER ST, HOBOKEN 07030-5774, NJ USA	0962-1067			J CLIN NURS	J. Clin. Nurs.	JAN	2012	21	42006					255
J	Tao, H; Zhang, AH; Hu, JC; Zhang, YQ				Tao, Hong; Zhang, Aihua; Hu, Jingchao; Zhang, Yaqing			Regional differences in job satisfaction for mainland Chinese nurses	NURSING OUTLOOK			English	Article						Job satisfaction; Regional differences; Nursing; Nurse; Mainland China	ORGANIZATIONAL COMMITMENT; NURSING TURNOVER; HOSPITAL NURSES; HEALTH-CARE; INTENT; EMPOWERMENT; RETENTION; MODEL	Background: Although there is an abundance of research on nurses' job satisfaction, there is a paucity of publications on the regional differences that impact on nurses' job satisfaction. Purpose: To compare the differences between northern and southern hospitals in Mainland China with respect to nurses' job satisfaction. Methods: A cross-sectional survey design was selected. Data were analyzed u…	[Tao, Hong] Univ Wisconsin, Coll Nursing, Milwaukee, WI 53201 USA; [Zhang, Aihua] Tai Shan Med Coll, Sch Nursing, Tai An, Shandong, Peoples R China; [Hu, Jingchao] Harbin Med Univ, Dept Nursing, Harbin, Peoples R China; [Zhang, Yaqing] Shanghai Jiao Tong Univ, Sch Nursing, Shanghai 200030, Peoples R China	Zhang, YQ (reprint author), 227 S Chongqing Rd, Shanghai 200025, Peoples R China.	zhangyqf@yahoo.com.cn			Shanghai Pujiang Program, Shanghai Government, China [2005105]	This study was sponsored by Shanghai Pujiang Program, Shanghai Government, China. No. 2005105.		46	4	4	ELSEVIER SCIENCE INC	NEW YORK	360 PARK AVE SOUTH, NEW YORK, NY 10010-1710 USA	0029-6554			NURS OUTLOOK	Nurs. Outlook	JUL-AUG	2012	60	4					213
J	Bai, JB; Hsu, LL; Tang, Y; van Dijk, M				Bai, Jinbing; Hsu, Lily; Tang, Yan; van Dijk, Monique			Validation of the COMFORT Behavior Scale and the FLACC Scale for Pain Assessment in Chinese Children after Cardiac Surgery	PAIN MANAGEMENT NURSING			English	Article							PEDIATRIC INTENSIVE-CARE; VISUAL ANALOG; INFANTS; TOOL; RELIABILITY; ADOLESCENTS; SEDATION; BLOCKADE; VALIDITY	Appropriate pain assessment plays a key role in understanding the pain status of critically ill children. However, the utility of the face, legs, activity, cry, consolability (FLACC) scale and the COMFORT Behavior (COMFORT-B) scale have not been extensively explored for children after cardiac surgery in China. A repeated-observation study was conducted to evaluate the concurrent validity and the …	[Hsu, Lily] Shanghai Jiao Tong Univ, Sch Nursing, Shanghai 200025, Peoples R China; [Bai, Jinbing] Tianjin Med Univ, Sch Nursing, Tianjin, Peoples R China; [Tang, Yan] Shanghai Childrens Med Ctr, Dept Cardiovasc Surg, Shanghai, Peoples R China; [van Dijk, Monique] Erasmus Med Ctr Sophia, Dept Pediat Surg, Rotterdam, Netherlands	Hsu, LL (reprint author), Shanghai Jiao Tong Univ, Sch Nursing, 227 Chong Qing Nan Rd, Shanghai 200025, Peoples R China.	lilyhsu@projecthope.org.cn	van Dijk, Monique/B-6327-2009		Shanghai Children's Medical Center	The authors thank Sandra Merkel for generously sharing the scale and the doctor, and nurses of Shanghai Children's Medical Center for their support in performing this study Special thanks are extended to the children and their parents for participation. The authors also thank Ko Hagoort for editing the manuscript.		38	6	10	ELSEVIER SCIENCE INC	NEW YORK	360 PARK AVE SOUTH, NEW YORK, NY 10010-1710 USA	1524-9042			PAIN MANAG NURS	Pain Manag. Nurs.	MAR	2012	13	1					18
J	Liu, YZ; Liu, M; Zhang, YM; Kang, L; Chen, PZ; Wang, ZF; Feng, Y; Zheng, JH				Liu, Yong-zhen; Liu, Min; Zhang, Yi-ming; Kang, Li; Chen, Ping-zhi; Wang, Ze-feng; Feng, Yuan; Zheng, Jun-hua			Protective Effects of Rosuvastatin in Experimental Renal Failure Rats via Improved Endothelial Function	BIOLOGICAL RESEARCH FOR NURSING			English	Article						rosuvastatin; endothelial dysfunction; chronic kidney disease; 5; 6 nephrectomy	CHRONIC KIDNEY-DISEASE; SPONTANEOUSLY HYPERTENSIVE-RATS; OBESE ZUCKER RATS; URINARY ALBUMIN; DYSFUNCTION; EXPRESSION; ATORVASTATIN; PROGRESSION; INJURY; DIET	Rosuvastatin is a statin (3-hydroxy-3-methylglutaryl coenzyme-A [HMG-CoA] reductase inhibitor) that also serves as an endothelial dysfunction salvager in many disease models. Endothelial dysfunction is assumed to play a pivotal role in the process of chronic renal failure. The authors tested rosuvastatin on a rat model of renal failure with hypertension. Renal failure was induced by 5/6 nephrecto…	[Liu, Yong-zhen] Tongji Univ, Inst Med Sci, Dept Nursing, Shanghai 200072, Peoples R China; [Liu, Min] Tongji Univ, Shanghai Peoples Hosp 10, Dept Surg, Shanghai 200072, Peoples R China; [Liu, Min; Zhang, Yi-ming; Kang, Li; Wang, Ze-feng; Zheng, Jun-hua] Tongji Univ, Shanghai Peoples Hosp 10, Dept Urol, Shanghai 200072, Peoples R China; [Chen, Ping-zhi] Shanghai Nursing Assoc, Shanghai, Peoples R…	Zheng, JH (reprint author), Tongji Univ, Shanghai Peoples Hosp 10, Dept Urol, 301 Midyanchang Rd, Shanghai 200072, Peoples R China.	lucky_lm@263.net			National Natural Science Foundation of China [81000311]	The author(s) disclosed receipt of the following financial support for the research, authorship, and/or publication of this article: This work was supported in part by a research grant from the National Natural Science Foundation of China (No. 81000311).		24	2	3	SAGE PUBLICATIONS INC	THOUSAND OAKS	2455 TELLER RD, THOUSAND OAKS, CA 91320 USA	1099-8004			BIOL RES NURS	Biol. Res. Nurs.	JUL	2013	15	3					356
J	Liu, YY; Hinds, PS; Wang, JC; Correia, H; Du, SZ; Ding, J; Gao, WJ; Yuan, CR				Liu, Yanyan; Hinds, Pamela S.; Wang, Jichuan; Correia, Helena; Du, Shizheng; Ding, Jian; Gao, Wen Jun; Yuan, Changrong			Translation and Linguistic Validation of the Pediatric Patient-Reported Outcomes Measurement Information System Measures Into Simplified Chinese Using Cognitive Interviewing Methodology	CANCER NURSING			English	Article						Cognitive interviewing; Cross-cultural translation; Pediatric; PROMIS; Short forms	QUALITY-OF-LIFE; RESPONSE THEORY ANALYSIS; ITEM BANK; CULTURAL-ADAPTATION; PROMIS; CHILDREN; SCALE; CANCER; HEALTH; SYMPTOMS	Background: The Pediatric Patient-Reported Outcomes Measurement Information System (PROMIS) measures were developed using modern measurement theory and tested in a variety of settings to assess the quality of life, function, and symptoms of children and adolescents experiencing a chronic illness and its treatment. Developed in English, this set of measures had not been translated into Chinese. Ob…	[Liu, Yanyan; Gao, Wen Jun; Yuan, Changrong] Second Mil Med Univ, Sch Nursing, Shanghai 200433, Peoples R China; [Hinds, Pamela S.; Wang, Jichuan] George Washington Univ, Sch Med, Dept Nursing Res & Qual Outcomes, Washington, DC USA; [Hinds, Pamela S.; Wang, Jichuan] George Washington Univ, Childrens Natl Med Ctr, Sch Med, Ctr Translat Sci, Washington, DC USA; [Correia, Helena] Northwestern Univ,…	Yuan, CR (reprint author), Second Mil Med Univ, Sch Nursing, 800 Xiang Yin Rd, Shanghai 200433, Peoples R China.	yuancr510@yahoo.com.cn			Science and Technology Commission of Shanghai Municipality, China [12410707900]; Oncology Nursing Society Foundation	This research was supported by the Science and Technology Commission of Shanghai Municipality, China (project no. 12410707900) and Oncology Nursing Society Foundation.		41	1	1	LIPPINCOTT WILLIAMS & WILKINS	PHILADELPHIA	530 WALNUT ST, PHILADELPHIA, PA 19106-3621 USA	0162-220X			CANCER NURS	Cancer Nurs.	SEP-OCT	2013	36	5					368
J	Li, YX; Yu, JQ; Tang, L; Xu, B; Fang, F; Nie, HX; Dai, XY; Zhang, Y; Li, L; Zhou, LJ; Han, WJ; Liu, MJ; Cui, J; Meng, XL; Zhao, JJ				Li, Yu-Xiang; Yu, Jian-Qiang; Tang, Lu; Xu, Bo; Fang, Fang; Nie, Hong-Xia; Dai, Xiu-Ying; Zhang, Yue; Li, Li; Zhou, Ling-Jun; Han, Wen-Jun; Liu, Meng-Jie; Cui, Jing; Meng, Xian-Li; Zhao, Ji-Jun			Cancer Pain Management at Home Voice From an Underdeveloped Region of China	CANCER NURSING			English	Article						Advanced cancer; Pain management; Underdeveloped area	ATTITUDES; ANALGESICS; BARRIERS; PATIENT; STAFF	Background: Pain is a major problem for patients with advanced cancer and one of the most frequent and disturbing of all cancer-related symptoms. Researchers continue to report that cancer pain remains undertreated. Inadequate pain control can significantly affect the patient's quality of life and may in turn affect the patient's will to live or comply with treatment recommendations. A better und…	[Tang, Lu; Fang, Fang; Han, Wen-Jun; Meng, Xian-Li; Zhao, Ji-Jun] Second Mil Med Univ, Changhai Hosp, Dept Nursing, Shanghai 200433, Peoples R China; [Fang, Fang] Second Mil Med Univ, Changhai Hosp, Dept Obstet, Shanghai 200433, Peoples R China; Second Mil Med Univ, East Hepatol & Bile Hosp, Intens Care Unit, Shanghai 200433, Peoples R China; [Zhou, Ling-Jun; Cui, Jing] Second Mil Med Univ, Dept …	Zhao, JJ (reprint author), Second Mil Med Univ, Changhai Hosp, Dept Nursing, 168 Changhai Rd, Shanghai 200433, Peoples R China.	zhaojijun2000@yahoo.com			National Natural Science Foundation of China [70973136]	The study was supported by the National Natural Science Foundation of China (grant no. 70973136).		31	1	1	LIPPINCOTT WILLIAMS & WILKINS	PHILADELPHIA	530 WALNUT ST, PHILADELPHIA, PA 19106-3621 USA	0162-220X	1538-9804		CANCER NURS	Cancer Nurs.	JUL-AUG	2013	36	4					326
J	Ding, Y; Hu, Y; Hallberg, IR				Ding, Yan; Hu, Yan; Hallberg, Ingalill Rahm			Health-Related Quality of Life and Associated Factors in Chinese Women With Cervical Cancer A 9-Month Follow-up	CANCER NURSING			English	Article						Cervical cancer; Chinese; FACT-Cx; Health-related quality of life; Sense of coherence; Social support	FUNCTIONAL-ASSESSMENT; COHERENCE SCALE; OVARIAN MALIGNANCIES; ANTONOVSKYS SENSE; VALIDATION; SURVIVORS; QUESTIONNAIRE; CHEMOTHERAPY; DISTRESS; OUTCOMES	Background: There is a lack of health-related quality of life (HRQOL) studies in Chinese women with cervical cancer. Objective: The objectives of this study were to investigate the HRQOL trajectory in women with cervical cancer in Mainland China in the 9 months following diagnosis and to identify factors that influence HRQOL. Methods: Initially, 187 patients with cervical cancer were included in …	[Ding, Yan; Hallberg, Ingalill Rahm] Lund Univ, Dept Hlth Sci, Fac Med, S-22100 Lund, Sweden; [Ding, Yan] Fudan Univ, Obstet & Gynecol Hosp, Shanghai 200433, Peoples R China; [Hu, Yan] Fudan Univ, Sch Nursing, Shanghai 200433, Peoples R China	Ding, Y (reprint author), 419 Fang Xie Rd, Shanghai 200011, Peoples R China.	jonish@vip.sina.com			Shanghai Public Health Bureau; Fudan University, China	This study was supported by grants from Shanghai Public Health Bureau and Fudan University, China.		46	1	1	LIPPINCOTT WILLIAMS & WILKINS	PHILADELPHIA	530 WALNUT ST, PHILADELPHIA, PA 19106-3621 USA	0162-220X	1538-9804		CANCER NURS	Cancer Nurs.	JUL-AUG	2013	36	4					E18
J	Wang, R; Liu, J; Chen, PJ; Yu, DH				Wang, Ru; Liu, Jing; Chen, Peijie; Yu, Dinghai			Regular Tai Chi Exercise Decreases the Percentage of Type 2 Cytokine Producing Cells in Postsurgical Non-Small Cell Lung Cancer Survivors	CANCER NURSING			English	Article						Aerobic exercise; Cortisol; IL-4; Neoplasm	HELPER T-LYMPHOCYTES; BETA-ENDORPHIN; OLDER-ADULTS; IMMUNE-RESPONSE; FLOW-CYTOMETRY; BREAST-CANCER; NKT CELLS; STRESS; CHUAN; DISEASE	Background: Tai Chi combines aspects of meditation and aerobic exercise. Its effect on the balance between cellular and humoral immunity, which potentiates human immunity against tumors, remains to be determined. Objective: The objective was to investigate the effect of a 16-week Tai Chi exercise intervention on the recovery of postsurgical non-small cell lung cancer survivors. Interventions/Meth…	[Wang, Ru; Liu, Jing; Chen, Peijie; Yu, Dinghai] Shanghai Univ Sport, Sch Kinesiol, Shanghai 200438, Peoples R China	Yu, DH (reprint author), Shanghai Univ Sport, Sch Wushu, Shanghai 200438, Peoples R China.	yudinghai0730@yahoo.com.cn			National Science Foundation of China [30840046]; Shanghai Key Lab of Human Performance [11DZ2261100]	This work was supported by grants from the National Science Foundation of China (no. 30840046) and the Shanghai Key Lab of Human Performance (no. 11DZ2261100).		50	7	7	LIPPINCOTT WILLIAMS & WILKINS	PHILADELPHIA	530 WALNUT ST, PHILADELPHIA, PA 19106-3621 USA	0162-220X	1538-9804		CANCER NURS	Cancer Nurs.	JUL-AUG	2013	36	4					E27
J	Hou, LL; Yao, LW; Niu, QM; Xu, L; Yu, QH; Sun, WQ; Yin, PH; Li, Q				Hou, Li L.; Yao, Li W.; Niu, Qian M.; Xu, L.; Yu, Qiu H.; Sun, Wen Q.; Yin, Pei-Hao; Li, Qi			Preventive Effect of Electrical Acupoint Stimulation on Lower-Limb Thrombosis A Prospective Study of Elderly Patients After Malignant Gastrointestinal Tumor Surgery	CANCER NURSING			English	Article						Elderly patients; Electrical acupoint stimulation; Hemorheology; Lower-limb thrombosis		Background: Lower deep venous thrombosis (DVT) is one of the major complications of patients with tumors or patients undergoing major surgery. Electrical acupoint stimulation, an established technique of traditional Chinese medicine (TCM), can be well combined with Western medicine to reduce the incidence of postoperative DVT, especially in elderly patients. Objective: The objectives of this stud…	[Hou, Li L.; Yao, Li W.; Niu, Qian M.; Xu, L.; Yu, Qiu H.; Sun, Wen Q.] Shanghai Univ Tradit Chinese Med, Putuo Hosp, Dept Nursing, Shanghai 200062, Peoples R China; [Yin, Pei-Hao] Shanghai Univ Tradit Chinese Med, Putuo Hosp, Dept Gen Surg, Shanghai 200062, Peoples R China; [Li, Qi] Shanghai Univ Tradit Chinese Med, Putuo Hosp, Dept Oncol, Shanghai 200062, Peoples R China	Yin, PH (reprint author), Shanghai Univ Tradit Chinese Med, Putuo Hosp, 164 Lanxi Rd, Shanghai 200062, Peoples R China.	yinpeihao1975@hotmail.com; lzwf@hotmail.com			Science and Technology Development Fund of Shanghai Municipal Public Health Bureau [2008Y127]	This study was supported by the Science and Technology Development Fund of Shanghai Municipal Public Health Bureau (no. 2008Y127).		22	2	2	LIPPINCOTT WILLIAMS & WILKINS	PHILADELPHIA	530 WALNUT ST, PHILADELPHIA, PA 19106-3621 USA	0162-220X			CANCER NURS	Cancer Nurs.	MAR-APR	2013	36	2					139
J	Gao, WJ; Yuan, CR; Wang, JC; Du, JR; Wu, HQ; Qian, XJ; Hinds, PS				Gao, Wenjun; Yuan, Changrong; Wang, Jichuan; Du, Jiarui; Wu, Huiqiao; Qian, Xiaojie; Hinds, Pamela S.			A Chinese Version of the City of Hope Quality of Life-Ostomy Questionnaire	CANCER NURSING			English	Article						C-COH; Chinese ostomy patients; Measurement; Quality of life; Reliability; Validity	OF-LIFE; SURGERY; ADJUSTMENT; VETERANS; OUTCOMES; CANCER	Background: The City of Hope Quality of Life-Ostomy Questionnaire is a widely accepted scale to assess quality of life in ostomy patients. However, the validity and reliability of the Chinese version (C-COH) have not been studied. Objective: The objective of the study was to assess the validity and reliability of the C-COH among ostomy patients sampled from Shanghai from August 2010 to June 2011.…	[Gao, Wenjun; Yuan, Changrong] Second Mil Med Univ, Coll Nursing, Shanghai 200433, Peoples R China; [Wang, Jichuan] George Washington Univ, Sch Med, Childrens Res Inst, Childrens Natl Med Ctr, Washington, DC USA; [Du, Jiarui] Fudan Univ, Dept Neurosurg, Jinshan Hosp, Shanghai 200433, Peoples R China; [Wu, Huiqiao] Second Mil Med Univ, Coll Med, Shanghai 200433, Peoples R China; [Qian, Xiaojie] Ch…	Yuan, CR (reprint author), Second Mil Med Univ, Coll Nursing, 800 Xiangying Rd, Shanghai 200433, Peoples R China.	yuancr510@yahoo.com.cn			Natural Science Grant of Shanghai, China [11ZR1447200]	This research was supported by the Natural Science Grant of Shanghai, China (project number 11ZR1447200).		31	0	0	LIPPINCOTT WILLIAMS & WILKINS	PHILADELPHIA	530 WALNUT ST, PHILADELPHIA, PA 19106-3621 USA	0162-220X	1538-9804		CANCER NURS	Cancer Nurs.	JAN-FEB	2013	36	1					41
J	Lin, QH; Fu, FM; Shen, LH; Zhu, B				Lin, Qionghua; Fu, Fengming; Shen, Lihua; Zhu, Biao			Pentraxin 3 in the assessment of ventilator-associated pneumonia: An early marker of severity	HEART & LUNG			English	Article						Ventilator-associated pneumonia; Pentraxin 3; C-reactive protein	C-REACTIVE PROTEIN; CRITICALLY-ILL PATIENTS; REGULATES TISSUE FACTOR; ACUTE LUNG INJURY; LONG PENTRAXIN; INNATE IMMUNITY; MYOCARDIAL-INFARCTION; CLOTTING ACTIVATION; PULMONARY INFECTION; ORGAN FAILURE	Objectives: The aim was to assess the diagnostic and prognostic value of measuring pentraxin 3 (PTX3) together with C-reactive protein (CRP) in patients with ventilator-associated pneumonia (VAP). Background: The PTX3 values increase rapidly during multiple inflammatory conditions, but little is known about its characteristics in VAP. Methods: Measurement of PTX3 and CRP levels in plasma from 136…	[Lin, Qionghua; Zhu, Biao] Fudan Univ, Dept Anaesthesia Crit Care & Pain Med, Zhongshan Hosp, Shanghai 200032, Peoples R China; [Lin, Qionghua; Fu, Fengming; Shen, Lihua] Fudan Univ, Shanghai Canc Ctr, Dept Anaesthesia Crit Care & Pain Med, Shanghai 200032, Peoples R China	Zhu, B (reprint author), Fudan Univ, Dept Anaesthesia Crit Care & Pain Med, Zhongshan Hosp, 180 Fenglin Rd, Shanghai 200032, Peoples R China.	zhubiaozs@yahoo.com.cn						35	5	5	MOSBY-ELSEVIER	NEW YORK	360 PARK AVENUE SOUTH, NEW YORK, NY 10010-1710 USA	0147-9563			HEART LUNG	Heart Lung	MAR-APR	2013	42	2					139
J	Wang, C; Zhang, GX; Lu, FL; Li, BL; Zou, LJ; Han, L; Xu, ZY				Wang, Chong; Zhang, Guan-xin; Lu, Fang-lin; Li, Bai-ling; Zou, Liang-jian; Han, Lin; Xu, Zhi-yun			A local risk prediction model for prolonged ventilation after adult heart valve surgery in a Chinese single center	HEART & LUNG			English	Article						Risk model; Ventilation; Valve; Cardiac surgery	ARTERY-BYPASS-SURGERY; CARDIAC-SURGERY; MECHANICAL VENTILATION; CARDIOVASCULAR-SURGERY; RESPIRATORY-FAILURE; THORACIC SURGEONS; MORTALITY; EXTUBATION; MORBIDITY; OUTCOMES	Background and Aim of the Study: The aim of this study was to develop a logistic risk prediction model for prolonged ventilation after adult heart valve surgery. Materials and Methods: This is a retrospective observational study of collected data on 3965 consecutive patients older than 18 years, who had undergone heart valve surgery between January 2000 and December 2010. Data were randomly split…	[Wang, Chong; Zhang, Guan-xin; Lu, Fang-lin; Li, Bai-ling; Zou, Liang-jian; Han, Lin; Xu, Zhi-yun] Second Mil Med Univ, Changhai Hosp, Dept Cardiothorac Surg, Shanghai 200433, Peoples R China	Han, L (reprint author), Second Mil Med Univ, Changhai Hosp, Dept Cardiothorac Surg, 168 Changhai Rd, Shanghai 200433, Peoples R China.	sh_hanlin@hotmail.com; zhiyunx@hotmail.com						23	1	1	MOSBY-ELSEVIER	NEW YORK	360 PARK AVENUE SOUTH, NEW YORK, NY 10010-1710 USA	0147-9563	1527-3288		HEART LUNG	Heart Lung	JAN-FEB	2013	42	1					13
J	Shen, HX; Edwards, H; Courtney, M; McDowell, J; Wei, J				Shen, Huixia; Edwards, Helen; Courtney, Mary; McDowell, Jan; Wei, Juan			Barriers and facilitators to diabetes self-management: Perspectives of older community dwellers and health professionals in China	INTERNATIONAL JOURNAL OF NURSING PRACTICE			English	Article						barriers; Chinese; diabetes; facilitators; self-management	RANDOMIZED CONTROLLED-TRIAL; AFRICAN-AMERICANS; LATINO ADULTS; CARE PROGRAM; INTERVENTION; EDUCATION; ILLNESS; WOMEN; LIFE; PARTICIPANTS	Little is known about self-management among people with Type 2 diabetes living in mainland China. Understanding the experiences of this target population is needed to provide socioculturally relevant education to effectively promote self-management. The aim of this study was to explore perceived barriers and facilitators to diabetes self-management for both older community dwellers and health pro…	[Shen, Huixia; Wei, Juan] Tongji Univ, Sch Med, Dept Nursing, Shanghai 200070, Peoples R China; [Edwards, Helen; Courtney, Mary; McDowell, Jan] Queensland Univ Technol, Inst Hlth & Biomed Innovat, Sch Nursing & Midwifery, Brisbane, Qld 4001, Australia	Shen, HX (reprint author), Tongji Univ, Sch Med, Dept Nursing, 1238 Gonghexin Rd, Shanghai 200070, Peoples R China.	shhx@tongji.edu.cn						54	4	4	WILEY-BLACKWELL	HOBOKEN	111 RIVER ST, HOBOKEN 07030-5774, NJ USA	1322-7114	1440-172X		INT J NURS PRACT	Int. J. Nurs. Pract.	DEC	2013	19	6					627
J	Gu, CY; Wu, XD; Ding, Y; Zhu, XL; Zhang, Z				Gu, Chunyi; Wu, Xiaodan; Ding, Yan; Zhu, Xinli; Zhang, Zheng			The effectiveness of a Chinese midwives' antenatal clinic service on childbirth outcomes for primipare: A randomised controlled trial	INTERNATIONAL JOURNAL OF NURSING STUDIES			English	Article						Antenatal clinic; Caesarean section; Maternal satisfaction; Midwife; Model of care	MIDWIFERY-LED CARE; CASELOAD MIDWIFERY; MANAGED CARE; CONTINUITY; WOMEN; VIEWS; BIRTH; DELIVERY; MOTHERS; SATISFACTION	Background: Antenatal care is an important component of maternity care. In many parts of the world, midwives are the primary caregivers for childbearing women, providing a high level of continuity of care during a normal pregnancy. While in China, obstetricians are the primary providers of antenatal care for all childbearing women; and midwives only provide intrapartum care to labouring women. To…	[Gu, Chunyi; Wu, Xiaodan; Ding, Yan] Fudan Univ, Obstet & Gynaecol Hosp, Dept Nursing, Shanghai 200433, Peoples R China; [Zhu, Xinli] Fudan Univ, Obstet & Gynaecol Hosp, Obstet Out Patient Clin, Shanghai 200433, Peoples R China; [Zhang, Zheng] Fudan Univ, Obstet & Gynaecol Hosp, Labour Unit, Shanghai 200433, Peoples R China	Gu, CY (reprint author), Fudan Univ, Obstet & Gynaecol Hosp, Dept Nursing, Shanghai 200433, Peoples R China.	guchunyi@hotmail.com			Nursing School of Fudan University Fund [FNF201004]	The Nursing School of Fudan University Fund supported the research and governed the progress and review of this study (No. FNF201004).		50	1	1	PERGAMON-ELSEVIER SCIENCE LTD	OXFORD	THE BOULEVARD, LANGFORD LANE, KIDLINGTON, OXFORD OX5 1GB, ENGLAND	0020-7489	1873-491X		INT J NURS STUD	Int. J. Nurs. Stud.	DEC	2013	50	12					1689
J	He, T; Du, Y; Wang, L; Zhong, ZF; Ye, XC; Liu, XH				He, T.; Du, Y.; Wang, L.; Zhong, Z. F.; Ye, X. C.; Liu, X. H.			Perceptions of caring in China: patient and nurse questionnaire survey	INTERNATIONAL NURSING REVIEW			English	Article						Caring; China; Nurses; Patients; Perception	BEHAVIORS; CARE	Background: The concept of caring is important to both patients and nurses. If patients and nurses perceive caring behaviours differently, patients may not have their needs met or will be dissatisfied with the nursing. Aim: This study conducted in mainland China compared the perceptions of nurses and patients concerning nurses' caring behaviours. Methods: From November 2011 to June 2012, 680 pati…	[He, T.; Ye, X. C.; Liu, X. H.] Second Mil Med Univ, Sch Nursing, Shanghai 200433, Peoples R China; [Wang, L.] Shanghai Jiao Tong Univ, Sch Nursing, Shanghai 200030, Peoples R China; [He, T.] Peoples Hosp Zhongshan City, Dept Nursing, Zhongshan, Guangdong, Peoples R China; [Du, Y.] Peoples Hosp Zhongshan City, Dept Human Resource, Zhongshan, Guangdong, Peoples R China; [Zhong, Z. F.] Peoples Hosp…	Liu, XH (reprint author), Second Mil Med Univ, Sch Nursing, 800 Xiangyin Rd, Shanghai 200433, Peoples R China.	ye_xch8639@163.com; xhliu@smmu.edu.cn			National Natural Science Foundation of China [71073169]	The research was funded by the National Natural Science Foundation of China, no. 71073169.		28	0	1	WILEY-BLACKWELL	HOBOKEN	111 RIVER ST, HOBOKEN 07030-5774, NJ USA	0020-8132	1466-7657		INT NURS REV	Int. Nurs. Rev.	DEC	2013	60	4					487
J	Chen, WT; Lee, SY; Shiu, CS; Simoni, JM; Pan, CE; Bao, MJ; Lu, HZ				Chen, Wei-Ti; Lee, Shih-Yu; Shiu, Cheng-Shi; Simoni, Jane M.; Pan, Chengen; Bao, Meijuan; Lu, Hongzhou			Fatigue and sleep disturbance in HIV-positive women: a qualitative and biomedical approach	JOURNAL OF CLINICAL NURSING			English	Article						China; fatigue; HIV; sleep disturbance; women	STRESSFUL LIFE EVENTS; DEPRESSION; HIV/AIDS; SUPPORT; CANCER; ADULTS; HEALTH; CARE	Aims and objectives This study explores how sleep and energy levels were affected in Chinese women diagnosed with HIV in China employing the Actiwatch actigraphy system to collect data on the women's sleep characteristics. Background The worldwide AIDS pandemic, a major impetus behind the recent focus on global aspects of health, is one area in which the behavioural and biomedical expertise of nu…	[Chen, Wei-Ti] Yale Univ, Sch Nursing, New Haven, CT 06536 USA; [Lee, Shih-Yu] Georgia State Univ, Byrdine F Lewis Sch Nursing, Atlanta, GA 30303 USA; [Shiu, Cheng-Shi] Univ Chicago, Sch Social Serv Adm, Chicago, IL 60637 USA; [Simoni, Jane M.] Univ Washington, Dept Psychol, Seattle, WA 98195 USA; [Pan, Chengen; Bao, Meijuan; Lu, Hongzhou] Shanghai Publ Hlth Clin Ctr, Shanghai, Peoples R China	Lu, HZ (reprint author), 2901 Caolang Rd, Shanghai 201508, Peoples R China.	luhongzhou@fudan.edu.cn			University of Washington Center for AIDS Research (CFAR), an NIH [P30 AI027757]; NIH Institute and Center (NIAID); NIH Institute and Center (NCI); NIH Institute and Center (NIMH); NIH Institute and Center (NIDA); NIH Institute and Center (NICHD); NIH Institute and Center (NHLBI); NIH Institute and Center (NCCAM); University of Washington's (UW) School of Nursing Research & Intramural Funding Prog…	This publication resulted (in part) from research supported by the University of Washington Center for AIDS Research (CFAR), an NIH funded program (P30 AI027757), which is supported by the following NIH Institutes and Centers (NIAID, NCI, NIMH, NIDA, NICHD, NHLBI, NCCAM) through an international pilot grant awarded to Dr Wei-Ti Chen and by the University of Washington's (UW) School of Nursing Res…		29	0	0	WILEY-BLACKWELL	HOBOKEN	111 RIVER ST, HOBOKEN 07030-5774, NJ USA	0962-1067			J CLIN NURS	J. Clin. Nurs.	MAY	2013	22	42257					1262
J	Bai, JB; Hsu, LL				Bai, Jinbing; Hsu, Lily			Pain status and sedation level in Chinese children after cardiac surgery: an observational study	JOURNAL OF CLINICAL NURSING			English	Article						analgesics; cardiac surgery; children; intensive care unit; pain; sedation level	PEDIATRIC INTENSIVE-CARE; CRITICALLY-ILL CHILDREN; POSTOPERATIVE ANALGESIA; MANAGEMENT; INFANTS; MORPHINE; SCALE; RELAXATION; BLOCKADE; UNIT	Aims and objectives. This study explored current pain status, sedation level and their trajectories in Chinese children after cardiac surgery. Background. Pain and sedation management are fundamental care practices in the critical care setting, yet they both are frequently under-implemented for children after major surgery. Design. Repeated observational design. Methods. This study was conducted …	[Hsu, Lily] Shanghai Jiao Tong Univ, Sch Nursing, Shanghai 200025, Peoples R China; [Bai, Jinbing] Tianjin Med Univ, Sch Nursing, Tianjin, Peoples R China	Hsu, LL (reprint author), Shanghai Jiao Tong Univ, Sch Nursing, 227 Chong Qing Nan Rd, Shanghai 200025, Peoples R China.	lilyhsu@projecthope.org.cn						57	1	4	WILEY-BLACKWELL	HOBOKEN	111 RIVER ST, HOBOKEN 07030-5774, NJ USA	0962-1067			J CLIN NURS	J. Clin. Nurs.	JAN	2013	22	42006					137
J	Yu, DH; Zhang, YQ; Xu, Y; Wu, JM; Wang, CF				Yu, Dehong; Zhang, Yaqing; Xu, Yun; Wu, Juemin; Wang, Caifeng			Improvement in Critical Thinking Dispositions of Undergraduate Nursing Students Through Problem-Based Learning: A Crossover-Experimental Study	JOURNAL OF NURSING EDUCATION			English	Article							MEDICAL-STUDENTS; SKILLS; PERCEPTIONS; KNOWLEDGE; CHINA	Critical thinking (CT) is important to nursing education and practice. Although there is evidence that active learning approaches, such as problem-based learning (PBL), are effective in developing CT dispositions, the findings are inconclusive. This study examines the effect of PBL on the development of CT dispositions in nursing students using a crossover-experimental study in a course offered t…	[Yu, Dehong; Zhang, Yaqing; Xu, Yun; Wu, Juemin; Wang, Caifeng] Shanghai Jiao Tong Univ, Sch Nursing, Shanghai 200025, Peoples R China	Zhang, YQ (reprint author), Shanghai Jiao Tong Univ, Sch Nursing, Room 211,Block 1,227 South Chongqing Rd, Shanghai 200025, Peoples R China.	zhangyqf@aliyun.com			Education Scientific Research Project of Shanghai [B11032]; Shanghai Universities Undergraduate for Teaching and Learning, Centered on Teaching Reformation Fund [201123]	This study was supported by a grant from the Education Scientific Research Project of Shanghai (B11032), as well as a grant from Shanghai Universities Undergraduate for Teaching and Learning, Centered on Teaching Reformation Fund (201123).		31	1	3	SLACK INC	THOROFARE	6900 GROVE RD, THOROFARE, NJ 08086 USA	0148-4834	1938-2421		J NURS EDUC	J. Nurs. Educ.	OCT	2013	52	10					574
J	Jiang, H; Ye, WQ; Gu, Y				Jiang Hui; Ye Wenqin; Gu Yan			Family-paid caregivers in hospital health care in China	JOURNAL OF NURSING MANAGEMENT			English	Article						family-paid caregivers; inpatient nursing care; nurses; nursing management; nursing quality; questionnaire survey	SKILL MIX; NURSE; OUTCOMES; WORKFORCE; EDUCATION; IMPACT	AimThe aims of this study were to identify the attitudes and perceptions of nurses towards family-paid caregivers, to examine the roles of caregivers in hospital bedside nursing care and to describe the supervision of family-paid caregivers by nurses. BackgroundThe inadequacy of nurse staffing and the Chinese tradition emphasising family responsibility have established family-paid caregivers as a…	[Jiang Hui; Ye Wenqin] Second Mil Med Univ, Changhai Hosp, Shanghai, Peoples R China; [Ye Wenqin] Shanghai Nursing Assoc, Shanghai, Peoples R China; [Gu Yan] Tongji Univ, Sch Med, East Hosp, Shanghai 200092, Peoples R China	Ye, WQ (reprint author), 168 Changhai Rd, Shanghai 200433, Peoples R China.	wq1718@163.com						24	0	0	WILEY-BLACKWELL	HOBOKEN	111 RIVER ST, HOBOKEN 07030-5774, NJ USA	0966-0429	1365-2834		J NURS MANAGE	J. Nurs. Manag.	NOV	2013	21	8			SI		1026
J	Cao, XY; Liu, XH; Tian, L; Guo, YQ				Cao, Xiao Yi; Liu, Xiao Hong; Tian, Lang; Guo, Yan Qin			The reliability and validity of the Chinese version of nurses' self-concept questionnaire	JOURNAL OF NURSING MANAGEMENT			English	Article						nurses; psychometric assessment; reliability; self-concept; validity	JOB-SATISFACTION; HOSPITAL NURSES; FIT INDEXES; SAMPLE-SIZE; MODEL; VALIDATION; INSTRUMENT; RETENTION; BURNOUT; NEED	cao x.y., Liu X.H., tian l. & guo y.q. (2013) Journal of Nursing Management21, 657667 The reliability and validity of the Chinese version of nurses' self-concept questionnaire Aim To examine the reliability and validity of the Chinese version of nurses' self-concept questionnaire. Background Nurses' self-concept is important to alleviate the current shortage of nurses. Nurses' self-concept questi…	[Cao, Xiao Yi; Liu, Xiao Hong] Second Mil Med Univ, Sch Nursing, Shanghai 200433, Peoples R China; [Tian, Lang] Sichuan Canc Hosp, Dept Hepatobiliary Surg, Chengdu, Sichuan, Peoples R China; [Guo, Yan Qin] Huazhong Univ Sci & Technol, Dept Digest Syst, Tongji Hosp, Wuhan 430074, Hubei, Peoples R China	Liu, XH (reprint author), Second Mil Med Univ, Sch Nursing, 800 Xiangyin Rd, Shanghai 200433, Peoples R China.	xhliu@smmu.edu.cn			Municipal Education Commission, Shanghai, China [B903]	This project was supported by Municipal Education Commission, Shanghai, China (B903).		58	0	0	WILEY-BLACKWELL	HOBOKEN	111 RIVER ST, HOBOKEN 07030-5774, NJ USA	0966-0429			J NURS MANAGE	J. Nurs. Manag.	MAY	2013	21	4			SI		657
J	Guijarro, P; Wang, Y; Ying, YT; Yao, YN; Xiong, JY; Yuan, XB				Guijarro, Patricia; Wang, Yi; Ying, Yanting; Yao, Yini; Xiong Jieyi; Yuan, Xiaobing			In Vivo Knockdown of cKit Impairs Neuronal Migration and Axonal Extension in the Cerebral Cortex	JOURNAL OF PEDIATRIC ONCOLOGY NURSING			English	Article						cKit; SCF; cortex; radial neuronal migration; callosal projection	STEM-CELL FACTOR; C-KIT RECEPTOR; RADIAL MIGRATION; CORTICAL-NEURONS; TYROSINE KINASE; GERM-CELLS; ACTIVATING MUTATIONS; HEMATOPOIETIC-CELLS; SIGNAL-TRANSDUCTION; NERVOUS-SYSTEM	The tyrosine kinase receptor cKit and its ligand stem cell factor (SCF) are well known mediators in proliferation, survival, and positive chemotaxis of different cell types in the hematopoietic system. However, and in spite of previous reports showing robust expression of cKit and SCF in the brain during development, their possible function in the cerebral cortex has not been clarified. In this s…	[Guijarro, Patricia; Wang, Yi; Ying, Yanting; Yao, Yini; Yuan, Xiaobing] SIBS, Inst Neurosci ION, State Key Lab Neurosci, Shanghai 200031, Peoples R China; [Guijarro, Patricia; Xiong Jieyi] SIBS, CAS MPG Partner Inst Computat Biol PICB, Shanghai 200031, Peoples R China	Guijarro, P (reprint author), SIBS, Inst Neurosci ION, State Key Lab Neurosci, Shanghai 200031, Peoples R China.	patricia@picb.ac.cn			973 project [2011CBA00400]; The National Natural Science Foundation of China [31021063]	Contract grant sponsor: 973 project; contract grant number: 2011CBA00400.Contract grant sponsor: The National Natural Science Foundation of China; contract grant number: 31021063.		77	1	1	SAGE PUBLICATIONS INC	THOUSAND OAKS	2455 TELLER RD, THOUSAND OAKS, CA 91320 USA	1043-4542	1532-8457		J PEDIATR ONCOL NURS	J. Pediatr. Oncol. Nurs.	SEP	2013	30	5					871
J	Li, J; Zhou, LS; Zhu, DQ; Hu, C; Zhang, XY; Xu, Y				Li, Juan; Zhou, Lanshu; Zhu, Daqiao; Hu, Chen; Zhang, Xiaoyun; Xu, Yan			Chinese version of the nursing students' perception of instructor caring (C-NSpIC): Assessment of reliability and validity	NURSE EDUCATION TODAY			English	Article						Reliability; Validity; Nursing students perceptions of instructor caring; China	INSTRUMENT; SCALE; VALUES	Background: The nursing students' perceptions of instructor caring (NSPIC) is an instrument to assess the influence of caring interactions between students and faculty on students' ability to care. However, the validity and reliability of the Chinese version has not yet been studied. Objectives: The study aimed to assess the validity and reliability of the Chinese version of NSPIC (C-NSPIC). Desi…	[Li, Juan; Zhou, Lanshu; Zhu, Daqiao; Hu, Chen; Zhang, Xiaoyun; Xu, Yan] Second Mil Med Univ, Sch Nursing, Shanghai 200433, Peoples R China	Zhou, LS (reprint author), Second Mil Med Univ, Sch Nursing, Room 208,800 Xiangyin Rd, Shanghai 200433, Peoples R China.	lanshu1970@126.com			Tenth People Hospital in Shanghai; Changhai Hospital; Changzheng Hospital	We would like to acknowledge the excellent cooperation from the Changhai Hospital, Changzheng Hospital, and the Tenth People Hospital in Shanghai for their support. We also thank all the participants in this study.		40	0	0	CHURCHILL LIVINGSTONE	EDINBURGH	JOURNAL PRODUCTION DEPT, ROBERT STEVENSON HOUSE, 1-3 BAXTERS PLACE, LEITH WALK, EDINBURGH EH1 3AF, MIDLOTHIAN, SCOTLAND	0260-6917	1532-2793		NURS EDUC TODAY	Nurse Educ. Today	DEC	2013	33	12					1482
J	Guo, YJ; Shen, J; Ye, XC; Chen, HL; Jiang, AL				Guo, Yujie; Shen, Jie; Ye, Xuchun; Chen, Huali; Jiang, Anli			The design and testing of a caring teaching model based on the theoretical framework of caring in the Chinese Context: A mixed-method study	NURSE EDUCATION TODAY			English	Article						Caring teaching model; Theoretical framework of caring; Curricula; Caring character	NURSING-EDUCATION; NARRATIVE PEDAGOGY; EXPERIENCES; CURRICULUM; STUDENTS; TAIWAN	Aim: This paper aims to report the design and test the effectiveness of an innovative caring teaching model based on the theoretical framework of caring in the Chinese context. Background: Since the 1970's, caring has been a core value in nursing education. In a previous study, a theoretical framework of caring in the Chinese context is explored employing a grounded theory study, considered benef…	[Guo, Yujie; Shen, Jie; Ye, Xuchun; Chen, Huali; Jiang, Anli] Second Mil Med Univ, Sch Nursing, Shanghai 200433, Peoples R China	Jiang, AL (reprint author), Second Mil Med Univ, Sch Nursing, 800 Xiangyin Rd, Shanghai 200433, Peoples R China.	yujieguo73@yahoo.com.cn; shenjie0801@yahoo.com.cn; ye_xch03@yahoo.com.cn; dogccgirl@msn.com; alj1018@yahoo.com.cn			funds of Shanghai key subject building project [B903]; Shanghai educational science project; Shanghai philosophy and social science educational project [A1114]	The financial support of the research was provided by funds of Shanghai key subject building project (B903), Shanghai educational science project and Shanghai philosophy and social science educational project (A1114).		43	0	2	CHURCHILL LIVINGSTONE	EDINBURGH	JOURNAL PRODUCTION DEPT, ROBERT STEVENSON HOUSE, 1-3 BAXTERS PLACE, LEITH WALK, EDINBURGH EH1 3AF, MIDLOTHIAN, SCOTLAND	0260-6917			NURS EDUC TODAY	Nurse Educ. Today	AUG	2013	33	8					912
J	Wang, JK; Zhao, XD				Wang, Jikun; Zhao, Xudong			Perceived family functioning in depressed Chinese couples: A cross-sectional study	NURSING & HEALTH SCIENCES			English	Article						Beck Depression Inventory; Chinese; depression; Family Assessment Device; family functioning	PARENTAL DEPRESSION; PSYCHOLOGICAL SYMPTOMS; CONDUCT DISTURBANCE; ASSESSMENT DEVICE; MOOD DISORDERS; ADOLESCENTS; TRANSMISSION; ENVIRONMENT; CHILDREN; WOMEN	This study investigated family functioning in Chinese couples with a first episode of major depression, and in normal controls, and examined the association between depression severity and family impairment. Seventy-four patients with a first episode of major depression and 73 normal controls, together with their respective spouses, were assessed using the Family Assessment Device and Beck Depres…	[Wang, Jikun; Zhao, Xudong] Tongji Univ, Sch Med, Shanghai East Hosp, Dept Psychosomat Med, Shanghai 200092, Peoples R China	Wang, JK (reprint author), Tongji Univ, Siping Rd 1239,POB 244, Shanghai 200092, Peoples R China.	liwangjk@gmail.com			Ministry of Science and Technology in China [2009BAI77B05]	This study was supported by a grant from the Ministry of Science and Technology in China (no. 2009BAI77B05).		31	1	1	WILEY-BLACKWELL	HOBOKEN	111 RIVER ST, HOBOKEN 07030-5774, NJ USA	1441-0745			NURS HEALTH SCI	Nurs. Health Sci.	MAR	2013	15	1					9
J	Cui, J; Zhou, LJ; Zhang, LJ; Li, L; Zhao, JJ				Cui, Jing; Zhou, Lingjun; Zhang, Lingjuan; Li, Li; Zhao, Jijun			Training the Trainer: An Educational Course for Training Pain Nursing Specialists Supported by the International Association for the Study of Pain (IASP)	PAIN MANAGEMENT NURSING			English	Article							MONITORING PROGRAM; NURSES; KNOWLEDGE; MANAGEMENT; ATTITUDES	To train pain nursing specialists through a pain education program, 20 nurses from six hospitals in Shanghai Province and seven in six provinces of China received the training of 2-month pain education and 4-month clinical practice. This nonrandomized pilot study examined the results of tests before and after the program, case report evaluations, future plan evaluations, clinical practice, and sa…	[Cui, Jing; Zhou, Lingjun] Second Mil Med Univ, Sch Nursing, Changhai Hosp, Shanghai, Peoples R China; [Zhang, Lingjuan; Zhao, Jijun] Second Mil Med Univ, Changhai Hosp, Dept Nursing, Shanghai, Peoples R China; [Li, Li] Second Mil Med Univ, Eastern Hepatobiliary Surg Hosp, Intens Care Unit, Shanghai, Peoples R China	Zhao, JJ (reprint author), Second Mil Med Univ, Changhai Hosp, Dept Nursing, 168 Changhai Rd, Shanghai, Peoples R China.	jcui83@yahoo.com.cn			IASP	Supported by a project grant from IASP.		29	0	1	ELSEVIER SCIENCE INC	NEW YORK	360 PARK AVE SOUTH, NEW YORK, NY 10010-1710 USA	1524-9042	1532-8635		PAIN MANAG NURS	Pain Manag. Nurs.	DEC	2013	14	4					E142
J	Zhang, Y; Wei, M; Han, HR; Zhang, YQ; Shen, NP				Zhang, Ying; Wei, Min; Han, Hae-Ra; Zhang, Yaqing; Shen, Nanping			Testing the Applicability of the Family Management Style Framework to Chinese Families	WESTERN JOURNAL OF NURSING RESEARCH			English	Article						family management; chronic disease; child; structural equation modeling; family functioning	HEALTH-CARE; CHRONIC ILLNESS; CHILDREN; PARENTS; NORMALIZATION; PERCEPTIONS; BANGLADESH; DISEASE; STRESS; CANCER	Family management is an important concept in caring for chronically ill children. The purpose of this study is to determine the applicability of the Family Management Style Framework for Chinese families with a child who has a chronic condition. The children ranged in age from 6 to 16 years. The structural equation modeling approach was utilized to examine the relationships among the contextual v…	[Zhang, Ying; Zhang, Yaqing] Shanghai Jiao Tong Univ, Sch Nursing, Shanghai 200025, Peoples R China; [Wei, Min] Beijing Union Med Coll Hosp, Beijing, Peoples R China; [Han, Hae-Ra] Johns Hopkins Univ, Sch Nursing, Baltimore, MD USA; [Shen, Nanping] Shanghai Jiao Tong Univ, Sch Med, Dept Nursing, Shanghai Childrens Med Ctr, Shanghai 200025, Peoples R China	Zhang, Y (reprint author), Shanghai Jiao Tong Univ, Sch Nursing, 227 South Chong Qing Rd, Shanghai 200025, Peoples R China.	zhying@shsmu.edu.cn			Shanghai Educational Committee [12YS029]; Shanghai Key Discipline Construction Project; Shanghai Jiao Tong University, School of Medicine [YZ1016, JYh1008]	The author(s) disclosed receipt of the following financial support for the research, authorship, and/or publication of this article: This study was supported by a grant from Shanghai Educational Committee (Fund Code: 12YS029), Shanghai Key Discipline Construction Project, and from Shanghai Jiao Tong University, School of Medicine (Fund Code: YZ1016 & JYh1008).		43	0	0	SAGE PUBLICATIONS INC	THOUSAND OAKS	2455 TELLER RD, THOUSAND OAKS, CA 91320 USA	0193-9459			WESTERN J NURS RES	West. J. Nurs. Res.	AUG	2013	35	7					920
J	Dang, J; Zhang, JT; Guo, ZW; Lu, WH; Cai, J; Shi, ZY; Zhang, C				Dang, Jin; Zhang, Jiangtao; Guo, Zhongwei; Lu, Weihong; Cai, Jun; Shi, Zhongying; Zhang, Chen			A Pilot Study of iPad-Assisted Cognitive Training for Schizophrenia	ARCHIVES OF PSYCHIATRIC NURSING			English	Article							WORKING-MEMORY; REMEDIATION; IMPAIRMENT; DISORDER; ADULTS; CORE	In this pilot study, we aimed to examine whether iPad-assisted cognitive training could be beneficial in ameliorating some of the cognitive impairment that accompany schizophrenia. Totally, 20 first-episode schizophrenia patients were randomly assigned to an experiment group (with cognitive training) or to a control group (without cognitive training). The N-back task was assessed at baseline and …	[Dang, Jin; Lu, Weihong; Cai, Jun; Shi, Zhongying; Zhang, Chen] Shanghai Jiao Tong Univ, Sch Med, Shanghai Mental Hlth Ctr, Shanghai 200030, Peoples R China; [Zhang, Jiangtao; Guo, Zhongwei] Tongde Hosp Zhejiang Prov, Hangzhou, Zhejiang, Peoples R China; [Zhang, Chen] Chinese Acad Sci & Yunnan Prov, Kunming Inst Zool, Key Lab Anim Models & Human Dis Mechanisms, Kunming 650223, Yunnan, Peoples R C…	Zhang, C (reprint author), Shanghai Jiao Tong Univ, Sch Med, Shanghai Mental Hlth Ctr, Shanghai 200030, Peoples R China.	ssc.1@163.com; zhangchen645@gmail.com			National Natural Science Foundation of China [81000581]; China Postdoctoral Science Foundation [2013 M530410]; Shanghai Science & Technology Development Foundation [12140904200]; National Key Clinical Disciplines at Shanghai Mental Health Center (OMA-MH) [2011-873]	We are deeply grateful to all participants. This work was supported by the National Natural Science Foundation of China (81000581), China Postdoctoral Science Foundation (2013 M530410), Shanghai Science & Technology Development Foundation (12140904200) and National Key Clinical Disciplines at Shanghai Mental Health Center (OMA-MH, 2011-873).		21	3	3	W B SAUNDERS CO-ELSEVIER INC	PHILADELPHIA	1600 JOHN F KENNEDY BOULEVARD, STE 1800, PHILADELPHIA, PA 19103-2899 USA	0883-9417	1532-8228		ARCH PSYCHIAT NURS	Arch. Psychiatr. Nurs.	JUN	2014	28	3					197
J	Jia, SM; Wang, L; Shi, YJ				Jia, Shoumei; Wang, Ling; Shi, Yingjuan			Relationship Between Parenting and Proactive Versus Reactive Aggression Among Chinese Preschool Children	ARCHIVES OF PSYCHIATRIC NURSING			English	Article							CONDUCT PROBLEMS; EXTERNALIZING BEHAVIORS; PHYSICAL AGGRESSION; MIDDLE CHILDHOOD; PREDICTORS; TEMPERAMENT; SCHOOL; HARSH; SOCIALIZATION; ASSOCIATIONS	This study examines the relationship between parenting and proactive versus reactive aggression among preschool children in China. Children (1164) from 10 kindergartens in Shanghai were rated by their parents and teachers using the Parent Behavior Inventory (PBI) and the Aggressive Behavior Teacher's Checklist. Children had higher levels of reactive than proactive aggression, and older children a…	[Jia, Shoumei] Fudan Univ, Sch Nursing, Shanghai 200032, Peoples R China; [Wang, Ling] Fudan Univ, Sch Publ Hlth, Shanghai 200032, Peoples R China; [Shi, Yingjuan] Putuo Mental Hlth Ctr, Shanghai 200065, Peoples R China	Wang, L (reprint author), Fudan Univ, Sch Publ Hlth, 130 Dong An Rd, Shanghai 200032, Peoples R China.	jiashm@fudan.edu.cn; lingwang@fudan.edu.cn; 179011037@qq.com			Shanghai Municipal Health Bureau, Shanghai, P.R.C. [12GWZX0301]	We are grateful to the parents and children who participated in this study. We are also grateful to the administrators and teachers in the kindergartens who participated in this study and helped in the processes of data collection. This research project was supported by award number 12GWZX0301 from Shanghai Municipal Health Bureau, Shanghai, P.R.C.		45	0	0	W B SAUNDERS CO-ELSEVIER INC	PHILADELPHIA	1600 JOHN F KENNEDY BOULEVARD, STE 1800, PHILADELPHIA, PA 19103-2899 USA	0883-9417	1532-8228		ARCH PSYCHIAT NURS	Arch. Psychiatr. Nurs.	APR	2014	28	2					152
J	Ye, JF; Betran, AP; Vela, MG; Souza, JP; Zhang, J				Ye, Jiangfeng; Betran, Ana Pilar; Vela, Miguel Guerrero; Souza, Joao Paulo; Zhang, Jun			Searching for the Optimal Rate of Medically Necessary Cesarean Delivery	BIRTH-ISSUES IN PERINATAL CARE			English	Article						cesarean delivery; infant mortality; maternal mortality; neonatal mortality	NEONATAL-MORTALITY; VAGINAL BIRTHS; SECTION RATES; RISK; INFANTS; HEALTH; WOMEN	Background: Over the past three decades, the World Health Organization expert panel proposed cesarean delivery rate of 10-15 percent was used as a doctrine for an optimal rate of cesarean delivery despite the lack of concrete evidence. We set out to compile cesarean delivery rates, socioeconomic indicators, and health outcomes by countries in the last three decades to explore the optimal rates fo…	[Ye, Jiangfeng; Betran, Ana Pilar; Vela, Miguel Guerrero; Souza, Joao Paulo; Zhang, Jun] Shanghai Jiao Tong Univ, Sch Med, Xinhua Hosp, Key Lab Childrens Environm Hlth, Shanghai 200092, Peoples R China	Zhang, J (reprint author), Shanghai Jiao Tong Univ, Sch Med, Xinhua Hosp, MOE Shanghai Key Lab Childrens Environm Hlth, 1665 Kong Jiang Rd, Shanghai 200092, Peoples R China.		Souza, Joao Paulo/G-1982-2010	Souza, Joao Paulo/0000-0002-2288-4244				32	9	10	WILEY-BLACKWELL	HOBOKEN	111 RIVER ST, HOBOKEN 07030-5774, NJ USA	0730-7659	1523-536X		BIRTH-ISS PERINAT C	Birth-Issue Perinat. Care	SEP	2014	41	3					237
J	Cui, J; Song, LJ; Zhou, LJ; Meng, H; Zhao, JJ				Cui, J.; Song, L. J.; Zhou, L. J.; Meng, H.; Zhao, J. J.			Needs of family caregivers of advanced cancer patients: a survey in Shanghai of China	EUROPEAN JOURNAL OF CANCER CARE			English	Article						cross-sectional survey; needs; family caregiver; Chinese mainland; advanced cancer	BREAST-CANCER; PALLIATIVE CARE; SUPPORT; BURDEN; HEALTH; INFORMATION; PREVALENCE; IMPACT; MODEL	It is important to understand the unmet needs of family caregivers of advanced cancer patients for developing and refining services to address the identified gaps in cancer care. To explore their needs in Chinese mainland and the possible factors associated with their needs, a self-developed questionnaire was used to survey a sample of 649 participants in 15 hospitals of Shanghai. The data were a…	[Cui, J.; Zhou, L. J.] Second Mil Med Univ, Sch Nursing, Shanghai, Peoples R China; [Song, L. J.] Shanghai Med Coll, Dept Nursing, Shanghai, Peoples R China; [Meng, H.] Second Mil Med Univ, Dept Hlth Stat, Shanghai, Peoples R China; [Zhao, J. J.] Second Mil Med Univ, Dept Nursing, Changhai Hosp, Shanghai, Peoples R China	Zhao, JJ (reprint author), 168 Changhai Rd, Shanghai 200433, Peoples R China.	jcui83@yahoo.com.cn			National Natural Science Foundation of China [70973136]	The study was supported by the National Natural Science Foundation of China (Grant No. 70973136). We are grateful to all the investigators in the 15 hospitals of the survey. The collaboration of all the participants in the study was also valuable and cherished.		48	1	1	WILEY-BLACKWELL	HOBOKEN	111 RIVER ST, HOBOKEN 07030-5774, NJ USA	0961-5423	1365-2354		EUR J CANCER CARE	Eur. J. Cancer Care	JUL	2014	23	4					562
J	Xie, LJ; Xiao, TT; Shen, J				Xie, Lijian; Xiao, Tingting; Shen, Jie			Primary pulmonary vein stenosis in a premature infant without bronchopulmonary dysplasia: A case report	HEART & LUNG			English	Article						Pulmonary vein; Stenosis; Premature		Primary pulmonary vein stenosis (PVS) presenting in childhood is uncommon and is related to premature with bronchopulmonary dysplasia (BPD). Here we present a premature infant with primary PVS and without BPD. In our case, a 19-month-old girl was diagnosed with PVS, atrial septal defect and patent arterial duct by echocardiography and selective pulmonary artery angiography. Interestingly in the f…	[Xie, Lijian; Xiao, Tingting; Shen, Jie] Shanghai Jiao Tong Univ, Shanghai Childrens Hosp, Dept Cardiol, Shanghai 200040, Peoples R China	Shen, J (reprint author), Shanghai Jiao Tong Univ, Shanghai Childrens Hosp, Dept Cardiol, Shanghai 200040, Peoples R China.	she6nt@163.com						11	0	0	MOSBY-ELSEVIER	NEW YORK	360 PARK AVENUE SOUTH, NEW YORK, NY 10010-1710 USA	0147-9563	1527-3288		HEART LUNG	Heart Lung	JUL-AUG	2014	43	4					367
J	Zhang, H; Shan, WY; Jiang, AL				Zhang, Heng; Shan, WeiYing; Jiang, AnLi			The meaning of life and health experience for the Chinese elderly with chronic illness: A qualitative study from positive health philosophy	INTERNATIONAL JOURNAL OF NURSING PRACTICE			English	Article						chronic illness; health; qualitative study; the elderly		Ageing and the concurrent prevalence of chronic disease in older adults produce a great burden and challenge for family, society and individuals. There is a definite need to build the science about caring for older Chinese adults from their perspective to inform health-care professionals. The aim of the study was to investigate the meaning of life and health experience of Chinese elderly with chr…	[Zhang, Heng; Shan, WeiYing; Jiang, AnLi] Secondary Mil Med Univ, Sch Nursing, Shanghai, Peoples R China; [Zhang, Heng] NanJing Univ Chinese Med, Sch Nursing, Nanjing, Jiangsu, Peoples R China	Jiang, AL (reprint author), Secondary Mil Med Univ, Sch Nursing, XiangYin Rd 800, Shanghai, Peoples R China.	alj1018@aliyun.com			[B903]	No conflict of interest has been declared by the author(s). Funded through Shanghai Key Discipline-Grant-In-Aid (B903).		31	0	0	WILEY-BLACKWELL	HOBOKEN	111 RIVER ST, HOBOKEN 07030-5774, NJ USA	1322-7114	1440-172X		INT J NURS PRACT	Int. J. Nurs. Pract.	OCT	2014	20	5					530
J	Qiu, XX; Guo, Y; Fan, HB; Shao, J; Zhang, XB				Qiu, Xiao-xia; Guo, Yan; Fan, Hong-bin; Shao, Jie; Zhang, Xue-bin			Incidence, risk factors and clinical outcomes of peripherally inserted central catheter spontaneous dislodgment in oncology patients: A prospective cohort study	INTERNATIONAL JOURNAL OF NURSING STUDIES			English	Article						Peripherally inserted central catheter; Spontaneous dislodgment; Catheter-related thrombosis; Tip position; Risk factor	CENTRAL VENOUS CATHETERS; SUPERIOR VENA-CAVA; SPONTANEOUS RETRACTION; SPONTANEOUS MIGRATION; INDWELLING CATHETERS; TIP POSITION; COMPLICATIONS; VEIN; HYPERALIMENTATION; COUGH	Purpose: Peripherally inserted central catheter (PICC) spontaneous dislodgment is insidious in onset and prone to cause complications. We performed a prospective cohort study to examine the incidence, risk factors and clinical results of PICC spontaneous dislodgment in oncology patients to facilitate successful early diagnosis, prophylaxis and management. Patients and methods: Consecutive oncolog…	[Qiu, Xiao-xia; Guo, Yan; Fan, Hong-bin; Shao, Jie; Zhang, Xue-bin] Shanghai Jiao Tong Univ, Sch Med, Renji Hosp, Ctr Canc, Shanghai 200127, Peoples R China; [Zhang, Xue-bin] Shanghai Jiao Tong Univ, Sch Med, Renji Hosp, Dept Intervent Radiol, Shanghai 200127, Peoples R China	Zhang, XB (reprint author), Renji Hosp, Dept Intervent Radiol, 1630 Dongfang Rd, Shanghai 200127, Peoples R China.	zhangxuebinwqy@163.com			New Frontier Technology in Shanghai Municipal Hospitals [SHDC12012112]; National Natural Science Foundation of China [81371660]	The authors acknowledge that the present research was supported by Joint Key Project of New Frontier Technology in Shanghai Municipal Hospitals (No. SHDC12012112) and by National Natural Science Foundation of China (No. 81371660).		24	1	1	PERGAMON-ELSEVIER SCIENCE LTD	OXFORD	THE BOULEVARD, LANGFORD LANE, KIDLINGTON, OXFORD OX5 1GB, ENGLAND	0020-7489	1873-491X		INT J NURS STUD	Int. J. Nurs. Stud.	JUL	2014	51	7					955
J	Pu, Y; Cen, G; Sun, J; Gong, J; Zhang, Y; Zhang, M; Wu, X; Zhang, JJ; Qiu, ZJ; Fang, F				Pu, Ying; Cen, Gang; Sun, Jing; Gong, Jin; Zhang, Ying; Zhang, Min; Wu, Xia; Zhang, Junjie; Qiu, Zhengjun; Fang, Fang			Warming with an underbody warming system reduces intraoperative hypothermia in patients undergoing laparoscopic gastrointestinal surgery: A randomized controlled study	INTERNATIONAL JOURNAL OF NURSING STUDIES			English	Article						Hypothermia; Gastrointestinal neoplasm; Laparoscopy; Warming insulation; Blood coagulation disorders; Correlation studies	MILD PERIOPERATIVE HYPOTHERMIA; ABDOMINAL-SURGERY; CARBON-DIOXIDE; BLOOD-LOSS; TEMPERATURE; COAGULOPATHY; ACIDOSIS; PNEUMOPERITONEUM; THERMOREGULATION; REQUIREMENTS	Background: Intraoperative hypothermia is a common event during laparoscopic abdominal surgery. On one hand, intraoperative hypothermia can delay the metabolism and prevent tissue damage. One the other hand, long-term and severe intraoperative hypothermia may also lead to perioperative complications, such as increasing of peripheral resistance, coagulation dysfunction, intraoperative hemorrhage a…	[Pu, Ying; Gong, Jin; Zhang, Ying; Zhang, Min; Wu, Xia; Fang, Fang] Shanghai Jiao Tong Univ, Affiliated Peoples Hosp 1, Dept Nursing, Shanghai 200080, Peoples R China; [Cen, Gang; Qiu, Zhengjun] Shanghai Jiao Tong Univ, Affiliated Peoples Hosp 1, Dept Gen Surg, Shanghai 200080, Peoples R China; [Sun, Jing] Shanghai Jiao Tong Univ, Ruijin Hosp, Dept Gen Surg, Sch Med, Shanghai 200025, Peoples R Ch…	Fang, F (reprint author), Shanghai Jiao Tong Univ, Affiliated Peoples Hosp 1, Dept Nursing, Shanghai 200080, Peoples R China.	fang_fang0604@yahoo.com.cn			Science and Technology Commission of Shanghai Jiao Tong University [Jyh0913]	Funding: This study was supported in part by the Science and Technology Commission of Shanghai Jiao Tong University (Project Grant Jyh0913).		48	2	2	PERGAMON-ELSEVIER SCIENCE LTD	OXFORD	THE BOULEVARD, LANGFORD LANE, KIDLINGTON, OXFORD OX5 1GB, ENGLAND	0020-7489	1873-491X		INT J NURS STUD	Int. J. Nurs. Stud.	FEB	2014	51	2					181
J	Yan, Z; Li, JA; McDonald, T				Yan, Z.; Li, J. An; McDonald, T.			Nursing education development in China (1887-1949): influences on contemporary nursing	INTERNATIONAL NURSING REVIEW			English	Article						China; nursing; nurse education; nursing history; content analysis; historical research; nursing development; Modern China		Background: On 8 May 2013, the Chinese Nursing Association joined the International Council of Nurses. It is hoped that by sharing the history of nursing in China, scholars globally can incorporate into current thinking the challenges that Chinese nurses have faced in pursuing educational development and professional acknowledgement. Aim: To review the history of nurse education in China between …	[Yan, Z.; Li, J. An] Second Mil Med Univ, Sch Nursing, Shanghai, Peoples R China; [McDonald, T.] Australian Catholic Univ, Sydney, NSW, Australia	Li, JA (reprint author), 800 Xiang Yin Rd, Shanghai 200433, Peoples R China.	alj1018@yahoo.com.cn			Foundation of Shanghai Key Discipline [B903]	This study was funded by the Foundation of Shanghai Key Discipline (B903).		29	0	0	WILEY-BLACKWELL	HOBOKEN	111 RIVER ST, HOBOKEN 07030-5774, NJ USA	0020-8132	1466-7657		INT NURS REV	Int. Nurs. Rev.	SEP	2014	61	3					380
J	Zhang, Y; Wei, M; Zhang, YQ; Shen, NP				Zhang, Ying; Wei, Min; Zhang, Yaqing; Shen, Nanping			Chinese family management of chronic childhood conditions: A cluster analysis	JOURNAL FOR SPECIALISTS IN PEDIATRIC NURSING			English	Article						Child functioning; children; chronic condition; cluster analysis; family functioning; family management style	DEPRESSIVE SYMPTOMS; STYLE FRAMEWORK; CHILDREN; PARENTS; CARE; LIFE; ARTHRITIS; MOTHERS; STRESS; ASTHMA	PurposeThis study compared the management of chronic childhood conditions in Chinese families and identified predictors of management style. Design and MethodA survey was conducted in 2008-2009 on a convenience sample of 387 caregivers of children with chronic conditions. Results.Six family management styles (FMSs) were identified: accomplished, uncertain managing, joint managing, managing with d…	[Zhang, Ying; Zhang, Yaqing] Shanghai Jiao Tong Univ, Sch Nursing, Shanghai 200030, Peoples R China; [Wei, Min] Beijing Union Med Coll Hosp, Pediat Unit, Beijing, Peoples R China; [Shen, Nanping] Shanghai Jiao Tong Univ, Dept Nursing, Shanghai Childrens Med Ctr, Sch Med, Shanghai 200030, Peoples R China	Zhang, Y (reprint author), Shanghai Jiao Tong Univ, Sch Nursing, Shanghai 200030, Peoples R China.	zhying@shsmu.edu.cn			Sigma Theta Tau International (STTI); International Network for Doctoral Education in Nursing (INDEN)	The author would like to thank Professor Kathleen A. Knafl for critically reviewing the manuscript, and Professor George J. Knafl for substantial assistance with data analysis. The author would also thank Sigma Theta Tau International (STTI) and the International Network for Doctoral Education in Nursing (INDEN) for supporting this postdoctoral training program and providing this opportunity to w…		54	1	1	WILEY-BLACKWELL	HOBOKEN	111 RIVER ST, HOBOKEN 07030-5774, NJ USA	1539-0136	1744-6155		J SPEC PEDIATR NURS	J. Spec. Pediatr. Nurs.	JAN	2014	19	1					39
J	Yang, F; Smith, GD; Liu, XH				Yang, Fang; Smith, Graeme D.; Liu, Xiao-hong			Content validity of the Chinese version of resilience scale for older people	JOURNAL OF CLINICAL NURSING			English	Article						elder care; gerontology; nursing; psychometrics; resilience			[Yang, Fang; Liu, Xiao-hong] Second Miliary Med Univ, Sch Nursing, Shanghai 200433, Peoples R China; [Yang, Fang] Hangzhou Normal Univ, Sch Nursing, Hangzhou, Zhejiang, Peoples R China; [Smith, Graeme D.] Univ Edinburgh, Sch Hlth Social Sci, Edinburgh, Midlothian, Scotland	Liu, XH (reprint author), Second Miliary Med Univ, Sch Nursing, Xiangyin Rd, Shanghai 200433, Peoples R China.	xhliu@smmu.edu.cn			Natural Science Foundation of Zhejiang Province [Y6110673]; Ministry of Education of China [11YJC840062]; Research Center on Aging of Zhejiang Province, China [ZRCA201009]	This work was supported by grants from the Natural Science Foundation of Zhejiang Province, grant number Y6110673; the Ministry of Education of China for financial support, grant number 11YJC840062 and the Research Center on Aging of Zhejiang Province, China, for financial support, grant number ZRCA201009.		5	0	0	WILEY-BLACKWELL	HOBOKEN	111 RIVER ST, HOBOKEN 07030-5774, NJ USA	0962-1067	1365-2702		J CLIN NURS	J. Clin. Nurs.	JUL	2014	23	13-14					2077
J	Zhang, TT; Tang, SS; Fu, LJ				Zhang, Ting-Ting; Tang, Shan-Shan; Fu, Li-Juan			The effectiveness of different concentrations of chlorhexidine for prevention of ventilator-associated pneumonia: a meta-analysis	JOURNAL OF CLINICAL NURSING			English	Review						oral care; chlorhexidine; ventilator-associated pneumonia; prevention	INTENSIVE-CARE-UNIT; PLAQUE ANTISEPTIC DECONTAMINATION; RESPIRATORY-TRACT INFECTIONS; RANDOMIZED CONTROLLED-TRIAL; NOSOCOMIAL PNEUMONIA; ORAL DECONTAMINATION; BACTERIAL-COLONIZATION; HEART-SURGERY; GLUCONATE; RINSE	Aims and objectives To evaluate the effectiveness of chlorhexidine for the prevention of ventilator-associated pneumonia and explore the preferred concentration of chlorhexidine. Background The implementation of effective oral care measures could reduce the incidence of ventilator-associated pneumonia, but among several randomised controlled trials, whether using chlorhexidine is effective and wh…	[Zhang, Ting-Ting; Fu, Li-Juan] Jiao Tong Univ, Sch Med, Shanghai Childrens Med Ctr, Dept Cardiothorac Surg, Shanghai 200127, Peoples R China; [Tang, Shan-Shan] Shanghai Jiao Tong Univ, Sch Nursing, Shanghai 200030, Peoples R China; [Fu, Li-Juan] Shanghai Jiao Tong Univ, Sch Med, Shanghai Childrens Med Ctr, Dept Cardiothorac Surg, Shanghai 200030, Peoples R China	Fu, LJ (reprint author), Jiao Tong Univ, Sch Med, Shanghai Childrens Med Ctr, Dept Cardiothorac Surg, Dongfang Rd 1678, Shanghai 200127, Peoples R China.	flj333@sina.com						42	2	2	WILEY-BLACKWELL	HOBOKEN	111 RIVER ST, HOBOKEN 07030-5774, NJ USA	0962-1067	1365-2702		J CLIN NURS	J. Clin. Nurs.	JUN	2014	23	42320					1461
J	Yi, XL; Chen, J; Li, J; Feng, L; Wang, Y; Zhu, JA; Shen, E; Hu, B				Yi, Xiao-lei; Chen, Jie; Li, Jia; Feng, Liang; Wang, Yan; Zhu, Jia-An; Shen, E.; Hu, Bing			Risk factors associated with PICC-related upper extremity venous thrombosis in cancer patients	JOURNAL OF CLINICAL NURSING			English	Article							INSERTED CENTRAL CATHETERS; RETROSPECTIVE ANALYSIS; VEIN-THROMBOSIS; ADULT PATIENTS; THROMBOEMBOLISM; COMPLICATIONS; INFECTIONS; PLACEMENT; CARE		[Yi, Xiao-lei; Chen, Jie; Li, Jia; Feng, Liang; Wang, Yan; Zhu, Jia-An; Hu, Bing] Shanghai Jiao Tong Univ, Affiliated Peoples Hosp 6, Dept Ultrasound Med, Shanghai 200233, Peoples R China; [Shen, E.] Shanghai Inst Ultrasound Med, Shanghai, Peoples R China	Hu, B (reprint author), Shanghai Jiao Tong Univ, Affiliated Peoples Hosp 6, Shanghai Inst Ultrasound Med, Dept Ultrasound Med, Shanghai 200233, Peoples R China.	us_laura@163.com						26	1	1	WILEY-BLACKWELL	HOBOKEN	111 RIVER ST, HOBOKEN 07030-5774, NJ USA	0962-1067	1365-2702		J CLIN NURS	J. Clin. Nurs.	MAR	2014	23	42130			SI		837
J	Zhao, CY; Tang, R; Wang, JD; Guan, X; Zheng, J; Hu, JY; Hu, GW; Song, C				Zhao, Chunying; Tang, Rui; Wang, Jiandong; Guan, Xiao; Zheng, Jie; Hu, Junyan; Hu, Gaowu; Song, Cong			Six-Step Recanalization Manual Therapy: A Novel Method for Treating Plugged Ducts in Lactating Women	JOURNAL OF HUMAN LACTATION			English	Article						breastfeeding; manual therapy; massage; mastitis; plugged ducts	MILK EJECTION; BREAST; MASTITIS; ENGORGEMENT; MANAGEMENT; PAIN	Background: Plugged ducts are a common, painful condition in lactating women, but no standard treatment is currently available. Objective: This study aimed to evaluate the clinical efficacy of a newly established 6-step recanalization manual therapy (SSRMT) for treating plugged ducts. Methods: This observational study included 3497 lactating women with plugged ducts. The SSRMT comprised the follo…	[Zhao, Chunying; Tang, Rui; Wang, Jiandong; Zheng, Jie; Hu, Junyan; Hu, Gaowu; Song, Cong] Shanghai Univ Tradit Chinese Med, Dept Breast Surg, Shuguang Hosp, Shanghai 201203, Peoples R China; [Guan, Xiao] Chinese Acad Med Sci, Dept Obstet & Gynecol, Peking Union Med Coll Hosp, Beijing 100730, Peoples R China	Zhao, CY (reprint author), Shanghai Univ Tradit Chinese Med, Dept Breast Surg, Shuguang Hosp, 528 Zhangheng Rd, Shanghai 201203, Peoples R China.	cyzhao59@163.com			Traditional Chinese Medicine Science and Technology Fund of Shanghai Municipal Health Bureau [2009S014]	The authors disclosed receipt of the following financial support for the research, authorship, and/or publication of this article: This research was supported by the Traditional Chinese Medicine Science and Technology Fund of Shanghai Municipal Health Bureau, No. 2009S014.		22	0	0	SAGE PUBLICATIONS INC	THOUSAND OAKS	2455 TELLER RD, THOUSAND OAKS, CA 91320 USA	0890-3344	1552-5732		J HUM LACT	J. Hum. Lact.	AUG	2014	30	3					324
J	Gui, L; Gu, S; Barriball, KL; While, AE; Chen, GL				Gui, Li; Gu, Shen; Barriball, K. Louise; While, Alison E.; Chen, Guoliang			The working lives of nurse teachers in mainland China and the United Kingdom: A questionnaire survey	NURSE EDUCATION TODAY			English	Article						Nurse teachers; Job satisfaction; Sense of coherence; Role conflict and role ambiguity; Work empowerment; Professional identification	EMPOWERMENT; EDUCATION	Background: Nurse education has undergone considerable changes creating new opportunities and challenges for nurse teachers. Limited comparative research of the working lives of nurse teachers has been reported, thus similarities and differences that may exist are unidentified. Aim: This paper reports a study of the working lives of nurse teachers in mainland China and the United Kingdom. Design:…	[Gui, Li; Gu, Shen; While, Alison E.] 2nd Mil Med Univ, Sch Nursing, Shanghai 200433, Peoples R China; [Barriball, K. Louise; While, Alison E.] Kings Coll London, Florence Nightingale Sch Nursing & Midwifery, London WC2R 2LS, England; [Chen, Guoliang] 2nd Mil Med Univ, Sch Hlth & Hyg Serv, Shanghai 200433, Peoples R China	Gu, S (reprint author), 2nd Mil Med Univ, Sch Nursing, 800 Xiang Yin Rd, Shanghai 200433, Peoples R China.	guili2000@qq.com; gushen@smmu.edu.cn; louise.barriball@kcl.ac.uk; alison.while@kcl.ac.uk; chenguoliang@smmu.edu.cn			Shanghai Leading Academic Discipline Project [B903]; CSC award	The study was supported by the Shanghai Leading Academic Discipline Project (Grant No. B903) and CSC award.		34	0	0	CHURCHILL LIVINGSTONE	EDINBURGH	JOURNAL PRODUCTION DEPT, ROBERT STEVENSON HOUSE, 1-3 BAXTERS PLACE, LEITH WALK, EDINBURGH EH1 3AF, MIDLOTHIAN, SCOTLAND	0260-6917	1532-2793		NURS EDUC TODAY	Nurse Educ. Today	MAY	2014	34	5					730
J	Liu, JE; Mok, E; Wong, T				Liu, JE; Mok, E; Wong, T			Perceptions of Chinese cancer patients of the favorable and unfavorable words conveyed by their social support providers	CANCER NURSING			English	Article						favorable words; qualitative approach; social support; unfavorable words; verbal communication	BREAST-CANCER; HOPE	The aim of this study is to describe the experience and expectations of Chinese cancer patients with regard to the favorable and unfavorable words conveyed by their social support providers. In-depth interviews were conducted with 20 patients with cancer using a qualitative approach, and the data obtained were analyzed using content analysis. The findings indicated that favorable words inspired p…	Capital Univ Med Sci, Sch Nursing, Beijing 100069, Peoples R China; Hong Kong Polytech Univ, Sch Nursing, Hong Kong, Hong Kong, Peoples R China; Hong Kong Polytech Univ, Fac Hlth & Social Sci, Hong Kong, Hong Kong, Peoples R China	Liu, JE (reprint author), Capital Univ Med Sci, Sch Nursing, Beijing 100069, Peoples R China.	Liujune66@yahoo.com.cn						16	4	4	LIPPINCOTT WILLIAMS & WILKINS	PHILADELPHIA	530 WALNUT ST, PHILADELPHIA, PA 19106-3621 USA	0162-220X			CANCER NURS	Cancer Nurs.	SEP-OCT	2005	28	5					348
J	Liu, JE; Mok, E; Wong, T				Liu, JE; Mok, E; Wong, T			Perceptions of supportive communication in Chinese patients with cancer: experiences and expectations	JOURNAL OF ADVANCED NURSING			English	Article						cancer; communication; emotion; information; interviews; nursing; patient	INFORMATION-SEEKING; NURSES; NEEDS; BEHAVIORS; CARE	Aim: This paper reports the findings of a study exploring the experiences and expectations of patients with cancer of supportive communication in the context of Chinese culture. Background: Patients with cancer experience psychological distress, particularly in the initial period after diagnosis. Supportive communication can positively affect their psychological adjustment. Previous studies have …	Capital Univ Med Sci, Sch Nursing, Beijing 100069, Peoples R China; Hong Kong Polytech Univ, Sch Nursing, Kowloon, Hong Kong, Peoples R China; Hong Kong Polytech Univ, Fac Hlth & Social Sci, Kowloon, Hong Kong, Peoples R China	Liu, JE (reprint author), Capital Univ Med Sci, Sch Nursing, You An Men, Beijing 100069, Peoples R China.	Liujune66@yahoo.com.cn						34	24	25	BLACKWELL PUBLISHING	OXFORD	9600 GARSINGTON RD, OXFORD OX4 2DQ, OXON, ENGLAND	0309-2402			J ADV NURS	J. Adv. Nurs.	NOV	2005	52	3					262
J	Liu, JE; Mok, E; Wong, T				Liu, JE; Mok, E; Wong, T			Caring in nursing: investigating the meaning of caring from the perspective of cancer patients in Beijing, China	JOURNAL OF CLINICAL NURSING			English	Article						cancer; caring; communication; model; nursing; patient	NURSES; BEHAVIORS; PERCEPTIONS; ELISIONS; FIELD; CARE	Aims. The aims of the study were to develop an understanding of caring in nursing from the perspective of cancer patients and attempt to identify the concept of caring in the Chinese cultural context. Background. Caring as a concept remains elusive, the acceptable definitions of the term care have not been reached. The expressions, processes and patterns of caring vary among cultures, but there i…	Capital Univ Med Sci, Sch Nursing, Beijing 100069, Peoples R China; Hong Kong Polytech Univ, Sch Nursing, Hong Kong, Hong Kong, Peoples R China; Hong Kong Polytech Univ, Fac Hlth & Social Sci, Hong Kong, Hong Kong, Peoples R China	Liu, JE (reprint author), Capital Univ Med Sci, Sch Nursing, Beijing 100069, Peoples R China.	liujune66@yahoo.com.cn						32	28	29	BLACKWELL PUBLISHING	OXFORD	9600 GARSINGTON RD, OXFORD OX4 2DQ, OXON, ENGLAND	0962-1067			J CLIN NURS	J. Clin. Nurs.	FEB	2006	15	2					188
J	Chen, WT; Starks, H; Shiu, CS; Fredriksen-Goldsen, K; Simoni, J; Zhang, FJ; Pearson, C; Zhao, HX				Chen, Wei-Ti; Starks, Helene; Shiu, Cheng-Shi; Fredriksen-Goldsen, Karen; Simoni, Jane; Zhang, Fujie; Pearson, Cynthia; Zhao, Hongxin			Chinese HIV-positive patients and their healthcare providers - Contrasting Confucian versus Western notions of secrecy and support	ADVANCES IN NURSING SCIENCE			English	Article						AIDS; China; Confucianism; healthcare provider; HIV disclosure; privacy	ADHERENCE INTERVENTION; MEDICATION ADHERENCE; HIV/AIDS; PRINCIPLES; STRATEGIES; KNOWLEDGE; ATTITUDES; OUTCOMES	In this qualitative study, 29 HIV-positive, Chinese patients reported highly favorable impressions of their healthcare providers, who were seen as providing important medical-related, financial, and emotional support. Generally, the patient-provider relationship positively impacted the participants and their ability to maintain their health and was especially critical when patients were isolated …	Ditan Hosp, AIDS Unit, Beijing 100011, Peoples R China; Univ Washington, Sch Social Work, Dept Family & Child Nursing, Seattle, WA 98195 USA; Univ Washington, Sch Social Work, Dept Med Hist & Eth, Seattle, WA 98195 USA; Univ Washington, Sch Social Work, Dept Psychol, Seattle, WA 98195 USA; Chinese Ctr Dis Control & Prevent, Ntal Ctr AIDS SRD Control & Prevent, Div Treatment & Care, Beijing, Peopl…	Zhao, HX (reprint author), Ditan Hosp, AIDS Unit, 13 Ditan Pk, Beijing 100011, Peoples R China.	zhao_hongxin66@yahoo.com.cn						30	17	17	LIPPINCOTT WILLIAMS & WILKINS	PHILADELPHIA	530 WALNUT ST, PHILADELPHIA, PA 19106-3621 USA	0161-9268			ADV NURS SCI	Adv. Nurs. Sci.	OCT-DEC	2007	30	4					329
J	Liu, JE; Mok, E; Wong, T; Xue, L; Xu, B				Liu, Jun-E; Mok, Esther; Wong, Thomas; Xue, Lan; Xu, Bo			Evaluation of an integrated communication skills training program for nurses in cancer care in Beijing, China	NURSING RESEARCH			English	Article						communication skills; evaluation; training program	EFFICACY; ONCOLOGY; IMPACT; MODEL	Background. Nurses have considerable needs for communication skills training in cancer care because of the general lack of education and training on oncology-specific communication skills in Mainland China. Objectives: To evaluate the effectiveness of an integrated communication skills training program, in which an intensive learning session was combined with practice in the clinical unit to crea…	Capital Med Univ, Sch Nursing, Beijing 100069, Peoples R China; Hong Kong Polytech Univ, Sch Nursing, Hong Kong, Hong Kong, Peoples R China; Hong Kong Polytech Univ, Fac Hlth & Social Sci, Hong Kong, Hong Kong, Peoples R China; Chinese Acad Med Sci, Canc Hosp, Dept Nursing, Beijing 100037, Peoples R China	Liu, JE (reprint author), Capital Med Univ, Sch Nursing, Beijing 100069, Peoples R China.	liujune66@yahoo.com.cn						21	9	10	LIPPINCOTT WILLIAMS & WILKINS	PHILADELPHIA	530 WALNUT ST, PHILADELPHIA, PA 19106-3621 USA	0029-6562			NURS RES	Nurs. Res.	MAY-JUN	2007	56	3					202
J	Wang, XL; Wang, Y; Zanzhou, S; Wang, J; Wang, JL				Wang, Xiaoli; Wang, Yan; Zanzhou, Sui; Wang, Jing; Wang, Jinlan			A population-based survey of women's traditional postpartum behaviours in Northern China	MIDWIFERY			English	Article						postpartum behaviour; doing the month; diet; physical activity; rural China		Objective: to describe patterns of women's postpartum behaviour in the period of 'doing the month' in a Northern rural area in China; and to determine the degree of difference between postpartum behaviour and daily behaviour. Design: a retrospective cross-sectional survey was conducted in May 2004, using a questionnaire previously developed in pilot studies. Setting: Laishui County, Hebei Provinc…	[Wang, Xiaoli; Wang, Yan; Zanzhou, Sui] Peking Univ, Hlth Sci Ctr, Sch Publ Hlth, Div Maternal & Child Hlth, Beijing 100083, Peoples R China; [Wang, Jing; Wang, Jinlan] Maternal & Child Hlth Hosp, Laishui Cty, Hebei Province, Peoples R China	Wang, Y (reprint author), Peking Univ, Hlth Sci Ctr, Sch Publ Hlth, Div Maternal & Child Hlth, 38 Xueyuan Rd,Haidian Dist, Beijing 100083, Peoples R China.	wangyan@bjmu.edu.cn						19	14	16	ELSEVIER SCI LTD	OXFORD	THE BOULEVARD, LANGFORD LANE, KIDLINGTON, OXFORD OX5 1GB, OXON, ENGLAND	0266-6138			MIDWIFERY	Midwifery	JUN	2008	24	2					238
J	Shen, Q; Sherwood, GD; McNeill, JA; Li, Z				Shen, Qu; Sherwood, Gwen D.; McNeill, Jeanette A.; Li, Zheng			Postoperative Pain Management Outcome in Chinese Inpatients	WESTERN JOURNAL OF NURSING RESEARCH			English	Article						postoperative pain; acute pain; Houston Pain Outcome Instrument; Chinese patients; patient satisfaction; quality of care	QUALITY ASSURANCE STANDARDS; PATIENT SATISFACTION; CANCER PAIN; TASK-FORCE; GUIDELINES; EVALUATE	In the absence of pain management outcome reports representing mainland China, the purposes of this study were to describe the outcome of postoperative pain management and the relationship between patient satisfaction and clinical outcomes in an indigenous Chinese population. From a sample of 388 secondday-postoperative inpatients, 304 (78%) reported pain in the past 24 hours and were enrolled in…	[Li, Zheng] Peking Union Med Coll, Sch Nursing, Beijing 100730, Peoples R China; [Shen, Qu] Xiamen Univ, Coll Med, Xiamen, Peoples R China; [Sherwood, Gwen D.] Univ N Carolina, Sch Nursing, Chapel Hill, NC USA; [McNeill, Jeanette A.] Univ Incarnate Word, San Antonio, TX 78209 USA	Li, Z (reprint author), Peking Union Med Coll, Sch Nursing, 9 Dong Dan San Tiao, Beijing 100730, Peoples R China.	zhengli@hotmail.com						41	9	10	SAGE PUBLICATIONS INC	THOUSAND OAKS	2455 TELLER RD, THOUSAND OAKS, CA 91320 USA	0193-9459			WESTERN J NURS RES	West. J. Nurs. Res.	DEC	2008	30	8					975
J	Wang, X; Dai, S; Zhang, Z; Liu, L; Wang, J; Xiao, X; He, D; Liu, B				Wang, X.; Dai, S.; Zhang, Z.; Liu, L.; Wang, J.; Xiao, X.; He, D.; Liu, B.			Characterization of apolipoprotein A-I as a potential biomarker for cholangiocarcinoma	EUROPEAN JOURNAL OF CANCER CARE			English	Article						cholangiocarcinoma; ApoA-I; serum biomarkers; SELDI-TOF-MS	HIGH-DENSITY LIPOPROTEINS; OVARIAN-CANCER; LUNG-CANCER; SERUM; IDENTIFICATION; EXPRESSION; PROTEIN; TRANSTHYRETIN; CARCINOMA; ISOFORM	Serum samples from 60 cholangiocarcinoma (CC), 60 benign diseases of hepatobiliary and 53 normal individuals were analysed by SELDI-TOF-MS (Surface Enhanced Laser Desorption/Ionization Time of Flight Mass Spectrometry). It was found that a 28 k m/z peak was significantly decreased in CC and retained discriminatory value between CC and normal group, also between CC and benign groups. Then 1-D, 2-D…	[Wang, X.; Dai, S.; Zhang, Z.; Liu, L.; Wang, J.; Xiao, X.; He, D.] Univ Confederated Inst Prote, Beijing, Peoples R China; [Xiao, X.] Beijing Normal Univ, Minist Educ, Key Lab Cell Proliferat & Regulat Biol, Beijing 100875, Peoples R China; [Liu, B.] Gen Hosp Chinese Peoples Liberat Army, Dept Hepatobiliary Surg, Beijing, Peoples R China	Xiao, X (reprint author), Beijing Normal Univ, Minist Educ, Key Lab Cell Proliferat & Regulat Biol, 19th Xin Jie Kou Wai da Jie, Beijing 100875, Peoples R China.	xyxiao@bnu.edu.cn; dhe@bnu.edu.cn			Major State Basic Research Program of China [2006CB910100]; Natural Science Foundation of Beijing [7051002]; Science Technology Committee of Beijing [Y0204002040111]	This work was supported in part by a Special Grant of the Major State Basic Research Program of China (2006CB910100), Project Supported by Natural Science Foundation of Beijing (7051002) and Project Supported by Science Technology Committee of Beijing (Y0204002040111).		30	19	19	WILEY-BLACKWELL PUBLISHING, INC	MALDEN	COMMERCE PLACE, 350 MAIN ST, MALDEN 02148, MA USA	0961-5423			EUR J CANCER CARE	Eur. J. Cancer Care	NOV	2009	18	6					625
J	Su, CY; Lu, XH; Chen, W; Wang, T				Su, Chun-Yan; Lu, Xin-Hong; Chen, Wei; Wang, Tao			Promoting self-management improves the health status of patients having peritoneal dialysis	JOURNAL OF ADVANCED NURSING			English	Article						health status; peritoneal dialysis; quality of life; rehabilitation; renal nursing; self-efficacy; self-management	STAGE RENAL-DISEASE; PRIMARY-CARE; EFFICACY	Promoting self-management improves the health status of patients having peritoneal dialysis. This paper is a report of a study conducted to explore the effects of promoting self-management on the well-being of patients having peritoneal dialysis. Peritoneal dialysis is a home-based treatment for end-stage renal disease. Promoting self-management has been shown to improve the health status of peop…	[Su, Chun-Yan; Lu, Xin-Hong; Chen, Wei; Wang, Tao] Peking Univ, Hosp 3, Div Nephrol, Beijing 100871, Peoples R China	Wang, T (reprint author), Peking Univ, Hosp 3, Div Nephrol, Beijing 100871, Peoples R China.	wangt@bjmu.edu.cn			Cheung Kong Scholar Programme; Ministry of Education, China [36-1]; Doctors' Foundation of the Ministry of Education, China	This study was supported by a grant from Cheung Kong Scholar Programme, Ministry of Education, China (36-1) and the Doctors' Foundation of the Ministry of Education, China.		25	7	9	WILEY-BLACKWELL PUBLISHING, INC	MALDEN	COMMERCE PLACE, 350 MAIN ST, MALDEN 02148, MA USA	0309-2402			J ADV NURS	J. Adv. Nurs.	JUL	2009	65	7					1381
J	Liu, HP; Liehr, P				Liu, Huaping; Liehr, Patricia			Instructive messages from Chinese nurses' stories of caring for SARS patients	JOURNAL OF CLINICAL NURSING			English	Article						China; critical care; nurses; nursing; qualitative; SARS	ACUTE RESPIRATORY SYNDROME; HONG-KONG; OUTBREAK; QUARANTINE; TAIWAN; EPIDEMIC; TORONTO; RISK	Aim. To identify instructive messages to guide nursing practice in future epidemics by examining the stories of Chinese nurses who cared for severe acute respiratory syndrome (SARS) patients. Background. Mainland China had three outbreaks of SARS between November 2002-May 2004 and suffered the greatest impact on morbidity and mortality worldwide. Most of the nursing-related literature about SARS …	[Liu, Huaping] Peking Union Med Coll, Sch Nursing, Beijing 1000010, Peoples R China; [Liehr, Patricia] Florida Atlantic Univ, Christine E Lynn Coll Nursing, Boca Raton, FL 33431 USA	Liu, HP (reprint author), Peking Union Med Coll, Sch Nursing, 190 A Chao Nei Da Jie, Beijing 1000010, Peoples R China.	huapingliu@nursing.pumc.edu.cn						24	0	0	WILEY-BLACKWELL PUBLISHING, INC	MALDEN	COMMERCE PLACE, 350 MAIN ST, MALDEN 02148, MA USA	0962-1067			J CLIN NURS	J. Clin. Nurs.	OCT	2009	18	20					2880
J	Pang, D; Senaratana, W; Kunaviktikul, W; Klunklin, A; McElmurry, BJ				Pang, Dong; Senaratana, Wilawan; Kunaviktikul, Wipada; Klunklin, Areewan; McElmurry, Beverly J.			Nursing values in China: The expectations of registered nurses	NURSING & HEALTH SCIENCES			English	Article						China; nursing values; qualitative research; registered nurses	HEALTH SYSTEM; PERCEPTIONS; ETHICS	The purpose of this study was to identify the essential professional values of Chinese nurses and their manifestations in the current health-care environment. Data were collected from 29 nurse experts by semi-structured individual interviews or focus groups in Beijing and Shanghai, China. Thematic analysis was used to analyze the data. Seven themes were identified: altruism, caring, trustworthine…	[Pang, Dong] Peking Univ, Sch Nursing, Beijing 100191, Peoples R China; [Pang, Dong; Senaratana, Wilawan; Kunaviktikul, Wipada; Klunklin, Areewan] Chiang Mai Univ, Fac Nursing, Chiang Mai, Thailand; [McElmurry, Beverly J.] Univ Illinois, Coll Nursing, Chicago, IL USA	Pang, D (reprint author), Peking Univ, Sch Nursing, 38 Xueyuan Rd, Beijing 100191, Peoples R China.	pangdong12@gmail.com			Faculty of Nursing, Chiang Mai University, Thailand; China Medical Board, USA; Graduate School at Chiang Mai University, Thailand	The authors are grateful to all participants and directors of the nursing departments for their cooperation, and thank Dr. Linda McCreary at College of Nursing, University of Illinois at Chicago for her assistance in qualitative data analysis. This research was funded by both the Faculty of Nursing, Chiang Mai University, Thailand, provided by the China Medical Board, USA, and the Graduate School…		33	1	1	WILEY-BLACKWELL PUBLISHING, INC	MALDEN	COMMERCE PLACE, 350 MAIN ST, MALDEN 02148, MA USA	1441-0745			NURS HEALTH SCI	Nurs. Health Sci.	SEP	2009	11	3					312
J	An, FR; Xiang, YT; Lu, JY; Lai, KYC; Ungvari, GS				An, Feng-Rong; Xiang, Yu-Tao; Lu, Jin-Yan; Lai, Kelly Y. C.; Ungvari, Gabor S.			Falls in a Psychiatric Institution in Beijing, China	PERSPECTIVES IN PSYCHIATRIC CARE			English	Article						China; fall; inpatient; psychiatric disorder; psychotropic medication	SOCIAL DETERMINANTS; SCHIZOPHRENIA; INPATIENTS; CONSEQUENCES; COMMUNITY; RISK	PURPOSE. This study aimed to determine the rate of falls and their relationship with sociodemographic and clinical factors in a psychiatric institution in Beijing, China. DESIGN AND METHODS. The case notes of 7,921 inpatients were scrutinized to identify patients who fell while in the hospital. FINDINGS. The fall rate in this study was 1.2% of all inpatients. Nearly all (89.7%) falls occurred whe…	[An, Feng-Rong; Xiang, Yu-Tao] Capital Med Univ, Beijing Anding Hosp, Beijing, Peoples R China; [Xiang, Yu-Tao; Lu, Jin-Yan; Lai, Kelly Y. C.; Ungvari, Gabor S.] Chinese Univ Hong Kong, Dept Psychiat, Hong Kong, Hong Kong, Peoples R China	An, FR (reprint author), Capital Med Univ, Beijing Anding Hosp, Beijing, Peoples R China.				National Natural Science Foundation of China [30800367]; Beijing Nova Program of Beijing Municipal Science and Technology Commission [2008B59]	This study was supported by grants from the National Natural Science Foundation of China (No. 30800367, from March 2008 to February 2011) and Beijing Nova Program of Beijing Municipal Science and Technology Commission (No. 2008B59, from January 2008 to December 2010)		28	5	5	WILEY-BLACKWELL PUBLISHING, INC	MALDEN	COMMERCE PLACE, 350 MAIN ST, MALDEN 02148, MA USA	0031-5990			PERSPECT PSYCHIATR C	Perspect. Psychiatr. Care	JUL	2009	45	3					183
J	Ma, X; Xiang, YT; Cai, ZJ; Lu, JY; Li, SR; Xiang, YQ; Guo, HL; Hou, YZ; Li, ZB; Li, ZJ; Tao, YF; Dang, WM; Wu, XM; Deng, J; Lai, KYC; Ungvari, GS				Ma, Xin; Xiang, Yu-Tao; Cai, Zhuo-Ji; Lu, Jin-Yan; Li, Shu-Ran; Xiang, Ying-Qiang; Guo, Hong-Li; Hou, Ye-Zhi; Li, Zhen-Bo; Li, Zhan-Jiang; Tao, Yu-Fen; Dang, Wei-Min; Wu, Xiao-Mei; Deng, Jing; Lai, Kelly Y. C.; Ungvari, Gabor S.			Generalized Anxiety Disorder in China: Prevalence, Sociodemographic Correlates, Comorbidity, and Suicide Attempts	PERSPECTIVES IN PSYCHIATRIC CARE			English	Article						China; generalized anxiety disorder; prevalence; treatment	DIAGNOSTIC INTERVIEW; MENTAL-DISORDERS; NATIONAL-SURVEY; CO-MORBIDITY; RISK-FACTORS; COMMUNITY; HEALTH; SCHIZOPHRENIA; DEPRESSION; VALIDITY	This study aims to determine the 12-month and lifetime prevalence of generalized anxiety disorder (GAD) and its sociodemographic correlates. A total of 5,926 subjects were randomly selected and interviewed. The overall 12-month and lifetime prevalence of GAD was 0.8%, and 1.2%, respectively. Being older than 25 years and female, lower education level, unemployed status, and lower (< RMB500/month)…	[Ma, Xin; Xiang, Yu-Tao; Cai, Zhuo-Ji; Xiang, Ying-Qiang; Guo, Hong-Li; Hou, Ye-Zhi; Li, Zhen-Bo; Li, Zhan-Jiang; Tao, Yu-Fen; Wu, Xiao-Mei; Deng, Jing] Capital Med Univ, Beijing Anding Hosp, Beijing, Peoples R China; [Xiang, Yu-Tao; Lu, Jin-Yan; Lai, Kelly Y. C.; Ungvari, Gabor S.] Chinese Univ Hong Kong, Dept Psychiat, Hong Kong, Hong Kong, Peoples R China; [Li, Shu-Ran; Dang, Wei-Min] Peking U…	Ma, X (reprint author), Capital Med Univ, Beijing Anding Hosp, Beijing, Peoples R China.	xyutly@cuhk.edu.hk			Beijing Municipal Science and Technology Commission [H010910130112-200100528]	This study was supported by a grant from the Beijing Municipal Science and Technology Commission (No. H010910130112-200100528). The use of the Chinese version of CIDI 1.0, which was validated at the Institute of Mental Health, Beijing University, was authorized by the World Health Organization. The authors would like to thank all the subjects and the mental health professionals who were involved …		37	7	11	WILEY-BLACKWELL PUBLISHING, INC	MALDEN	COMMERCE PLACE, 350 MAIN ST, MALDEN 02148, MA USA	0031-5990			PERSPECT PSYCHIATR C	Perspect. Psychiatr. Care	APR	2009	45	2					119
J	Wu, LP				Wu, Liping			A Survey on the Knowledge, Attitude, and Behavior Regarding Contraception Use Among Pregnant Teenagers in Beijing, China	CLINICAL NURSING RESEARCH			English	Article						pregnancy in adolescence; contraception; China; abortion	SEX-EDUCATION; RANDOMIZED-TRIAL; PROGRAM; SHANGHAI; MODEL; RISK	Teenage pregnancy is an important public health issue in the world. However, little is known about the knowledge, attitudes, and behaviors related to contraception among pregnant teenagers in China. The aim of this study was to investigate the knowledge, attitudes, and behaviors related to contraception among pregnant teenagers. From April 2007 to June 2007, an investigator designed questionnaire…	Peking Union Med Coll, Sch Nursing, Beijing 100730, Peoples R China	Wu, LP (reprint author), Peking Union Med Coll, Sch Nursing, 9 Dongdansantiao, Beijing 100730, Peoples R China.	kathywuliping@yahoo.com.cn						21	1	1	SAGE PUBLICATIONS INC	THOUSAND OAKS	2455 TELLER RD, THOUSAND OAKS, CA 91320 USA	1054-7738			CLIN NURS RES	Clin. Nurs. Res.	NOV	2010	19	4					403
J	Shen, ZL; Wang, S; Ye, YJ; Wang, YL; Sun, KK; Yang, XD; Jiang, KW				Shen, Z. L.; Wang, S.; Ye, Y. J.; Wang, Y. L.; Sun, K. K.; Yang, X. D.; Jiang, K. W.			Carcinosarcoma of pancreas with liver metastasis combined with gastrointestinal stromal tumour of the stomach: is there a good prognosis with the complete resection?	EUROPEAN JOURNAL OF CANCER CARE			English	Article						carcinosarcoma; pancreas; neoplasm; spindle cell sarcoma; adenocarcinoma; gastrointestinal stromal tumour; treatment	GIANT-CELL TUMOR; MUCINOUS CYSTIC NEOPLASM	We report a carcinosarcoma of the pancreas with liver metastasis combined with gastrointestinal stromal tumour (GIST) of the stomach in a 72-year-old woman who presented with right upper quadrant pain, nausea and vomiting. A radical resection including pancreaticoduodenectomy, left hepatic lobe resection and local resection of the gastric mass was performed. The tumour in the head of pancreas was…	[Shen, Z. L.; Wang, S.; Ye, Y. J.; Wang, Y. L.; Yang, X. D.; Jiang, K. W.] Peking Univ, Peoples Hosp, Dept Surg Gastroenterol, Beijing 100044, Peoples R China; [Sun, K. K.] Peking Univ, Peoples Hosp, Dept Pathol, Beijing 100044, Peoples R China	Wang, S (reprint author), Peking Univ, Peoples Hosp, Dept Surg Gastroenterol, Beijing 100044, Peoples R China.	shwang60@sina.com						21	5	5	WILEY-BLACKWELL PUBLISHING, INC	MALDEN	COMMERCE PLACE, 350 MAIN ST, MALDEN 02148, MA USA	0961-5423			EUR J CANCER CARE	Eur. J. Cancer Care	JAN	2010	19	1					118
J	Ji, F; Wang, ZG; Wu, JM; Gao, XA; Chen, X				Ji, Feng; Wang, Zhong-gao; Wu, Ji-min; Gao, Xiang; Chen, Xiu			The Stretta Procedure Eliminates Arrhythmia Due to Gastroesophageal Reflux Disease	GASTROENTEROLOGY NURSING			English	Article							LOWER ESOPHAGEAL SPHINCTER; RADIOFREQUENCY ENERGY DELIVERY; JUNCTION; ASTHMA; GERD	A significant percentage of patients with gastroesophageal reflux disease may experience extraesophageal manifestations, such as chest pain or asthma. These symptoms are more difficult to diagnose than the usual esophageal symptoms. The aim of this article is to characterize the extraesophageal manifestations in patients with gastroesophageal reflux disease and report the effects of the Stretta p…	[Ji, Feng; Wang, Zhong-gao; Gao, Xiang] Capital Univ Med Sci, Xuan Wu Hosp, Thorac & Cardiovasc Surg Dept, Beijing 100053, Peoples R China; [Ji, Feng; Wang, Zhong-gao; Wu, Ji-min; Gao, Xiang; Chen, Xiu] Second Artillery Gen Hosp, Ctr GERD, Beijing, Peoples R China	Wang, ZG (reprint author), Capital Univ Med Sci, Xuan Wu Hosp, Thorac & Cardiovasc Surg Dept, 45 Changchun St, Beijing 100053, Peoples R China.	zhonggaowang@yahoo.com						9	0	0	LIPPINCOTT WILLIAMS & WILKINS	PHILADELPHIA	530 WALNUT ST, PHILADELPHIA, PA 19106-3621 USA	1042-895X			GASTROENTEROL NURS	Gastroenterol. Nurs.	SEP-OCT	2010	33	5					344
J	Li, MZ; Li, LP; Fan, XZ				Li, Mingzi; Li, Liping; Fan, Xiaozhi			Patients having haemodialysis: physical activity and associated factors	JOURNAL OF ADVANCED NURSING			English	Article						Chinese; haemodialysis; health status; nursing; physical activity	STAGE RENAL-DISEASE; QUALITY-OF-LIFE; EXERCISE CAPACITY; PROGRAM; REHABILITATION; DIALYSIS; HEALTH	P>Title. Patients having haemodialysis: physical activity and associated factors. Aim. This paper is a report of a study exploring the physical activity status of Beijing patients having haemodialysis and its associated factors. Background. Inactivity is widely regarded as a risk factor for the development and progression of chronic diseases. Patients having dialysis could obtain important health…	[Li, Mingzi; Li, Liping] Peking Univ, Sch Nursing, Beijing 100871, Peoples R China; [Fan, Xiaozhi] Peking Univ, Peoples Hosp, Beijing 100871, Peoples R China	Li, MZ (reprint author), Peking Univ, Sch Nursing, Beijing 100871, Peoples R China.	limingzi@bjmu.edu.cn						31	6	10	WILEY-BLACKWELL	MALDEN	COMMERCE PLACE, 350 MAIN ST, MALDEN 02148, MA USA	0309-2402			J ADV NURS	J. Adv. Nurs.	JUN	2010	66	6					1338
J	Chen, WT; Shiu, CS; Simoni, J; Fredriksen-Goldsen, K; Zhang, FJ; Zhao, HX				Chen, Wei-Ti; Shiu, Cheng-Shi; Simoni, Jane; Fredriksen-Goldsen, Karen; Zhang, Fujie; Zhao, Hongxin			Optimizing HIV care by expanding the nursing role: patient and provider perspectives	JOURNAL OF ADVANCED NURSING			English	Article						AIDS; HIV; labour division; nursing role; patient perspectives; provider perspectives	MAINLAND CHINA; HIV/AIDS; NURSES; ATTITUDES; CONFUCIAN; SUPPORT; SERVICE; PEOPLE; STIGMA; AIDS	Title. Optimizing HIV care by expanding the nursing role: patient and provider perspectives. Aim. This paper is a report of a study conducted to explore HIV healthcare services from the perspectives of both healthcare providers and patients in order to understand how to optimize HIV nursing care. Background. In China, healthcare providers usually first diagnose HIV in a general hospital. Then, HI…	[Zhao, Hongxin] Capital Med Univ, Inst Infect Dis, AIDS Unit, Ditan Hosp, Beijing, Peoples R China; [Chen, Wei-Ti] Univ Washington, Sch Nursing, Dept Family & Child Nursing, Seattle, WA 98195 USA; [Shiu, Cheng-Shi] Univ Chicago, Sch Social Serv Adm, Chicago, IL 60637 USA; [Simoni, Jane] Univ Washington, Dept Psychol, Seattle, WA 98195 USA; [Fredriksen-Goldsen, Karen] Univ Washington, Sch Social W…	Zhao, HX (reprint author), Capital Med Univ, Inst Infect Dis, AIDS Unit, Ditan Hosp, Beijing, Peoples R China.	zhao_hongxin66@yahoo.com.cn			U.S. National Institute of Mental Health [R34-MH074364, R34MH074364-S1]; University of Washington; School of Nursing; Research & Intramural Funding Program	This study was supported by R34-MH074364 and R34MH074364-S1 from the U.S. National Institute of Mental Health (NIMH). WC was partially funded by University of Washington, School of Nursing, Research & Intramural Funding Program during preparation of the paper during summer of 2009.		34	4	4	WILEY-BLACKWELL PUBLISHING, INC	MALDEN	COMMERCE PLACE, 350 MAIN ST, MALDEN 02148, MA USA	0309-2402			J ADV NURS	J. Adv. Nurs.	FEB	2010	66	2					260
J	Guo, GF; Phillips, LR; Reed, PG				Guo, Guifang; Phillips, Linda R.; Reed, Pamela G.			End-of-Life Caregiver Interactions With Health Care Providers Learning From the Bad	JOURNAL OF NURSING CARE QUALITY			English	Article						elderly people; end-of-life care; family; caregiver; interaction; nonhospice settings; quality of care	PALLIATIVE CARE; COMMUNICATION; PHYSICIANS; FAMILIES; HOSPICE	This qualitative study examined caregivers' perceptions of and stories about their interactions with nonhospice health care providers. The sample included 27 family caregivers who provided the majority of in-home physical care and emotional support to the elders for at least 6 months. Caregivers described some startling interactions that suggest the need to reevaluate health care professionals' a…	[Guo, Guifang] Peking Univ, Hlth Sci Ctr, Sch Nursing, Beijing 100191, Peoples R China; [Phillips, Linda R.] Univ Calif Los Angeles, Sch Nursing, Ctr Adv Gerontol Nursing, Los Angeles, CA 90024 USA; [Reed, Pamela G.] Univ Arizona, Coll Nursing, Tucson, AZ 85721 USA	Guo, GF (reprint author), Peking Univ, Hlth Sci Ctr, Sch Nursing, 38 Xueyuan Rd, Beijing 100191, Peoples R China.	gfguo@yahoo.com						27	2	2	LIPPINCOTT WILLIAMS & WILKINS	PHILADELPHIA	530 WALNUT ST, PHILADELPHIA, PA 19106-3621 USA	1057-3631			J NURS CARE QUAL	J. Nurs. Care Qual.	OCT-DEC	2010	25	4					334
J	Liu, JE; Zhang, Y; Zhang, J; Dong, PL; Chen, M; Duan, ZP				Liu, Jun-E; Zhang, Yan; Zhang, Jing; Dong, Pei-Ling; Chen, Ming; Duan, Zhong-Ping			Probiotic Yogurt Effects on Intestinal Flora of Patients with Chronic Liver Disease	NURSING RESEARCH			English	Article						intestinal flora imbalance; probiotics; yogurt	BIFIDOBACTERIA	Background: Patients with chronic liver disease generally have intestinal flora imbalance that is related to the development and worsening of the disease. Objective: The purpose of this study was to evaluate the effects of probiotic yogurt on intestinal flora of patients with chronic liver disease. Methods: A randomized controlled trial, pretest-posttest control group design, was used. Patients w…	[Liu, Jun-E; Zhang, Yan] Capital Med Univ, Sch Nursing, Beijing, Peoples R China; [Zhang, Jing; Dong, Pei-Ling; Chen, Ming; Duan, Zhong-Ping] Beijing Youan Hosp, Beijing, Peoples R China	Liu, JE (reprint author), Capital Med Univ, Sch Nursing, Beijing, Peoples R China.	liujune66@yahoo.com.cn			Capital Medical University [2006JL59]	This study was funded by the Basic-Clinical Cooperation Program of Capital Medical University (grant no. 2006JL59).		16	5	6	LIPPINCOTT WILLIAMS & WILKINS	PHILADELPHIA	530 WALNUT ST, PHILADELPHIA, PA 19106-3621 USA	0029-6562			NURS RES	Nurs. Res.	NOV-DEC	2010	59	6					426
J	Guo, GF; Phillips, LR				Guo, Guifang; Phillips, Linda R.			Conceptualization and Nursing Implications of Self-Imposed Activity Limitation Among Community-Dwelling Elders	PUBLIC HEALTH NURSING			English	Article						community-dwelling elders; compensation; conceptualization; envisioned self; self-efficacy; self-imposed activity limitation	PHYSICAL-ACTIVITY; LIFE-MANAGEMENT; OLDER-ADULTS; COMPENSATION; OPTIMIZATION; SELECTION; STRATEGIES; EXERCISE; PEOPLE; HEALTH	The purposes of this paper are to explore, from a theoretical perspective, explanations for why some community-dwelling elders self-impose activity limitations (SIALs); to develop an integrated explanation for SIAL from a nursing perspective; and to identify some clinical implications of relevance to public health nursing practice. Activity limitation is an important risk factor for functional de…	[Guo, Guifang] Peking Univ, Sch Nursing, Beijing 100871, Peoples R China; [Phillips, Linda R.] Univ Calif Los Angeles, Sch Nursing, Ctr Advancement Gerontol Nursing, Los Angeles, CA 90024 USA	Guo, GF (reprint author), Nursing Bldg 205,38 Xueyuan Rd, Beijing 100191, Peoples R China.	gfguo@yaoo.com						30	1	2	WILEY-BLACKWELL	MALDEN	COMMERCE PLACE, 350 MAIN ST, MALDEN 02148, MA USA	0737-1209			PUBLIC HEALTH NURS	Public Health Nurs.	JUL-AUG	2010	27	4					353
J	Han, J; Liu, JE; Xiao, QA; Zheng, XL; Ma, YH; Ding, YM				Han, Jing; Liu, Jun-E; Xiao, Qian; Zheng, Xiao-Lei; Ma, Yue-Hong; Ding, Yan-Ming			The Experiences and Feelings of Chinese Children Living With Leukemia A Qualitative Study	CANCER NURSING			English	Article						Children; Experience; Feelings; Hospitalization; Leukemia; Qualitative research	ACUTE LYMPHOBLASTIC-LEUKEMIA; LONG-TERM SURVIVORS; CHILDHOOD-CANCER; ADJUSTMENT; ILLNESS; LIMITATIONS; THERAPY	Background: Leukemia is the most common pediatric malignancy. Many children with leukemia display behavioral and emotional problems. Promoting children's psychological development and quality of life during hospitalization is an important activity carried out by health professionals. Objective: The objective of this study was to describe the experiences and feelings of Chinese children with leuke…	[Han, Jing; Liu, Jun-E; Xiao, Qian] Capital Med Univ, Sch Nursing, Beijing 100069, Peoples R China; [Zheng, Xiao-Lei] Peking Univ, Peoples Hosp, Beijing, Peoples R China; [Ma, Yue-Hong; Ding, Yan-Ming] Peking Univ, Hosp 1, Beijing 100871, Peoples R China	Liu, JE (reprint author), Capital Med Univ, Sch Nursing, Beijing 100069, Peoples R China.	liujune66@yahoo.com.cn			Beijing Municipal Commission of Education [SM200810025004]	This study was supported by Beijing Municipal Commission of Education in 2008 (SM200810025004).		31	4	4	LIPPINCOTT WILLIAMS & WILKINS	PHILADELPHIA	530 WALNUT ST, PHILADELPHIA, PA 19106-3621 USA	0162-220X			CANCER NURS	Cancer Nurs.	MAR-APR	2011	34	2					134
J	Kang, XF; Li, Z; Nolan, MT				Kang, Xiaofeng; Li, Zheng; Nolan, Marie T.			Informal Caregivers' Experiences of Caring for Patients With Chronic Heart Failure Systematic Review and Metasynthesis of Qualitative Studies	JOURNAL OF CARDIOVASCULAR NURSING			English	Review						caregivers; heart failure; qualitative research	CARE; INTERVENTION; MANAGEMENT; SUPPORT	Background: Increasing evidence suggests that family support for patients with chronic heart failure (CHF) contributes greatly to the disease management of CHF. In addition, the quality of the CHF patient's close personal relationships can influence CHF outcomes. However, caregivers cannot provide care alone and need guidance, support, and skills to manage care that is often complex. In this arti…	[Kang, Xiaofeng; Li, Zheng] Peking Union Med Coll, Sch Nursing, Beijing 100730, Peoples R China; [Nolan, Marie T.] Johns Hopkins Univ, Sch Nursing, Baltimore, MD USA	Li, Z (reprint author), Peking Union Med Coll, Sch Nursing, 9 Dong Dan San Tiao, Beijing 100730, Peoples R China.	zhengli@hotmail.com			China Medical Board [08-886]	This work was supported by China Medical Board (grant 08-886).		33	9	9	LIPPINCOTT WILLIAMS & WILKINS	PHILADELPHIA	530 WALNUT ST, PHILADELPHIA, PA 19106-3621 USA	0889-4655			J CARDIOVASC NURS	J. Cardiovasc. Nurs.	SEP-OCT	2011	26	5					386
J	Guo, AM; Han, JN; Leidy, NK; Wu, ZL; Wang, P; Lin, YX				Guo, Ai-Min; Han, Jiang-Na; Leidy, Nancy Kline; Wu, Zheng-Lai; Wang, Ping; Lin, Ying-Xiang			Validation of the Chinese version of the Functional Performance Inventory Short Form in patients with chronic obstructive pulmonary disease	JOURNAL OF CLINICAL NURSING			English	Article						chronic obstructive pulmonary disease; Chinese; functional performance; measure; reliability; validity	6-MINUTE WALK TEST; HEALTH-STATUS; OUTCOME MEASURE; TASK-FORCE; DYSPNEA; QUESTIONNAIRE; PEOPLE; COPD; PREVALENCE; FRAMEWORK	Aims and objective. To determine the reliability and validity of the Chinese version of the Functional Performance Inventory Short Form (FPI-SF-C) in patients with chronic obstructive pulmonary disease in Beijing, China. Background. The Functional Performance Inventory Short Form (FPI-SF) is a 32-item instrument designed to measure self-reported functional performance of patients with chronic obs…	[Wu, Zheng-Lai] Chinese Acad Med Sci, Dept Epidemiol, Sch Basic Med, Peking Union Med Coll, Beijing 100005, Peoples R China; [Wu, Zheng-Lai] Chinese Acad Med Sci, Inst Basic Med Sci, Beijing 100005, Peoples R China; [Guo, Ai-Min] Peking Union Med Coll, Sch Nursing, Beijing 100021, Peoples R China; [Han, Jiang-Na] Beijing Union Med Coll Hosp, Dept Pneumol, Beijing 100021, Peoples R China; [Leidy, …	Wu, ZL (reprint author), Chinese Acad Med Sci, Dept Epidemiol, Sch Basic Med, Peking Union Med Coll, 5 Dong Dan San Tiao, Beijing 100005, Peoples R China.	wuzl@public3.bta.net.cn						44	3	3	WILEY-BLACKWELL	MALDEN	COMMERCE PLACE, 350 MAIN ST, MALDEN 02148, MA USA	0962-1067			J CLIN NURS	J. Clin. Nurs.	JUN	2011	20	42320					1613
J	Liu, XH; Pan, B; Yang, YH; Wu, L; Yang, J; Yang, ZH; Song, YP				Liu, Xue-hong; Pan, Bo; Yang, Yan-hua; Wu, Li; Yang, Jing; Yang, Zhi-hua; Song, Yu-peng			Using a closed-tube irrigation technique to treat the infection of soft tissue expansion and fat injection	JOURNAL OF CLINICAL NURSING			English	Article						closed-tubed irrigation; fat injection; infection; nursing practice; plastic surgery; soft tissue expansion.			[Liu, Xue-hong; Yang, Yan-hua; Yang, Zhi-hua] Peking Union Med Coll, Chinese Acad Med Sci, Plast Surg Hosp, Clin Nurse, Beijing 100021, Peoples R China	Song, YP (reprint author), Peking Union Med Coll, Chinese Acad Med Sci, Plast Surg Hosp, Clin Nurse, Beijing 100021, Peoples R China.	sypriver@163.com						5	0	0	WILEY-BLACKWELL PUBLISHING, INC	MALDEN	COMMERCE PLACE, 350 MAIN ST, MALDEN 02148, MA USA	0962-1067			J CLIN NURS	J. Clin. Nurs.	JAN	2011	20	42006					292
J	Ren, ZH				Ren, Zhenghong			Utilisation of antenatal care in four counties in Ningxia, China	MIDWIFERY			English	Article						Antenatal care; Utilisation of antenatal care; China	RANDOMIZED CONTROLLED-TRIALS; MATERNAL MORTALITY; WOMEN; DETERMINANTS; SERVICES; PROGRAM; VISITS; NUMBER	Objectives: to analyse and evaluate the antenatal care services and its quality so as to improve the antenatal care, and make it more available and cost-effective. Design: retrospective survey. A multistage sampling technique was used to select townships and villages. Setting: the four rural counties of a project in Ningxia Hui Autonomous Region in northwest China, where more than one half of the…	Peking Univ, Hlth Sci Ctr, Sch Publ Hlth, Dept Child Adolescent & Womens Hlth, Beijing 100191, Peoples R China	Ren, ZH (reprint author), Peking Univ, Hlth Sci Ctr, Sch Publ Hlth, Dept Child Adolescent & Womens Hlth, Beijing 100191, Peoples R China.	rzhong65@126.com			UNICEF	We received support from the health institutions and health workers in the four counties, Ningxia, China for the field work reported in this research. Professor Wang Xiaoli provided useful comments and support to improve the draft of this article. Dr. Petra Lofstedt from Karolinska Institute, Sweden gave us a great help to improve our English in the article. Funding for this research was provided…		35	2	2	ELSEVIER SCI LTD	OXFORD	THE BOULEVARD, LANGFORD LANE, KIDLINGTON, OXFORD OX5 1GB, OXON, ENGLAND	0266-6138			MIDWIFERY	Midwifery	DEC	2011	27	6					E260
J	Xiang, YT; Wang, CY; Chiu, HFK; Weng, YZ; Bo, QJ; Chan, SSM; Lee, EHM; Ungvari, GS				Xiang, Yu-Tao; Wang, Chuan-Yue; Chiu, Helen F. K.; Weng, Yong-Zhen; Bo, Qi-Jing; Chan, Sandra S. M.; Lee, Edwin H. M.; Ungvari, Gabor S.			Socio-Demographic and Clinical Profiles of Paranoid and Nonparanoid Schizophrenia: A Prospective, Multicenter Study in China	PERSPECTIVES IN PSYCHIATRIC CARE			English	Article						Chinese; paranoid; schizophrenia; subtype	SUBTYPES; RISPERIDONE; ONSET; DIAGNOSIS; PROJECT; GENDER; AGE	PURPOSE: This study aimed to explore the socio-demographic and clinical characteristics of paranoid and nonparanoid subtypes of schizophrenia. DESIGN AND METHODS: In a multicenter, randomized, controlled, longitudinal study, 374 clinically stable schizophrenia patients were interviewed at entry with standardized assessment instruments and followed for 12-26 months. FINDINGS: In the multivariate a…	[Xiang, Yu-Tao; Wang, Chuan-Yue; Weng, Yong-Zhen; Bo, Qi-Jing] Capital Med Univ, Beijing Anding Hosp, Beijing, Peoples R China; [Xiang, Yu-Tao; Chiu, Helen F. K.; Chan, Sandra S. M.; Lee, Edwin H. M.] Chinese Univ Hong Kong, Dept Psychiat, Hong Kong, Hong Kong, Peoples R China; [Ungvari, Gabor S.] Univ Western Australia, Graylands Hosp, Sch Psychiat & Clin Neurosci, Perth, WA 6009, Australia	Wang, CY (reprint author), Capital Med Univ, Beijing Anding Hosp, Beijing, Peoples R China.	wang_cy@ccmu.edu.cn	王, 传跃/C-9369-2015	王, 传跃/0000-0001-6549-3713	10th National Five-Year Plan Foundation of the Ministry of Science and Technology, People's Republic of China [2004BA720A22]; Research Foundation of the Xian-Janssen Pharmaceutical Company [RIS-CN-MCCT-0201]; National Natural Science Foundation of China [30800367]; Beijing Municipal Science and Technology Commission [2008B59]	This study was supported by grants from the 10th National Five-Year Plan Foundation of the Ministry of Science and Technology Program, People's Republic of China (No. 2004BA720A22), the Research Foundation of the Xian-Janssen Pharmaceutical Company (No. RIS-CN-MCCT-0201), the National Natural Science Foundation of China (No. 30800367), and the Beijing Nova Program of the Beijing Municipal Science…		26	1	1	WILEY-BLACKWELL	MALDEN	COMMERCE PLACE, 350 MAIN ST, MALDEN 02148, MA USA	0031-5990			PERSPECT PSYCHIATR C	Perspect. Psychiatr. Care	JUL	2011	47	3					126
J	Wu, Y; Deng, Y; Zhang, Y				Wu, Ying; Deng, Ying; Zhang, Ying			Knowledge, Attitudes, and Behaviors of Nursing Professionals and Students in Beijing Toward Cardiovascular Disease Risk Reduction	RESEARCH IN NURSING & HEALTH			English	Article						nurse; knowledge attitude and behavior; cardiovascular diseases; risk factors reduction; lifestyle modification	INTERNAL-MEDICINE; BLOOD-PRESSURE; NURSES; PREVENTION; CHINA; INTERVENTION; CARE; PRACTITIONERS; CONFIDENCE; PHYSICIANS	The rising incidence of cardiovascular disease (CVD) in China intensifies the need for effective health education for CVD risk reduction. The purpose of this study was to develop a description of nurses' knowledge about, attitudes toward, practice behaviors, and personal lifestyle behaviors related to CVD risk reduction. We surveyed 273 staff nurses, 35 nursing faculty, and 139 nursing students i…	[Wu, Ying; Deng, Ying] Capital Med Univ, Sch Nursing, Beijing 100069, Peoples R China; [Zhang, Ying] Peking Univ, Neurosci Res Inst, Beijing 100871, Peoples R China	Wu, Y (reprint author), Capital Med Univ, Sch Nursing, 10 You An Men Wai Xi Tou Tiao, Beijing 100069, Peoples R China.				Ministry of Health of People's Republic of China; Bristol-Myers Squibb Foundation of the United States	Grant sponsor: Ministry of Health of People's Republic of China; Grant sponsor: Bristol-Myers Squibb Foundation of the United States.		40	1	2	WILEY-BLACKWELL	HOBOKEN	111 RIVER ST, HOBOKEN 07030-5774, NJ USA	0160-6891			RES NURS HEALTH	Res. Nurs. Health	JUN	2011	34	3					228
J	Dutta, A; Ray, MR				Dutta, Anindita; Ray, Manas Ranjan			Prevalence of hypertension and pre-hypertension in rural women: A report from the villages of West Bengal, a state in the eastern part of India	AUSTRALIAN JOURNAL OF RURAL HEALTH			English	Article						female; hypertensive; pre-hypertensive; tachycardia; village area	BLOOD-PRESSURE; CARDIOVASCULAR-DISEASE; HEART-RATE; RISK; POPULATIONS; ASSOCIATION; MORTALITY; ADULTS; SMOKE	Objective: To find out the prevalence of hypertension, pre-hypertension and tachycardia among the women in rural areas of West Bengal, identify co-factors associated with the prevalence and contribute to the body of evidence for future health programs to identify at-risk groups. Design: A population-based cross-sectional study was conducted. Setting: The study was conducted in remote villages. Pa…	[Dutta, Anindita] Peking Univ, Zhu Tong Grp, Coll Environm Sci & Engn, Beijing 100871, Peoples R China; [Dutta, Anindita; Ray, Manas Ranjan] Chittaranjan Natl Canc Inst, Dept Expt Hematol, Kolkata, India	Dutta, A (reprint author), Peking Univ, Zhu Tong Grp, Coll Environm Sci & Engn, Room 217, Beijing 100871, Peoples R China.	anidu14@gmail.com			Council of Scientific and Industrial Research, India	The study was funded by Council of Scientific and Industrial Research, India.		29	8	9	WILEY-BLACKWELL	HOBOKEN	111 RIVER ST, HOBOKEN 07030-5774, NJ USA	1038-5282	1440-1584		AUST J RURAL HEALTH	Aust. J. Rural Health	AUG	2012	20	4					219
J	Li, B; Wang, JR; Ma, YL				Li, Bing; Wang, Jian-Rong; Ma, Yan-Lan			Bowel Sounds and Monitoring Gastrointestinal Motility in Critically Ill Patients	CLINICAL NURSE SPECIALIST			English	Article						auscultation; critical illness; gastrointestinal motility; intensive care unit	ABDOMINAL AUSCULTATION; SYSTEM	Purpose: The aims of this study were to determine whether bowel sounds auscultation is necessary in critically ill patients and to forecast the prospect of bowel sounds as a monitoring measurement in the intensive care unit (ICU). Background: It has been suggested recently that bowel sounds are not an objective indicator of bowel motility and that auscultation should be abandoned. This has led to…	[Li, Bing] Postgrad Med Coll, Beijing, Peoples R China; [Wang, Jian-Rong; Ma, Yan-Lan] Chinese Peoples Liberat Army Gen Hosp, Beijing, Peoples R China	Wang, JR (reprint author), 28 Fuxing Rd, Beijing 100853, Peoples R China.	crystallibing1@126.com						31	1	1	LIPPINCOTT WILLIAMS & WILKINS	PHILADELPHIA	530 WALNUT ST, PHILADELPHIA, PA 19106-3621 USA	0887-6274			CLIN NURSE SPEC	Clin. Nurse Spec.	JAN-FEB	2012	26	1					29
J	Yu, MM; Chair, SY; Chan, CWH; Li, XM; Choi, KC				Yu, Mingming; Chair, Sek Ying; Chan, Carmen W. H.; Li, Xiaomei; Choi, Kai Chow			Perceived learning needs of patients with heart failure in China: A cross-sectional questionnaire survey	CONTEMPORARY NURSE			English	Article						health education; heart failure; learning needs; relationship; China	MANAGEMENT	Aim: To identify the learning needs of patients with heart failure (HF) in China and to examine the relationships between learning needs and patients' characteristics. Background: Little information on the learning needs of patients with HF in China is known. Besides, it is important to identify the potential characteristics that may influence patients' perceived learning needs. Methods: This cro…	[Yu, Mingming] Peking Union Med Coll, Sch Nursing, Beijing 100021, Peoples R China; [Chair, Sek Ying; Chan, Carmen W. H.; Choi, Kai Chow] Chinese Univ Hong Kong, Nethersole Sch Nursing, Shatin, Hong Kong, Peoples R China; [Li, Xiaomei] Xi An Jiao Tong Univ, Fac Nursing, Coll Med, Xian 710049, Peoples R China	Yu, MM (reprint author), Peking Union Med Coll, Sch Nursing, Beijing 100021, Peoples R China.		Chan, Carmen/A-4480-2015					32	3	3	ECONTENT MANAGEMENT	MALENY	PO BOX 1027, MALENY, QUEENSLAND 4552, AUSTRALIA	1037-6178			CONTEMP NURSE	Contemp. Nurse.	APR	2012	41	1					70
J	Li, XP; Luo, R; Jiang, RJ; Chen, RZ; Hua, W				Li, Xiaoping; Luo, Rong; Jiang, Rongjian; Chen, Ruizhen; Hua, Wei			Human leukocyte antigen-DQ beta 1 chain (DQB1) gene polymorphisms are associated with dilated cardiomyopathy: A systematic review and meta-analysis	HEART & LUNG			English	Review						HLA-DQB1; Dilated cardiomyopathy; Meta-analysis	HLA CLASS-II; HEART-FAILURE; INTERNATIONAL SOCIETY; HLA-DQB1 GENE; TASK-FORCE; SUSCEPTIBILITY; CLASSIFICATION; PATHOGENESIS; DEFINITION; PREVALENCE	BACKGROUND: Previous studies reported an association between the human leukocyte antigen (HLA)-DQ antigen beta 1 chain (DQB1) alleles and dilated cardiomyopathy (DCM). However, the results of those studies have been inconsistent. To clarify the association between HLA-DQB1 and DCM, we performed a systematic review and meta-analysis of case-control studies. METHODS: Searches were performed using t…	[Li, Xiaoping; Hua, Wei] Chinese Acad Med Sci, Dept Clin Electrophysiol, Fuwai Hosp, Beijing 100037, Peoples R China; [Li, Xiaoping; Hua, Wei] Chinese Acad Med Sci, Cardiovasc Inst, Beijing 100037, Peoples R China; [Li, Xiaoping; Hua, Wei] Peking Union Med Coll, Beijing 100037, Peoples R China; [Luo, Rong] Guangxi Med Univ, Med Sci Res Ctr, Nanning, Peoples R China; [Jiang, Rongjian] Sichuan Acad…	Hua, W (reprint author), Chinese Acad Med Sci, Dept Clin Electrophysiol, Fuwai Hosp, Beijing 100037, Peoples R China.	drhua@yahoo.cn			National Natural Science Foundation of China [81000104]	This project was supported by grant 81000104 from the National Natural Science Foundation of China.		37	2	2	MOSBY-ELSEVIER	NEW YORK	360 PARK AVENUE SOUTH, NEW YORK, NY 10010-1710 USA	0147-9563			HEART LUNG	Heart Lung	JUL-AUG	2012	41	4					360
J	Yang, SW; Thou, YJ; Guo, ZF; Hu, DY				Yang, Shi-Wei; Thou, Yu-Jie; Guo, Zhen-Feng; Hu, Da-Yi			The natural course of traumatic myocardial infarction in a young patient with angiographically normal coronary arteries	HEART & LUNG			English	Article							BLUNT CHEST TRAUMA; HEART-ASSOCIATION ELECTROCARDIOGRAPHY; FOR-COMPUTERIZED-ELECTROCARDIOLOGY; OF-CARDIOLOGY FOUNDATION; AHA/ACCF/HRS RECOMMENDATIONS; ARRHYTHMIAS COMMITTEE; SCIENTIFIC STATEMENT; CLINICAL CARDIOLOGY; DISSECTION; REVASCULARIZATION	A 23-year-old man with no history of heart disease was admitted to Beijing Anzhen Hospital Affiliated to Capital Medical University for an abnormal electrocardiogram of ST-T changes mimicking myocardial infarction. Catheterization revealed normal coronary and peripheral arteries. The echocardiogram and delayed enhancement cardiovascular magnetic resonance imaging indicated a markedly reduced left…	[Yang, Shi-Wei; Thou, Yu-Jie] Capital Med Univ, Dept Cardiol, Beijing Anzhen Hosp Affiliated, Beijing 100029, Peoples R China; [Guo, Zhen-Feng] Nanjing Med Univ, Dept Cardiol, Benq Med Ctr Affiliated, Nanjing, Jiangsu, Peoples R China; [Hu, Da-Yi] Peking Univ, Dept Cardiol, Peoples Hosp Affiliated, Beijing 100871, Peoples R China	Thou, YJ (reprint author), Capital Med Univ, Dept Cardiol, Beijing Anzhen Hosp Affiliated, Beijing 100029, Peoples R China.	jackydang@163.com			Beijing Municipal Education Commission [KZ201110025031]	The case report was supported by a grant from the Beijing Municipal Education Commission (No. KZ201110025031).		33	1	1	MOSBY-ELSEVIER	NEW YORK	360 PARK AVENUE SOUTH, NEW YORK, NY 10010-1710 USA	0147-9563			HEART LUNG	Heart Lung	MAY-JUN	2012	41	3					294
J	Zhou, L; Tao, ZH; Wu, Y; Wang, NQ; Chen, TH; Song, Y; Deng, Y; Zhang, YR				Zhou, Lin; Tao, Zhenhui; Wu, Ying; Wang, Naqing; Chen, Tinghui; Song, Yang; Deng, Ying; Zhang, Yarong			Individual and institutional factors affecting cardiac monitoring in coronary care units: A national survey of Chinese nurses	INTERNATIONAL JOURNAL OF NURSING STUDIES			English	Article						ST-segment monitoring; Electrocardiogram; Cardiac monitoring; Myocardial ischemia; Coronary care; China	MERLIN-TIMI 36; MYOCARDIAL-INFARCTION; ELECTROCARDIOGRAPHY; ISCHEMIA; STANDARD; ECG	Background: As cardiovascular diseases have become the leading cause of death in many countries including China, nurses are increasingly required to be abreast of technological advances and the skills necessary to manage this increasing health care problem. Chinese nurses are under pressure to provide skilled electrocardiography monitoring, and be sufficiently skilled to detect myocardial ischemi…	[Zhou, Lin; Wu, Ying; Wang, Naqing; Chen, Tinghui; Song, Yang; Deng, Ying; Zhang, Yarong] Capital Med Univ, Sch Nursing, Beijing 100069, Peoples R China; [Tao, Zhenhui] Peking Univ, Capital Med Univ, Sch Nursing, Hemodialysis Unit,Hosp 1, Beijing 100871, Peoples R China	Wu, Y (reprint author), Capital Med Univ, Sch Nursing, 10 You An Men Wai Xi Tou Tiao, Beijing 100069, Peoples R China.	helenywu@vip.163.com	Long, Lesley/D-5106-2012		Capital Medical University; Joint Research Foundation of Basic and Clinical Medical Science Research of Capital Medical University	This survey was supported by the Joint Research Foundation of Basic and Clinical Medical Science Research of Capital Medical University. The first two authors Lin Zhou and Zhenhui Tao contributed equally to the conduction of the survey and the preparation of this manuscript. We would like to thank all the participants of this survey to provide relative information so that conclusions of Chinese n…		26	1	1	PERGAMON-ELSEVIER SCIENCE LTD	OXFORD	THE BOULEVARD, LANGFORD LANE, KIDLINGTON, OXFORD OX5 1GB, ENGLAND	0020-7489			INT J NURS STUD	Int. J. Nurs. Stud.	MAY	2012	49	5					570
J	Quan, L; Dong, J; Li, YJ; Zuo, L				Quan, Lei; Dong, Jie; Li, Yanjun; Zuo, Li			The effectiveness of intensive nursing care on seasonal variation of blood pressure in patients on peritoneal dialysis	JOURNAL OF ADVANCED NURSING			English	Article						blood pressure; nurse; seasonal variation	CHRONIC KIDNEY-DISEASE; STAGE RENAL-DISEASE; MYOCARDIAL-INFARCTION; HEMODIALYSIS-PATIENTS; HYPERTENSION; HOME; OVERHYDRATION; MANAGEMENT; STROKE; TRIAL	quan l., dong j., li y. & zuo l. (2012) The effectiveness of intensive nursing care on seasonal variation of blood pressure in patients on peritoneal dialysis. Journal of Advanced Nursing68(6), 1267-1275. Abstract Aim. This article is a report of a study to reduce the seasonal variation of blood pressure in patients on peritoneal dialysis through an intensive programme of nursing care. Background…	[Quan, Lei; Dong, Jie; Li, Yanjun; Zuo, Li] Peking Univ, Dept Med, Peking Univ Hosp 1, Inst Nephrol,Renal Div, Beijing 100871, Peoples R China; [Quan, Lei; Dong, Jie; Li, Yanjun; Zuo, Li] Minist Hlth China, Key Lab Renal Dis, Beijing, Peoples R China	Zuo, L (reprint author), Peking Univ, Dept Med, Peking Univ Hosp 1, Inst Nephrol,Renal Div, Beijing 100871, Peoples R China.	zuolimd@gmail.com						32	2	3	WILEY-BLACKWELL	MALDEN	COMMERCE PLACE, 350 MAIN ST, MALDEN 02148, MA USA	0309-2402			J ADV NURS	J. Adv. Nurs.	JUN	2012	68	6					1267
J	Yao, X; Li, Z; Arthur, D; Hu, L; Cheng, G				Yao, X.; Li, Z.; Arthur, D.; Hu, L.; Cheng, G.			The application of a violence risk assessment tool among Chinese psychiatric service users: a preliminary study	JOURNAL OF PSYCHIATRIC AND MENTAL HEALTH NURSING			English	Article						aggression; prediction; psychiatry; risk assessment; violence; Violence-Risk-10	PSYCHOPATHY CHECKLIST; AGGRESSION; PREDICTION; INPATIENTS; ACTUARIAL; ACCURACY; BEHAVIOR; UTILITY; NURSES; HCR-20	Accessible summary <bold></bold> The lack of standardized violence risk assessment instruments has disadvantaged Chinese nurses in clinical practice. <bold></bold> The Violence Risk Screening-10 (V-RISK-10), a 10-item scale with strongly sound face and content validity and evidence of reliability, is worth to be tested in Chinese culture. <bold></bold> This study, conducted in eight closed wards …	[Yao, X.; Li, Z.] Peking Union Med Coll, Sch Nursing, Beijing 100144, Peoples R China; [Hu, L.] Capital Med Univ, Dept Nursing, Beijing, Peoples R China; [Cheng, G.] Capital Med Univ, Dept Nursing, Beijing An Ding Hosp, Beijing, Peoples R China; [Arthur, D.] Angeles Univ Fdn, Ctr Res & Dev, Angeles, Philippines	Li, Z (reprint author), Peking Union Med Coll, Sch Nursing, 33 Badachu Rd, Beijing 100144, Peoples R China.	zhengli@hotmail.com						36	3	4	WILEY-BLACKWELL	MALDEN	COMMERCE PLACE, 350 MAIN ST, MALDEN 02148, MA USA	1351-0126			J PSYCHIATR MENT HLT	J. Psychiatr. Ment. Health Nurs.	JUN	2012	19	5					438
J	Lu, H; Zhu, X; Hou, R; Wang, DH; Zhang, HJ; While, A				Lu, Hong; Zhu, Xiu; Hou, Rui; Wang, De-hui; Zhang, Hai-juan; While, Alison			Chinese family adaptation during the postpartum period and its influencing factors: A questionnaire survey	MIDWIFERY			English	Article						Family adaptation; Family function; Family resources; Parenthood	SOCIAL SUPPORT; HEALTH-STATUS; EXPERIENCES; DEPRESSION; PARENTHOOD; TRANSITION; WOMEN; FATHERHOOD	Aim: this study aimed to explore new parents' views and experiences during their transition to parenthood. Background: in China the one-child birth policy may bring more stress and challenges for the new parents due to the lack of experience and greater expectations of their new role. China is also at a stage of rapid economic and social development which creates new conditions for parenthood. Me…	[Lu, Hong; Zhu, Xiu; Hou, Rui; Wang, De-hui; Zhang, Hai-juan] Peking Univ, Sch Nursing, Beijing 100191, Peoples R China; [While, Alison] Kings Coll London, Florence Nightingale Sch Nursing & Midwifery, London SE1 8WA, England	Lu, H (reprint author), Peking Univ, Sch Nursing, 38 Xueyuan Rd, Beijing 100191, Peoples R China.	luhong@bjmu.edu.cn						42	4	4	ELSEVIER SCI LTD	OXFORD	THE BOULEVARD, LANGFORD LANE, KIDLINGTON, OXFORD OX5 1GB, OXON, ENGLAND	0266-6138			MIDWIFERY	Midwifery	APR	2012	28	2					222
J	Zou, HO; Li, Z; Arthur, D				Zou, Haiou; Li, Zheng; Arthur, David			Graduate nursing education in China	NURSING OUTLOOK			English	Article						Graduate; Nursing education; China		Despite the relatively long history of nursing education, the development of graduate nursing education in the People's Republic of China is slow compared to western countries. Yet, rapid social changes call for higher quality nursing care. Consequently, the Chinese government has acknowledged the need to upgrade nursing education in China. The first master of nursing program was established in 1…	[Zou, Haiou; Li, Zheng] Peking Union Med Coll, Sch Nursing, Beijing 100730, Peoples R China; [Arthur, David] Angeles Univ Fdn, Angeles City, Philippines	Li, Z (reprint author), Peking Union Med Coll, Sch Nursing, 9 Dong Dan San Tiao, Beijing 100730, Peoples R China.	zhengli@hotmail.com						0	0	0	ELSEVIER SCIENCE INC	NEW YORK	360 PARK AVE SOUTH, NEW YORK, NY 10010-1710 USA	0029-6554			NURS OUTLOOK	Nurs. Outlook	MAY-JUN	2012	60	3					116
J	Liu, Y; Insel, KC; Reed, PG; Crist, JD				Liu, Yu; Insel, Kathleen C.; Reed, Pamela G.; Crist, Janice D.			Family Caregiving of Older Chinese People With Dementia Testing a Model	NURSING RESEARCH			English	Article						caregiver; caregiving process; dementia	PERCEIVED SOCIAL SUPPORT; ALZHEIMERS-DISEASE; MULTIDIMENSIONAL SCALE; CONCEPTUAL-FRAMEWORK; BEHAVIOR PROBLEMS; POSITIVE ASPECTS; HEALTH SURVEY; BURDEN; APPRAISAL; IMPACT	Background: The process of taking care of older people with dementia at home is complex and influenced by cultural factors, necessitating a better understanding of the interrelationships of factors within the context of culture. Objectives: The aim of this study was to test the proposed Dementia Caregiving Model, specifying how caregiving appraisal, coping, perceived social support, and familism …	[Liu, Yu] Peking Univ, Sch Nursing, Beijing 100191, Peoples R China; [Insel, Kathleen C.; Reed, Pamela G.; Crist, Janice D.] Univ Arizona, Coll Nursing, Tucson, AZ 85721 USA	Liu, Y (reprint author), Peking Univ, Sch Nursing, 38 Xueyuan Rd, Beijing 100191, Peoples R China.	yliu_2010@bjmu.edu.cn			University of Arizona College of Nursing; American Association of University Women; Sigma Theta Tau International Honor Society of Nursing Beta Mu Chapter	We also thank Dr. Putt from the University of Arizona College of Nursing and American Association of University Women for generous financial support for a PhD study and this research.This work was supported by the Doctoral Student Research Grant from the Sigma Theta Tau International Honor Society of Nursing Beta Mu Chapter.		62	8	8	LIPPINCOTT WILLIAMS & WILKINS	PHILADELPHIA	530 WALNUT ST, PHILADELPHIA, PA 19106-3621 USA	0029-6562			NURS RES	Nurs. Res.	JAN-FEB	2012	61	1					39
J	Zou, HO; Li, Z; Nolan, M; Wang, HX; Hu, LL				Zou, Haiou; Li, Zheng; Nolan, Marie; Wang, Hongxing; Hu, Lili			Self-Management Among Chinese People With Schizophrenia and Their Caregivers: A Qualitative Study	ARCHIVES OF PSYCHIATRIC NURSING			English	Article							MENTAL-HEALTH; AUDITORY HALLUCINATIONS; MEDICATION COMPLIANCE; SUPPORTED EMPLOYMENT; HELP-SEEKING; OF-LIFE; PREVALENCE; INTERVENTION; COMMUNITY; ILLNESS	This study explores the practice of self-management in Chinese people with schizophrenia and their caregivers. Twenty-one patients and 14 caregivers were interviewed. Four themes were identified, reflecting the practice of self-management from both the patients' and caregivers' perspective: managing medication, monitoring and dealing with symptoms, maintaining social relations, and seeking health…	[Li, Zheng] Peking Union Med Coll, Sch Nursing, Beijing 100730, Peoples R China; Johns Hopkins Univ, Sch Nursing, Baltimore, MD USA; Capital Med Univ, Beijing An Ding Hosp, Beijing, Peoples R China	Li, Z (reprint author), Peking Union Med Coll, Sch Nursing, Dong Dan San Tiao 9, Beijing 100730, Peoples R China.	zhengli@hotmail.com			China Medical Board [04-797]	This research was funded by China Medical Board (grant number 04-797).		53	0	5	W B SAUNDERS CO-ELSEVIER INC	PHILADELPHIA	1600 JOHN F KENNEDY BOULEVARD, STE 1800, PHILADELPHIA, PA 19103-2899 USA	0883-9417			ARCH PSYCHIAT NURS	Arch. Psychiatr. Nurs.	FEB	2013	27	1					42
J	Zhao, YY; Ding, Y; Lu, YH; Zhang, J; Gu, J; Li, M				Zhao, YiYuan; Ding, Yue; Lu, YuHan; Zhang, Jie; Gu, Jin; Li, Ming			Incidence and Self-Management of Hand-Foot Syndrome in Patients With Colorectal Cancer	CLINICAL JOURNAL OF ONCOLOGY NURSING			English	Article							CHEMOTHERAPY; CAPECITABINE	The purpose of this article is to describe the incidence of hand-foot syndrome (HFS) and self-management of patients with it, including their self-recognition, supportive care, and outcome at home. Study participants were patients with colorectal cancer (CRC) who received adjuvant chemotherapy after surgery. About 67% of participants had HFS, most at grade 1. The median chemotherapy cycle where H…	[Zhao, YiYuan; Ding, Yue; Lu, YuHan; Zhang, Jie; Gu, Jin; Li, Ming] Peking Univ Hosp & Inst, Colorectal Dept, Key Lab Carcinogenesis & Translat Res, Minist Educ, Beijing, Peoples R China	Zhao, YY (reprint author), Peking Univ Hosp & Inst, Colorectal Dept, Key Lab Carcinogenesis & Translat Res, Minist Educ, Beijing, Peoples R China.	ming_li_pku@yahoo.com						13	1	1	ONCOLOGY NURSING SOC	PITTSBURGH	125 ENTERPRISE DR, PITTSBURGH, PA 15275 USA	1092-1095	1538-067X		CLIN J ONCOL NURS	Clin. J. Oncol. Nurs.	AUG	2013	17	4					434
J	Wang, J; Ma, YM; Fang, QH				Wang, Jing; Ma, Yingmin; Fang, Qiuhong			Extubation With or Without Spontaneous Breathing Trial	CRITICAL CARE NURSE			English	Article							PRESSURE SUPPORT VENTILATION; MECHANICAL VENTILATION; T-TUBE; PARAMETERS; DURATION; TIME	PURPOSE-To evaluate whether spontaneous breathing trials (SBTs) are necessary when extubating critical care patients. METHODS-A prospective, randomized, double-blind study was performed in adult patients supported by mechanical ventilation for at least 48 hours in the general intensive care unit of a teaching hospital. Patients ready for weaning were randomly assigned to either the SBT group (ext…	[Wang, Jing] Peoples Liberat Army Gen Hosp, Dept Resp Med, Beijing, Peoples R China; [Ma, Yingmin; Fang, Qiuhong] Capital Med Univ, Beijing Shijitan Hosp, Dept Resp Med, Beijing 100069, Peoples R China	Ma, YM (reprint author), Capital Med Univ, Beijing Shijitan Hosp, Dept Resp Med, Beijing 100069, Peoples R China.	wjcn268@126.com						23	0	0	AMER ASSOC CRITICAL CARE NURSES	ALISO VIEJO	101 COLUMBIA, ALISO VIEJO, CA 92656 USA	0279-5442	1940-8250		CRIT CARE NURSE	Crit. Care Nurse	DEC	2013	33	6					50
J	Zhu, H; Zhou, Z; Xue, Q; Zhang, X; He, J; Wang, L				Zhu, H.; Zhou, Z.; Xue, Q.; Zhang, X.; He, J.; Wang, L.			Treatment modality selection and prognosis of early stage small cell lung cancer: retrospective analysis from a single cancer institute	EUROPEAN JOURNAL OF CANCER CARE			English	Article						small cell lung cancer; chemoradiotherapy; surgery; overall survival	THORACIC RADIOTHERAPY; RADIATION-THERAPY; RANDOMIZED TRIAL; CHEMOTHERAPY; SURGERY; CARCINOMA; CISPLATIN; ETOPOSIDE; SURVIVAL; METAANALYSIS	We evaluated the role of surgery followed by either chemotherapy (ChT) alone or chemotherapy and thoracic radiotherapy (ChT/TRT) versus sequential ChT/TRT in patients with clinical stage I or stage II small cell lung cancer (SCLC). Ninety-six patients received surgery (complete resection) followed by either ChT alone or ChT/TRT (Group I), while 49 patients were treated exclusively with sequential…	[Zhu, H.; Zhou, Z.; Wang, L.] Chinese Acad Med Sci, Canc Inst & Hosp, Dept Radiat Oncol, Beijing 100021, Peoples R China; [Zhu, H.; Zhou, Z.; Xue, Q.; Zhang, X.; He, J.; Wang, L.] Peking Union Med Coll, Beijing 100021, Peoples R China; [Xue, Q.; He, J.] Chinese Acad Med Sci, Canc Inst & Hosp, Dept Thorac Surg, Beijing 100021, Peoples R China; [Zhang, X.] Chinese Acad Med Sci, Canc Inst & Hosp, De…	Wang, L (reprint author), Chinese Acad Med Sci, Canc Inst & Hosp, Dept Radiat Oncol, Beijing 100021, Peoples R China.	wlhwq@yahoo.com						25	1	1	WILEY-BLACKWELL	HOBOKEN	111 RIVER ST, HOBOKEN 07030-5774, NJ USA	0961-5423	1365-2354		EUR J CANCER CARE	Eur. J. Cancer Care	NOV	2013	22	6					789
J	Zou, HO; Li, Z; Nolan, MT; Arthur, D; Wang, HX; Hu, LL				Zou, Haiou; Li, Zheng; Nolan, Marie T.; Arthur, David; Wang, Hongxing; Hu, Lili			Self-management education interventions for persons with schizophrenia: A meta-analysis	INTERNATIONAL JOURNAL OF MENTAL HEALTH NURSING			English	Article						meta-analysis; schizophrenia; self-management education interventions	RANDOMIZED CONTROLLED-TRIAL; SKILLS TRAINING APPROACH; RELAPSE PREVENTION; MENTAL-ILLNESS; PSYCHOEDUCATION; SYMPTOMS; PROGRAM; DISEASE; ADHERENCE; PATIENT	Although self-management education programs for persons with schizophrenia are being developed and advocated, uncertainty about their overall effectiveness remains. The purpose of this meta-analysis was to examine outcomes of self-management education interventions in persons with schizophrenia. Six electronic databases were searched. Manual searches were conducted of the reference lists of the i…	[Zou, Haiou; Li, Zheng] Peking Union Med Coll, Sch Nursing, Beijing 100730, Peoples R China; [Wang, Hongxing; Hu, Lili] Capital Med Univ, Beijing An Ding Hosp, Beijing, Peoples R China; [Nolan, Marie T.] Johns Hopkins Univ, Sch Nursing, Baltimore, MD USA; [Arthur, David] Angeles Univ Fdn, Angeles City, Philippines	Li, Z (reprint author), Peking Union Med Coll, Sch Nursing, Dong Dan San Tiao 9, Beijing 100730, Peoples R China.	zhengli@hotmail.com			China Medical Board [04-797]	This research was funded by the China Medical Board (grant no. 04-797).		33	2	3	WILEY-BLACKWELL	HOBOKEN	111 RIVER ST, HOBOKEN 07030-5774, NJ USA	1445-8330	1447-0349		INT J MENT HEALTH NU	Int. J. Ment. Health Nurs.	JUN	2013	22	3					256
J	Wu, LP; He, Z; Zhao, H; Ma, D; Zhang, SJ; Deng, HY; Liang, T				Wu, Liping; He, Zhong; Zhao, Hong; Ma, Di; Zhang, Sijia; Deng, Hanyu; Liang, Tao			Chinese version of Daily Record of Severity of Problems: reliability and validity	JOURNAL OF ADVANCED NURSING			English	Article						Chinese version; Daily Record of Severity of Problems; nursing; premenstrual dysphoric disorder; premenstrual syndrome; reliability; validity	PREMENSTRUAL DYSPHORIC DISORDER; RATING DEPRESSION SCALE; IMPACT; PREVALENCE; SYMPTOMS; IDENTIFICATION; PRODUCTIVITY; DROSPIRENONE; MULTICENTER; IMPAIRMENT	Aim To report a study of the psychometric properties of the Chinese version of the Daily Record of Severity of Problems form. Background In China, the prevalence of premenstrual syndrome is not confirmed due to lack of prospective daily tools. Daily Record of Severity of Problems was a validated daily symptom chart widely used for the diagnosis of premenstrual syndrome. There is no such an instru…	[Wu, Liping; He, Zhong; Zhao, Hong; Ma, Di; Zhang, Sijia; Deng, Hanyu; Liang, Tao] Chinese Acad Med Sci, Sch Nursing, Peking Union Med Coll, Beijing, Peoples R China	He, Z (reprint author), Chinese Acad Med Sci, Sch Nursing, Peking Union Med Coll, Beijing, Peoples R China.	hezhong08@126.com			School of Nursing, Peking Union Medical College	This study was supported by School of Nursing, Peking Union Medical College.		39	0	0	WILEY-BLACKWELL	HOBOKEN	111 RIVER ST, HOBOKEN 07030-5774, NJ USA	0309-2402			J ADV NURS	J. Adv. Nurs.	FEB	2013	69	2					449
J	Liu, Y; Maier, M; Hao, YF; Chen, Y; Qin, YL; Huo, R				Liu, Yu; Maier, Manfred; Hao, Yufang; Chen, Yan; Qin, Yuelan; Huo, Ran			Factors related to quality of life for patients with type 2 diabetes with or without depressive symptoms - results from a community-based study in China	JOURNAL OF CLINICAL NURSING			English	Article						China; depression; diabetes mellitus; quality of life; type 2	MORTALITY	Aims and objectives To explore the factors related to quality of life for patients with type 2 diabetes with or without depressive symptoms in China. Background In patients with type 2 diabetes with or without depressive symptoms, different factors such as gender, social context or regional setting may affect their quality of life. Design This was a cross-sectional study. Methods Of 791 registere…	[Liu, Yu; Hao, Yufang; Chen, Yan] Beijing Univ Chinese Med, Sch Nursing, Beijing, Peoples R China; [Maier, Manfred] Med Univ Vienna, Dept Gen Practice & Family Med, Ctr Publ Hlth, Vienna, Austria; [Qin, Yuelan] Peoples Hosp Hunan Prov, Presidents Off, Changsha, Hunan, Peoples R China; [Huo, Ran] Beijing Chaoyang Hosp, Dept Educ, Beijing, Peoples R China	Liu, Y (reprint author), 6 Wangjingzhonghuann Anlu, Beijing 100102, Peoples R China.	liuyu222@hotmail.com			Hunan Health Department, Changsha, Hunan Province, China [B2009072]	This research project was supported by grant B2009072 from Hunan Health Department, Changsha, Hunan Province, China.		21	5	5	WILEY-BLACKWELL	HOBOKEN	111 RIVER ST, HOBOKEN 07030-5774, NJ USA	0962-1067			J CLIN NURS	J. Clin. Nurs.	JAN	2013	22	42006					80
J	Liu, Y; Maier, M; Wu, JH; Li, W; Chen, Y; Qin, YL; Hao, YF; Jin, RC				Liu, Yu; Maier, Manfred; Wu, Jihong; Li, Wei; Chen, Yan; Qin, Yuelan; Hao, Yufang; Jin, Rongchen			A Descriptive and Comparative Study From China On Patients With Type-2 Diabetes With and Without Depressive Symptoms	JOURNAL OF COMMUNITY HEALTH NURSING			English	Article							QUALITY-OF-LIFE; MAJOR DEPRESSION; SOCIAL SUPPORT; PREDICTORS; ADULTS	The aim of this study was to assess the prevalence of depressive symptoms for patients with type-2 diabetes at the population level in China and explore differences in demographic, socioeconomic, and disease-specific parameters between diabetic patients with and without depression. Self-rating depression scale was used to screen for depressive symptoms in 667 patients with type-2 diabetes from 4 …	[Liu, Yu] Beijing Univ Chinese Med, Sch Nursing, Beijing, Peoples R China; [Maier, Manfred] Med Univ Vienna, Ctr Publ Hlth, Vienna, Austria; [Wu, Jihong; Li, Wei; Chen, Yan; Hao, Yufang] Beijing Univ Chinese Med, Beijing, Peoples R China; [Qin, Yuelan] Peoples Hosp Hunan Prov, Changsha, Hunan, Peoples R China; [Jin, Rongchen] Hunan Univ Chinese Med, Changsha, Hunan, Peoples R China	Liu, Y (reprint author), 6 Wangjingzhonghuannanlu, Beijing 100102, Peoples R China.	liuyu222@hotmail.com			Hunan Health Department, China [B2009072]	This research project was supported by grant B2009072 from Hunan Health Department, China. None of the authors have to declare a conflict of interest.		24	1	1	ROUTLEDGE JOURNALS, TAYLOR & FRANCIS LTD	ABINGDON	4 PARK SQUARE, MILTON PARK, ABINGDON OX14 4RN, OXFORDSHIRE, ENGLAND	0737-0016			J COMMUN HEALTH NURS	J. Community Health Nurs.	2015-04-01	2013	30	2					106
J	Yang, FY; Zhao, RR; Liu, YS; Wu, Y; Jin, NN; Li, RY; Shi, SP; Shao, YY; Guo, M; Arthur, D; Elliott, M				Yang, Fang Yu; Zhao, Rong Rong; Liu, Yi Si; Wu, Ying; Jin, Ning Ning; Li, Rui Ying; Shi, Shu Ping; Shao, Yue Ying; Guo, Ming; Arthur, David; Elliott, Malcolm			A core competency model for Chinese baccalaureate nursing graduates: A descriptive correlational study in Beijing	NURSE EDUCATION TODAY			English	Article						Nursing education; Clinical competency; Evaluation of baccalaureate nursing graduates; Basic nursing education	CURRICULUM; STANDARDS; NURSES; DELPHI	Background: A review of the literature showed that the core competencies needed by newly graduated Chinese nurses were not as of yet undocumented. Objective: To develop a psychometrically sound instrument for identifying and measuring the core competendes needed by Chinese nursing baccalaureate graduates. Design: Descriptive correlational and multicentre study. Setting: Seven major tertiary teach…	[Yang, Fang Yu; Zhao, Rong Rong; Liu, Yi Si; Wu, Ying; Jin, Ning Ning; Li, Rui Ying; Guo, Ming] Capital Med Univ, Sch Nursing, Beijing 100069, Peoples R China; [Zhao, Rong Rong] Third Mil Med Univ, Chongqing, Peoples R China; [Shi, Shu Ping; Shao, Yue Ying] Capital Med Univ, Xuanwu Hosp, Beijing 100054, Peoples R China; [Arthur, David] Angeles Univ Fdn, Angeles City, Pampanga, Philippines; [Ellio…	Wu, Y (reprint author), Capital Med Univ, Sch Nursing, 10 You An Men Wai Xi Tou Tiao, Beijing 100069, Peoples R China.	yfykk@163.com; zhaorongr@yahoo.cn; asceticsisi@yahoo.com.cn; helenywu@vip.163.com; ningning_jin@163.com; liruiying1357@163.com; ssp8@sina.com; shaoyueying@sohu.com; guoming0607@yahoo.com.cn; davidgordonarthur@gmail.com; grandmal70@hotmail.com			President's Research Foundation for Educational Reform of Capital Medical University	This study was supported by the President's Research Foundation for Educational Reform of Capital Medical University. The first three authors, Yang, Fang Yu; Zhao, Rong Rong; Liu, Yi Si, contributed equally to the design and conduction of this study and preparation of the manuscript. All authors declare no conflicts of interest. We would like to thank all the participants of this study for provid…		35	0	3	CHURCHILL LIVINGSTONE	EDINBURGH	JOURNAL PRODUCTION DEPT, ROBERT STEVENSON HOUSE, 1-3 BAXTERS PLACE, LEITH WALK, EDINBURGH EH1 3AF, MIDLOTHIAN, SCOTLAND	0260-6917	1532-2793		NURS EDUC TODAY	Nurse Educ. Today	DEC	2013	33	12					1465
J	Liu, SH; Wang, L; Cao, CQ; Zhang, JX				Liu, Songhuai; Wang, Li; Cao, Chengqi; Zhang, Jianxin			The Factor Structure of Posttraumatic Stress Disorder Symptoms in Patients With Traumatic Spinal Cord Injuries	ARCHIVES OF PSYCHIATRIC NURSING			English	Article							CONFIRMATORY FACTOR-ANALYSIS; DYSPHORIC AROUSAL MODEL; UNIQUE PTSD CONSTRUCT; EARTHQUAKE VICTIMS; DIAGNOSTIC UTILITY; 5-FACTOR MODEL; FIT INDEXES; CHECKLIST; DIMENSIONALITY; VETERANS	The current study investigated the factor structure of posttraumatic stress disorder (PTSD) symptoms in a sample of 256 patients with traumatic spinal cord injuries (SCI) in China. The confirmatory factor analysis results showed that a five-factor model composed of intrusion, avoidance, emotional numbing, dysphoric arousal, and anxious arousal fits the data significantly better than the tripartit…	[Liu, Songhuai] Capital Med Univ, Fac Rehabil Med, Beijing, Peoples R China; [Liu, Songhuai] Beijing Boai Hosp, China Rehabil Res Ctr, Dept Psychol, Beijing, Peoples R China; [Liu, Songhuai] Capital Med Univ, Dept Clin Psychol, Beijing, Peoples R China; [Wang, Li; Cao, Chengqi; Zhang, Jianxin] Chinese Acad Sci, Inst Psychol, Key Lab Mental Hlth, Beijing 100101, Peoples R China; [Cao, Chengqi] Uni…	Wang, L (reprint author), Chinese Acad Sci, Inst Psychol, 16 Lincui Rd, Beijing 100101, Peoples R China.	liusonghuai2006@126.com; wangli1@psych.ac.cn; caocq@psych.ac.cn; zhangjx@psych.ac2cn			National Key Technology Research and Development Program of China [2013BAI08B02]; Key Research Program of the Chinese Academy of Sciences [KJZD-EW-L04]; National Natural Science Foundation of China [31271099]; Outstanding Young Investigator Foundation of the Institute of Psychology, Chinese Academy of Sciences; Key Laboratory of Mental Health, Institute of Psychology, Chinese Academy of Sciences	This study was supported partially by the National Key Technology Research and Development Program of China (no. 2013BAI08B02), the Key Research Program of the Chinese Academy of Sciences (no. KJZD-EW-L04), the National Natural Science Foundation of China (no. 31271099), the Outstanding Young Investigator Foundation of the Institute of Psychology, Chinese Academy of Sciences, and the Key Laborato…		45	1	1	W B SAUNDERS CO-ELSEVIER INC	PHILADELPHIA	1600 JOHN F KENNEDY BOULEVARD, STE 1800, PHILADELPHIA, PA 19103-2899 USA	0883-9417	1532-8228		ARCH PSYCHIAT NURS	Arch. Psychiatr. Nurs.	OCT	2014	28	5					301
J	Huang, BY; Zhou, ZJ; Xu, H; Wang, HY; Liu, BY; Cui, Y; Yang, W; Li, XM; Chen, LM				Huang, Baoyan; Zhou, Zijuan; Xu, Hong; Wang, Haiyun; Liu, Bingyan; Cui, Ying; Yang, Wei; Li, Xuemei; Chen, Limeng			Diminished Appetite Predicts Mortality of Chinese Peritoneal Dialysis Patients	BIOLOGICAL RESEARCH FOR NURSING			English	Article						peritoneal dialysis; appetite; malnutrition; inflammation; mortality	CHRONIC KIDNEY-DISEASE; HEMODIALYSIS-PATIENTS; NUTRITIONAL-STATUS; INFLAMMATION; FAILURE; PROTEIN; HEMO; HOSPITALIZATION	Background: Many maintenance dialysis patients experience a common cluster of symptoms, including diminished appetite (anorexia). This symptom has been associated with reduced quality of life and increased mortality in this population. Aim: The aim of this study was to determine whether diminished appetite is a significant predictor of negative clinical outcomes in patients on peritoneal dialysis…	[Huang, Baoyan; Zhou, Zijuan; Xu, Hong; Wang, Haiyun; Liu, Bingyan; Cui, Ying; Yang, Wei; Li, Xuemei; Chen, Limeng] Chinese Acad Med Sci, Dept Nephrol, Beijing 100730, Peoples R China; [Huang, Baoyan; Zhou, Zijuan; Xu, Hong; Wang, Haiyun; Liu, Bingyan; Cui, Ying; Yang, Wei; Li, Xuemei; Chen, Limeng] Beijing Union Med Coll Hosp, Beijing 100730, Peoples R China; [Huang, Baoyan] Chinese Acad Med Sci…	Chen, LM (reprint author), Chinese Acad Med Sci, Dept Nephrol, 1 Shuaifuyuan,Wangfujing St, Beijing 100730, Peoples R China.	climeng2000@yahoo.com.cn			Chinese National Program for Fundamental Research and Development (973 Program) [2012CB517803]; Science Foundation of Ministry of Health [201002010]	The author(s) disclosed receipt of the following financial support for the research, authorship, and/or publication of this article: This work was supported by the Key Project of Chinese National Program for Fundamental Research and Development (973 Program 2012CB517803 to C.L) and Science Foundation of Ministry of Health (201002010 to L.X).		31	1	1	SAGE PUBLICATIONS INC	THOUSAND OAKS	2455 TELLER RD, THOUSAND OAKS, CA 91320 USA	1099-8004	1552-4175		BIOL RES NURS	Biol. Res. Nurs.	JUL	2014	16	3					241
J	Wang, ML; Liu, JE; Wang, HY; Chen, J; Li, YY				Wang, Mu-Lan; Liu, Jun-E; Wang, Hui-Ying; Chen, Jing; Li, Yi-Ying			Posttraumatic growth and associated socio-demographic and clinical factors in Chinese breast cancer survivors	EUROPEAN JOURNAL OF ONCOLOGY NURSING			English	Article						Breast cancer; Posttraumatic growth; Socio-demographic factors; Clinical factors	QUALITY-OF-LIFE; PSYCHOLOGICAL DISTRESS; STRESS-DISORDER; PERSONAL GROWTH; BENEFIT; WOMEN; SYMPTOMS; TRAUMA; HEALTH; WORK	Purpose: The factors that affect posttraumatic growth (PTG) in breast cancer survivors have been discussed for many years, but it remains unclear which are most influential. The purpose of this study was to determine the level of PTG and identify associated socio-demographic and clinical factors in Chinese breast cancer survivors. Methods and sample: A descriptive research design with a convenien…	[Wang, Mu-Lan; Liu, Jun-E; Wang, Hui-Ying; Chen, Jing] Capital Med Univ, Sch Nursing, Beijing 100069, Peoples R China; [Li, Yi-Ying] Capital Med Univ, Beijing Tiantan Hosp, Beijing Neurosurg Inst, Beijing 100050, Peoples R China	Liu, JE (reprint author), Capital Med Univ, Sch Nursing, Beijing 100069, Peoples R China.	wangmulan55@126.com; liujune66@163.com; wanghuiying122@163.com; chenjing-cj@139.com; yyli888@sina.com			National Natural Science Foundation of China, China [30870770]	Funding for this study was provided by National Natural Science Foundation of China, China (grant no. 30870770). Our gratitude goes out to nurses in the 8 tertiary hospitals for their assistance of data collection and to all breast cancer survivors who took part in the study.		43	0	0	ELSEVIER SCI LTD	OXFORD	THE BOULEVARD, LANGFORD LANE, KIDLINGTON, OXFORD OX5 1GB, OXON, ENGLAND	1462-3889	1532-2122		EUR J ONCOL NURS	Eur. J. Oncol. Nurs.	OCT	2014	18	5					478
J	Tai, WP; Lin, XC; Wang, HY; Su, H; Liu, KL; Liu, H; Wang, CH; Meng, MM; Wu, J				Tai, Wei-Ping; Lin, Xiang-Chun; Wang, Hui-Yu; Su, Hui; Liu, Kui-Liang; Liu, Hong; Wang, Cang-Hai; Meng, Min-Min; Wu, Jing			THE REPORT OF FOUR CASES OF PYOGENIC LIVER ABSCESS AND LITERATURE REVIEW IN CHINA	GASTROENTEROLOGY NURSING			English	Article							10 YEARS EXPERIENCE; RISK-FACTORS; RETROSPECTIVE ANALYSIS; CURRENT MANAGEMENT; DRAINAGE; PERIOD		[Tai, Wei-Ping; Lin, Xiang-Chun; Su, Hui; Liu, Kui-Liang; Liu, Hong; Wang, Cang-Hai; Meng, Min-Min; Wu, Jing] Capital Med Univ, Beijing Shijitan Hosp, Dept Gastroenterol, Beijing, Peoples R China; [Wang, Hui-Yu] Capital Med Univ, Beijing Shijitan Hosp, Dept Ultrasound, Beijing, Peoples R China	Tai, WP (reprint author), Capital Med Univ, Beijing Shijitan Hosp, Dept Gastroenterol, Beijing, Peoples R China.							21	0	0	LIPPINCOTT WILLIAMS & WILKINS	PHILADELPHIA	TWO COMMERCE SQ, 2001 MARKET ST, PHILADELPHIA, PA 19103 USA	1042-895X	1538-9766		GASTROENTEROL NURS	Gastroenterol. Nurs.	MAR-APR	2014	37	2					177
J	Liu, WH; Luo, Q; Liu, ZH; Zhao, Q; Xi, QY; Zhao, ZH				Liu, Wei-Hua; Luo, Qin; Liu, Zhi-Hong; Zhao, Qing; Xi, Qun-Ying; Zhao, Zhi-Hui			Differences in pulmonary function and exercise capacity in patients with idiopathic dilated cardiornyopathy and idiopathic pulmonary arterial hypertension	HEART & LUNG			English	Article						Cardiopulmonary exercise testing; Pulmonary function; Right heart failure; Pulmonary arterial hypertension; Dilated cardiomyopathy	CHRONIC HEART-FAILURE; OF-CARDIOLOGY; GAS-EXCHANGE; ASSOCIATION; PATHOPHYSIOLOGY; RECOMMENDATIONS; PERFORMANCE; COMMITTEE	Objectives: We observed the pulmonary function and exercise capacity of idiopathic dilated cardiomyopathy (IDCM) and idiopathic pulmonary arterial hypertension (IPAH) patients using cardiopulmonary exercise testing (CPX). We evaluated and compared the two groups. Background: Pulmonary abnormalities and decreased exercise capacity are common in IDCM and IPAH. Little is known about the differences …	Chinese Acad Med Sci, Fuwai Hosp, Natl Ctr Cardiovasc Dis, State Key Lab Cardiovasc Dis, Beijing 100037, Peoples R China; Peking Union Med Coll, Beijing 100037, Peoples R China	Liu, ZH (reprint author), Fuwai Hosp, 167 Beilishi Rd, Beijing 100037, Peoples R China.	fuwailiu@hotmail.com			National Key Technology R&D Program, China [2011BAI11B15]	This work was supported by the National Key Technology R&D Program, China (grant number: 2011BAI11B15). We thank Xiu-Ping, MA, for excellent work in data collection.		26	0	0	MOSBY-ELSEVIER	NEW YORK	360 PARK AVENUE SOUTH, NEW YORK, NY 10010-1710 USA	0147-9563	1527-3288		HEART LUNG	Heart Lung	JUL-AUG	2014	43	4					317
J	Yang, T; Li, ZN; Chen, G; Gu, Q; Ni, XH; Zhao, ZH; Ye, J; Meng, XM; Liu, ZH; Xiong, CM; He, JG				Yang, Tao; Li, Zhen-Nan; Chen, Guo; Gu, Qing; Ni, Xin-Hai; Zhao, Zhi-Hui; Ye, Jue; Meng, Xian-Min; Liu, Zhi-Hong; Xiong, Chang-Ming; He, Jian-Guo			Increased levels of plasma CXC-Chemokine Ligand 10, 12 and 16 are associated with right ventricular function in patients with idiopathic pulmonary arterial hypertension	HEART & LUNG			English	Article						CXC-chemokine ligand; Pulmonary arterial hypertension; Right ventricular function; Biomarkers	ENDOTHELIAL-CELL GROWTH; RECEPTOR CXCR4; PROGENITOR CELLS; IP-10; INHIBITION; EXPRESSION; PLATELET-FACTOR-4; INFLAMMATION; SURVIVAL; DISEASE	Objective: To investigate plasma levels of CXC-Chemokine Ligand 10 (CXCL10), CXC-Chemokine Ligand 12 (CXCL12) and CXC-Chemokine Ligand 16 (CXCL16) in patients with idiopathic pulmonary arterial hypertension (IPAH). Methods: Plasma levels of biomarkers were measured by enzyme-linked immunosorbent assay in 61 patients with IPAH and 20 healthy volunteers. Results: Plasma CXCL10, CXCL12 and CXCL16 co…	[He, Jian-Guo] Peking Union Med Coll, Fuwai Hosp, Natl Ctr Cardiovasc Dis, State Key Lab Cardiovasc Dis, Beijing 100037, Peoples R China; Chinese Acad Med Sci, Beijing 100037, Peoples R China	He, JG (reprint author), Peking Union Med Coll, Fuwai Hosp, Natl Ctr Cardiovasc Dis, State Key Lab Cardiovasc Dis, Beilishi Rd, Beijing 100037, Peoples R China.	xiongcm2000@163.com; hejianguofw@gmail.com			Ministry of Science and Technology [2011BAI11B15]; Capital Medical Scientific Development Fund Beijing, China [2009-1003]	This study was supported by a national grant from the Ministry of Science and Technology (Project number: 2011BAI11B15) and Capital Medical Scientific Development Fund Beijing, China (Project number: 2009-1003).		33	1	1	MOSBY-ELSEVIER	NEW YORK	360 PARK AVENUE SOUTH, NEW YORK, NY 10010-1710 USA	0147-9563	1527-3288		HEART LUNG	Heart Lung	JUL-AUG	2014	43	4					322
J	Jiang, X; Wei, YX; Wei, Z; Zhang, XF; Jie, L; Achakzai, R; Shuang, L				Jiang, Xie; Wei Yongxiang; Wei, Zhang; Zhang Xiangfeng; Jie, Li; Achakzai, Rehmatullah; Shuang, Liu			Higher dose of warfarin for patients with pulmonary embolism complicated by obstructive sleep apnea hypopnea syndrome	HEART & LUNG			English	Article						Obstructive sleep apnea hypopnea syndrome; Pulmonary embolism; Warfarin	POSITIVE AIRWAY PRESSURE; APOLIPOPROTEIN-E EPSILON-4; VENOUS THROMBOSIS; ASSOCIATION; RISK; INFLAMMATION; GENOTYPE; THERAPY; MARKERS; OBESITY	Background: The concomitant prevalence of obstructive sleep apnea hypopnea syndrome (OSAHS) and pulmonary embolism (PE) is strikingly high, and therefore we studied the patients with PE to determine whether those who had OSHAS required greater warfarin doses to achieve a therapeutic international normalized ratio (INR). Methods: By using computer tomographic pulmonary angiography or pulmonary ang…	[Jiang, Xie; Wei Yongxiang; Wei, Zhang; Zhang Xiangfeng; Jie, Li; Achakzai, Rehmatullah; Shuang, Liu] Capital Med Univ, Beijing Zhen Hosp, Pulm Heart Ctr, Beijing, Peoples R China	Shuang, L (reprint author), Capital Med Univ, Beijing Zhen Hosp, Pulm Heart Ctr, Beijing, Peoples R China.	34447278@qq.com			Beijing Project of Science and Technology [Z101107050210044]	This study is supported by Beijing Project of Science and Technology (Z101107050210044).		33	0	0	MOSBY-ELSEVIER	NEW YORK	360 PARK AVENUE SOUTH, NEW YORK, NY 10010-1710 USA	0147-9563	1527-3288		HEART LUNG	Heart Lung	JUL-AUG	2014	43	4					358
J	Zou, H; Li, Z; Arthur, D; Wang, HX				Zou, Haiou; Li, Zheng; Arthur, David; Wang, Hongxing			Self-management in Chinese people with schizophrenia and their caregivers: A qualitative study on facilitators and barriers	INTERNATIONAL JOURNAL OF MENTAL HEALTH NURSING			English	Article						barrier; caregiver; facilitator; qualitative study; schizophrenia; self-management	MEDICATION COMPLIANCE; SUPPORTED EMPLOYMENT; FOLLOW-UP; SYMPTOMS; FAMILIES; WORK; INTERVENTION; PSYCHOSIS; COMMUNITY; HEALTH	The purpose of this study was to explore facilitators and barriers of self-management from the viewpoint of Chinese people with schizophrenia and their caregivers. A qualitative study using the individual interview method was used. Twenty-one people with schizophrenia and 14 caregivers were interviewed. Three facilitators were identified: family and peer support, positive relationships with healt…	[Zou, Haiou; Li, Zheng] Peking Union Med Coll, Sch Nursing, Beijing 100730, Peoples R China; [Wang, Hongxing] Capital Med Univ, Beijing An Ding Hosp, Beijing, Peoples R China; [Arthur, David] Charles Darwin Univ, Melbourne, Vic, Australia	Li, Z (reprint author), Peking Union Med Coll, Sch Nursing, Dong Dan San Tiao 9, Beijing 100730, Peoples R China.	zhengli@hotmail.com						30	0	0	WILEY-BLACKWELL	HOBOKEN	111 RIVER ST, HOBOKEN 07030-5774, NJ USA	1445-8330	1447-0349		INT J MENT HEALTH NU	Int. J. Ment. Health Nurs.	AUG	2014	23	4					355
J	Yao, XY; Li, Z; Arthur, D; Hu, LL; Cheng, G				Yao, Xiuyu; Li, Zheng; Arthur, David; Hu, Lili; Cheng, Gen			Validation of the Violence Risk Screening-10 instrument among clients discharged from a psychiatric hospital in Beijing	INTERNATIONAL JOURNAL OF MENTAL HEALTH NURSING			English	Article						community mental health; risk assessment; scale; violence	MENTAL-HEALTH-SERVICE; AGGRESSION; CHINA; SCHIZOPHRENIA; CARE; PSYCHOPATHY; PREDICTION; FACILITIES; CHECKLIST; ACTUARIAL	The Violence Risk Screening-10 is one of the few instruments available for evaluating violence risk in mental health clients during and after hospitalization. This prospective study examined the applicability of this brief instrument with a sample of 289 clients in the 6 months after discharge from a general psychiatric hospital in Beijing. During the research period, 24 of the 289 clients demons…	[Yao, Xiuyu; Li, Zheng] Peking Union Med Coll, Sch Nursing, Beijing 100144, Peoples R China; [Hu, Lili; Cheng, Gen] Capital Med Univ, Beijing An Ding Hosp, Beijing, Peoples R China; [Arthur, David] Angeles Univ Fdn, Angeles City, Philippines	Li, Z (reprint author), Peking Union Med Coll, Sch Nursing, 33 Badachu Rd Shijingshan Dist, Beijing 100144, Peoples R China.	zhengli@hotmail.com						40	1	2	WILEY-BLACKWELL	HOBOKEN	111 RIVER ST, HOBOKEN 07030-5774, NJ USA	1445-8330	1447-0349		INT J MENT HEALTH NU	Int. J. Ment. Health Nurs.	FEB	2014	23	1					79
J	Song, LP; Li, XS; Guo, YY; Ye, M; Ma, YL; Guo, M; Du, N; Li, H				Song, Linping; Li, Xiaosong; Guo, Yanyan; Ye, Min; Ma, Yanlan; Guo, Mei; Du, Nan; Li, Hui			Malposition of peripherally inserted central catheter: Experience from 3012 cancer patients	INTERNATIONAL JOURNAL OF NURSING PRACTICE			English	Article						cancer patients; malpositioned catheter; peripherally inserted central catheter	CENTRAL VENOUS CATHETERS; COMPLICATION; VEIN	The objectives of the study are to observe and analyze the causes of 237 patients' malposition peripherally inserted central catheter (PICC) from 3012 patients in clinical practice and to further explore the methods of its prevention and remedies, which can help to improve the skills of placing tubes, to efficiently avoid and reduce the occurrence of complications, and to alleviate the pains and …	[Song, Linping; Li, Xiaosong; Guo, Yanyan; Ye, Min; Ma, Yanlan; Du, Nan; Li, Hui] Chinese Peoples Liberat Army Gen Hosp, Dept Oncol, Affiliated Hosp 1, Beijing 100048, Peoples R China; [Guo, Mei] Chinese Peoples Liberat Army Gen Hosp, Dept Oncol, Beijing 100048, Peoples R China	Ma, YL (reprint author), Chinese Peoples Liberat Army Gen Hosp, Dept Oncol, Affiliated Hosp 1, Beijing 100048, Peoples R China.	Doctor301@sohu.com			National Natural Science Foundation of China [81000994]; Beijing Municipal Science and Technology Commission [Z121107001012080]; Beijing Nova program [Z131107000413104]; First Affiliated Hospital of Chinese PLA General Hospital [ZD201103]	This work was supported in part by Grants from National Natural Science Foundation of China (no. 81000994), Beijing Municipal Science and Technology Commission (no. Z121107001012080), Beijing Nova program (no. Z131107000413104) and the First Affiliated Hospital of Chinese PLA General Hospital (no. ZD201103).		13	0	0	WILEY-BLACKWELL	HOBOKEN	111 RIVER ST, HOBOKEN 07030-5774, NJ USA	1322-7114	1440-172X		INT J NURS PRACT	Int. J. Nurs. Pract.	AUG	2014	20	4					446
J	Lu, N; Gao, XY; Zhang, S				Lu, Nan; Gao, Xiaoyan; Zhang, Shuang			Attitudes on intimate touch during nursing care in China	INTERNATIONAL JOURNAL OF NURSING PRACTICE			English	Article						intimate touch; patient privacy; qualitative research	MALE NURSES; PRIVACY	Although intimate touch is essential to nursing practice, few studies have investigated patients' wishes and how nurses should perform in preserving patient privacy in China. A maximum-variation sample of 18 adults was selected, and semistructured interviews were conducted in two focus groups. Interviews were recorded and transcribed, and thematic analysis was performed. Five themes emerged from …	[Lu, Nan; Zhang, Shuang] Beijing Jishuitan Hosp, Dept Sports Med Serv, Beijing 100035, Peoples R China; [Gao, Xiaoyan] Beijing Jishuitan Hosp, Dept Nursing, Beijing 100035, Peoples R China	Gao, XY (reprint author), Beijing Jishuitan Hosp, Dept Nursing, Beijing 100035, Peoples R China.	jstgxy@sina.com						24	0	0	WILEY-BLACKWELL	HOBOKEN	111 RIVER ST, HOBOKEN 07030-5774, NJ USA	1322-7114	1440-172X		INT J NURS PRACT	Int. J. Nurs. Pract.	APR	2014	20	2					221
J	Li, H; Jiang, YF; Lin, CC				Li, Hui; Jiang, Ya-fang; Lin, Chiu-Chu			Factors associated with self-management by people undergoing hemodialysis: A descriptive study	INTERNATIONAL JOURNAL OF NURSING STUDIES			English	Article						Self-management; Self-efficacy; Hemodialysis; End Stage Renal Disease	STAGE RENAL-DISEASE; QUALITY-OF-LIFE; DIALYSIS PATIENTS; OLDER ADULTS; MORTALITY; PREDICTORS; OUTCOMES	Background: Improving the level of self-management by people undergoing hemodialysis is an effective way to reduce the incidence of mortality and complications and improve quality of life. A better understanding of what influences an individual's level of self-management can help nurses find appropriate ways to improve self-management. Objectives: To examine self-management levels, and discuss th…	[Li, Hui] Beijing Union Med Coll Hosp, Int Med Serv, Beijing 100730, Peoples R China; [Jiang, Ya-fang] Peking Union Med Coll, Sch Nursing, Beijing 100021, Peoples R China; [Lin, Chiu-Chu] Kaohsiung Med Univ, Sch Nursing, Kaohsiung, Taiwan	Jiang, YF (reprint author), Peking Union Med Coll, Sch Nursing, Beijing 100021, Peoples R China.	kathy-lee2004@163.com; jiangyfpumc@gmail.com						51	0	0	PERGAMON-ELSEVIER SCIENCE LTD	OXFORD	THE BOULEVARD, LANGFORD LANE, KIDLINGTON, OXFORD OX5 1GB, ENGLAND	0020-7489	1873-491X		INT J NURS STUD	Int. J. Nurs. Stud.	FEB	2014	51	2					208
J	Ming, ZQ; Prybylski, D; Cheng, F; Airawanwat, R; Zhu, QY; Liu, W; Huang, SB				Ming, Zhongqiang; Prybylski, Dimitri; Cheng, Feng; Airawanwat, Rangsima; Zhu, Qiuying; Liu, Wei; Huang, Shaobiao			Two-Year Prospective Cohort Study on Quality of Life Outcomes Among People Living With HIV After Initiation of Antiretroviral Therapy in Guangxi, China	JANAC-JOURNAL OF THE ASSOCIATION OF NURSES IN AIDS CARE			English	Article						antiretroviral therapy; cohort; Guangxi; China; HIV infection; quality of life	WORLD-HEALTH-ORGANIZATION; SOCIAL SUPPORT; WHOQOL-HIV; INFECTED PATIENTS; HAART ERA; PREDICTORS; BREF; MEN; DETERMINANTS; RELIABILITY	The long-term impact of antiretroviral therapy (ART) on quality of life (QOL) is not well understood in China. From 2007-2008, 332 treatment-naive, HIV-infected adults from five hospitals in Guangxi were enrolled in a 2-year prospective cohort study. Information was collected at the time of ART initiation and during 6-, 12-, and 24-month follow-up visits. Significant improvements were observed ac…	[Ming, Zhongqiang; Cheng, Feng] FHI 360 China Off, Beijing, Peoples R China; [Prybylski, Dimitri] FHI 360 Asia Pacific Reg Off, Bangkok, Thailand; [Cheng, Feng] Tsinghua Univ, Res Ctr Publ Hlth, Beijing 100084, Peoples R China; [Airawanwat, Rangsima] FHI 360 China Off, Kunming City, Yunnan Province, Peoples R China; [Zhu, Qiuying; Liu, Wei] Guangxi Ctr Dis Control & Prevent, Nanning, Guangxi Auto…	Ming, ZQ (reprint author), FHI 360 China Off, Beijing, Peoples R China.				United States Agency for International Development [GHS-I-00-07-0007-00]	The study was supported by United States Agency for International Development (Grant Number: GHS-I-00-07-0007-00) under the TASCIII TASC Order 2 Technical Support for HIV/AIDS Prevention, Care and Treatment - RDMA. We would like to thank Mr. Tang Zhi Rong, Ms. Luo Hui Ping, Mr. Huang Shao Biao, Ms. Mei Qin Ying, Ms. Nong Ying Xing, Mr. Hua He Hai, Ms. Huang Yi Feng, Mr. Shuang Wei Fa, Mr. Li Kai …		42	0	0	ELSEVIER SCIENCE INC	NEW YORK	360 PARK AVE SOUTH, NEW YORK, NY 10010-1710 USA	1055-3290	1552-6917		J ASSOC NURSE AIDS C	J. Assoc. Nurses Aids Care	NOV-DEC	2014	25	6					603
J	Lu, Y; Li, Z; Arthur, D				Lu, Yang; Li, Zheng; Arthur, David			Mapping publication status and exploring hotspots in a research field: chronic disease self-management	JOURNAL OF ADVANCED NURSING			English	Article						bibliometrics; hotspots; nursing; publication status; PubMed; self-management	RANDOMIZED CONTROLLED-TRIAL; PRIMARY-CARE; ADOLESCENTS; ADHERENCE; PROGRAM; SUPPORT; IMPACT	Aim. To provide insight into the characteristics of chronic disease self-management by mapping publication status and exploring hotspots. Background. Chronic disease is becoming a major public health issue worldwide, highlighting the importance of self-management in this area. Despite the volume and variety of publications, little is known about how 'chronic disease self-management' has developed…	[Lu, Yang; Li, Zheng] Peking Union Med Coll, Sch Nursing, Beijing 100021, Peoples R China; [Arthur, David] Charles Darwin Univ, Sch Hlth, Melbourne, Vic, Australia	Li, Z (reprint author), Peking Union Med Coll, Sch Nursing, Beijing 100021, Peoples R China.	zhengli@hotmail.com						31	2	2	WILEY-BLACKWELL	HOBOKEN	111 RIVER ST, HOBOKEN 07030-5774, NJ USA	0309-2402	1365-2648		J ADV NURS	J. Adv. Nurs.	AUG	2014	70	8					1837
J	Liu, YF; Song, X; Zhang, YM; Zhou, L; Ni, RH				Liu, Yufen; Song, Xin; Zhang, Yumeng; Zhou, Lei; Ni, Runhong			The effects of comprehensive mental intervention on the recovery time of patients with postsurgical gastroparesis syndrome	JOURNAL OF CLINICAL NURSING			English	Article						complication; gastrointestinal; gastroparesis; psychology; surgery	INTERSTITIAL-CELLS; SURGERY; MANAGEMENT; CAJAL	Aims and objectives. To explore the effects of comprehensive mental intervention on the recovery time and symptoms of depression in patients with postsurgical gastroparesis syndrome. Background. Postsurgical gastroparesis syndrome may occur after abdominal surgery. The development of postsurgical gastroparesis syndrome is believed to be influenced by neuropsychiatric factors, manifest as psycholo…	[Liu, Yufen; Song, Xin; Zhou, Lei; Ni, Runhong] China Japan Friendship Hosp, Dept Gastrointestinal Surg, Beijing 100029, Peoples R China; [Zhang, Yumeng] Capital Med Univ, Beijing Anzhen Hosp, Dept Nephrol, Beijing, Peoples R China	Song, X (reprint author), China Japan Friendship Hosp, Dept Gastrointestinal Surg, 2 Yinghua East St, Beijing 100029, Peoples R China.	songxin70@hotmail.com						28	0	0	WILEY-BLACKWELL	HOBOKEN	111 RIVER ST, HOBOKEN 07030-5774, NJ USA	0962-1067	1365-2702		J CLIN NURS	J. Clin. Nurs.	NOV	2014	23	21-22					3138
J	Xu, G; Li, N				Xu, G.; Li, N.			A comparison study on mental health status between suicide survivors and survivors of accidental deaths in rural China	JOURNAL OF PSYCHIATRIC AND MENTAL HEALTH NURSING			English	Article						accidental deaths; bereavement; Chinese population; mental health status; suicide survivors	NESTED CASE-CONTROL; PSYCHOLOGICAL AUTOPSY; PSYCHIATRIC-ILLNESS; ADOLESCENT SUICIDE; FAMILY-HISTORY; BEREAVEMENT; RISK; SPOUSES; DEPRESSION; VICTIMS	Suicide has become a major public health problem worldwide. For every suicide there are six suicide survivors, a term referring to family members or friends of a person who has died by suicide. Within the literature there has been ongoing debate regarding the bereavement process and if it differs in survivors of suicide as opposed to survivors of those who have died from accidental death. There a…	[Xu, G.] Tianjin Anding Hosp, Tianjin Mental Hlth Ctr, Beijing, Peoples R China; [Li, N.] Peking Univ, Inst Populat Res, Beijing 100871, Peoples R China	Li, N (reprint author), Peking Univ, Inst Populat Res, 5 Yiheyuan Rd Haidian Dist, Beijing 100871, Peoples R China.	ningli@pku.edu.cn						39	0	0	WILEY-BLACKWELL	HOBOKEN	111 RIVER ST, HOBOKEN 07030-5774, NJ USA	1351-0126	1365-2850		J PSYCHIATR MENT HLT	J. Psychiatr. Ment. Health Nurs.	DEC	2014	21	10					859
J	Yao, X; Li, Z; Arthur, D; Hu, L; An, FR; Cheng, G				Yao, X.; Li, Z.; Arthur, D.; Hu, L.; An, F-R.; Cheng, G.			Acceptability and psychometric properties of Broset Violence Checklist in psychiatric care settings in China	JOURNAL OF PSYCHIATRIC AND MENTAL HEALTH NURSING			English	Article						psychiatry; risk assessment; scale; violence	SHORT-TERM PREDICTION; INTENSIVE-CARE; PSYCHOPATHY CHECKLIST; IMMINENT VIOLENCE; RISK-ASSESSMENT; ACTUARIAL; VERSION	Accessible summary<list list-type="bulleted" id="jpm12132-list-0001"> Short-term risk assessment instrument owns great importance for psychiatric nurses in China; however, the lack of a standardized violence risk assessment instrument has disadvantaged them in clinical practice. The BrOset Violence Checklist (BVC), a behavioural observation tool, is the most frequently cited instrument available …	[Yao, X.; Li, Z.] Peking Union Med Coll, Sch Nursing, Beijing 100144, Peoples R China; [Hu, L.] Capital Med Univ, Beijing An Ding Hosp, Dept Sci & Educ, Beijing, Peoples R China; [An, F-R.; Cheng, G.] Capital Med Univ, Beijing An Ding Hosp, Dept Nursing, Beijing, Peoples R China; [Arthur, D.] Charles Darwin Univ, Sch Hlth, Melbourne, Vic, Australia	Li, Z (reprint author), Peking Union Med Coll, Sch Nursing, 33 Badachu Rd, Beijing 100144, Peoples R China.	zhengli@hotmail.com						28	0	0	WILEY-BLACKWELL	HOBOKEN	111 RIVER ST, HOBOKEN 07030-5774, NJ USA	1351-0126	1365-2850		J PSYCHIATR MENT HLT	J. Psychiatr. Ment. Health Nurs.	NOV	2014	21	9					848
J	Jin, CL; Zhou, XY; Pang, R				Jin, Chunlan; Zhou, Xinyao; Pang, Ran			Effect of Electroacupuncture Combined With Tolterodine on Treating Female Mixed Urinary Incontinence	JOURNAL OF WOUND OSTOMY AND CONTINENCE NURSING			English	Article						acupuncture; combination therapy; tolterodine; urinary incontinence	OVERACTIVE BLADDER; ACUPUNCTURE; WOMEN; URGE; STRESS; SYMPTOMS; EFFICACY; RATS	PURPOSE: To examine the effectiveness of combination therapy of electroacupuncture and tolterodine in treating female patients with mixed urinary incontinence. MATERIALS AND METHODS: Seventy-one women with mixed urinary incontinence were recruited to receive electroacupuncture therapy or combination therapy with electroacupuncture and tolterodine 2 mg orally twice a day for 8 weeks. In electroacu…	[Jin, Chunlan] China Acad Chinese Med Sci, Inst Acupuncture & Moxibust, Beijing 100053, Peoples R China; [Jin, Chunlan] China Acad Chinese Med Sci, Div Gynecol, Hosp Acupuncture & Moxibust, Beijing 100053, Peoples R China; [Zhou, Xinyao] China Acad Chinese Med Sci, Div Internal Med, Guang An Men Hosp, Beijing 100053, Peoples R China; [Pang, Ran] China Acad Chinese Med Sci, Div Urol, Guang An Men …	Pang, R (reprint author), China Acad Chinese Med Sci, Div Urol, Guang An Men Hosp, 5 Bei Xian Ge St, Beijing 100053, Peoples R China.	pangran2002@gmail.com						21	1	1	LIPPINCOTT WILLIAMS & WILKINS	PHILADELPHIA	530 WALNUT ST, PHILADELPHIA, PA 19106-3621 USA	1071-5754	1528-3976		J WOUND OSTOMY CONT	J. Wound Ostomy Cont. Nurs.	MAY-JUN	2014	41	3					268
J	Zhu, XM; Xiang, YT; Zhou, JS; Gou, L; Himelhoch, S; Ungvari, GS; Chiu, HFK; Lai, KYC; Wang, XP				Zhu, Xiao-Min; Xiang, Yu-Tao; Zhou, Jian-Song; Gou, Lei; Himelhoch, Seth; Ungvari, Gabor S.; Chiu, Helen F. K.; Lai, Kelly Y. C.; Wang, Xiao-Ping			Frequency of Physical Restraint and Its Associations With Demographic and Clinical Characteristics in a Chinese Psychiatric Institution	PERSPECTIVES IN PSYCHIATRIC CARE			English	Article						China; physical restraint; psychiatric inpatient	SCHIZOPHRENIC-PATIENTS; EUROPEAN COUNTRIES; SECLUSION; PREVALENCE; AGGRESSION; HOSPITALS; COERCION; HEALTH; SCALE; UNIT	PurposePhysical restraint (PR) is a highly controversal topic in psychiatry. Little is known about PR among psychiatric inpatients in China. This study examined the frequency of PR and its relationships with demographic and clinical characteristics among a large psychiatric institution in the Hunan Province, China. Design and MethodsThe study included a consecutively assessed sample of 160 psychi…	[Zhu, Xiao-Min; Zhou, Jian-Song; Gou, Lei; Wang, Xiao-Ping] Cent S Univ, Xiangya Hosp 2, Mental Hlth Inst, Changsha, Hunan, Peoples R China; [Zhu, Xiao-Min; Zhou, Jian-Song; Gou, Lei; Wang, Xiao-Ping] Key Lab Psychiat & Mental Hlth Hunan Prov, Changsha, Hunan, Peoples R China; [Xiang, Yu-Tao] Capital Med Univ, Beijing Anding Hosp, Beijing, Peoples R China; [Xiang, Yu-Tao; Chiu, Helen F. K.; Lai, …	Xiang, YT (reprint author), Capital Med Univ, Beijing Anding Hosp, Beijing, Peoples R China.	xyutly@gmail.com; xiaop6@126.com			Projects in the National Science & Technology Pillar Program [2012BAK16B00]; National Natural Science Foundation of China (NSFC) [30800368, 81071107]	This work was supported by the Key Projects in the National Science & Technology Pillar Program during the Twelfth Five-Year Plan Period (No. 2012BAK16B00) and the National Natural Science Foundation of China (NSFC, 30800368, 81071107).		39	0	0	WILEY-BLACKWELL	HOBOKEN	111 RIVER ST, HOBOKEN 07030-5774, NJ USA	0031-5990	1744-6163		PERSPECT PSYCHIATR C	Perspect. Psychiatr. Care	OCT	2014	50	4					251
J	Li, YH; Xiang, YT; Su, YA; Shu, L; Yu, X; Kilbourne, AM; Ungvari, GS; Chiu, HFK; Ma, C; Wang, GH; Bai, PS; Liu, XH; Sun, LZ; Shi, JG; Chen, XS; Mei, QY; Li, KQ; Si, TM				Li, You-Hong; Xiang, Yu-Tao; Su, Yun-Ai; Shu, Liang; Yu, Xin; Kilbourne, Amy M.; Ungvari, Gabor S.; Chiu, Helen F. K.; Ma, Cui; Wang, Gao-Hua; Bai, Pei-Shen; Liu, Xie-He; Sun, Li-Zhong; Shi, Jian-Guo; Chen, Xian-Sheng; Mei, Qi-Yi; Li, Ke-Qing; Si, Tian-Mei			Long-Term Benzodiazepine Use in Patients With Major Depressive Disorder in China	PERSPECTIVES IN PSYCHIATRIC CARE			English	Article						Benzodiazepines; China; major depressive disorder; prescribing patterns	INJURIOUS FALLS; EAST-ASIA; POPULATION; EPIDEMIOLOGY; COMMUNITY; ANTIDEPRESSANTS; PRESCRIPTION; DETERMINANTS; INPATIENTS; PATTERNS	PURPOSE: There have been no data about long-term benzodiazepine (BZD) use and its correlates in patients with major depressive disorder (MDD) in China. This study aimed to examine the prevalence of long-term BZD use (more than three months) and its demographic and clinical correlates in Chinese patients with MDD. DESIGN AND METHODS: A total of 1,192 patients with MDD were examined in 10 mental he…	[Li, You-Hong; Su, Yun-Ai; Shu, Liang; Yu, Xin; Si, Tian-Mei] Minist Mental Hlth, Key Lab Mental Hlth, Beijing, Peoples R China; [Li, You-Hong; Su, Yun-Ai; Shu, Liang; Yu, Xin; Si, Tian-Mei] Peking Univ, Inst Mental Hlth, Beijing 100871, Peoples R China; [Xiang, Yu-Tao] Capital Med Univ, Beijing Anding Hosp, Beijing, Peoples R China; [Xiang, Yu-Tao; Chiu, Helen F. K.] Chinese Univ Hong Kong, Dept…	Xiang, YT (reprint author), Capital Med Univ, Beijing Anding Hosp, Beijing, Peoples R China.	xyutly@gmail.com; si.tian-mei@163.com						39	1	1	WILEY-BLACKWELL	HOBOKEN	111 RIVER ST, HOBOKEN 07030-5774, NJ USA	0031-5990	1744-6163		PERSPECT PSYCHIATR C	Perspect. Psychiatr. Care	JUL	2014	50	3					149
J	Zhou, FC; Xiang, YT; Wang, CY; Dickerson, F; Kreyenbuhl, J; Ungvari, GS; Au, RWC; Zhou, JJ; Zhou, Y; Shum, D; Man, D; Lai, KYC; Tang, WK; Yu, X; Chiu, HFK				Zhou, Fu-Chun; Xiang, Yu-Tao; Wang, Chuan-Yue; Dickerson, Faith; Kreyenbuhl, Julie; Ungvari, Gabor S.; Au, Raymond W. C.; Zhou, Jing-Jing; Zhou, Yan; Shum, David; Man, David; Lai, Kelly Y. C.; Tang, Wai-Kwong; Yu, Xin; Chiu, Helen F. K.			Predictive Value of Prospective Memory for Remission in First-Episode Schizophrenia	PERSPECTIVES IN PSYCHIATRIC CARE			English	Article						first-episode schizophrenia; Acute treatment; remission; prospective memory	UNTREATED PSYCHOSIS; TREATMENT RESPONSE; 1ST EPISODE; EXECUTIVE FUNCTION; DURATION; ASSOCIATION; CONSEQUENCES; INTELLIGENCE; DEFICITS	Purpose The study examined the rate of remission in individuals experiencing a first episode of schizophrenia (FES) in China and explored predictors of remission in the acute phase of the illness. Design and Methods Fifty-five FES patients were randomly treated with risperidone, olanzapine, or aripiprazole at therapeutic doses for 8 weeks, and their clinical profiles and cognition were assessed u…	[Zhou, Fu-Chun; Wang, Chuan-Yue; Zhou, Jing-Jing; Zhou, Yan] Capital Med Univ, Beijing Anding Hosp, Beijing, Peoples R China; [Xiang, Yu-Tao] Capital Med Univ, Beijing Anding Hosp, Mood Disorders Ctr, Beijing, Peoples R China; [Xiang, Yu-Tao] Chinese Univ Hong Kong, Dept Psychiat, Hong Kong, Hong Kong, Peoples R China; [Dickerson, Faith] Sheppard Pratt, Stanley Res Program, Baltimore, MD USA; [Kr…	Xiang, YT (reprint author), Capital Med Univ, Beijing Anding Hosp, Mood Disorders Ctr, Beijing, Peoples R China.	xyutly@gmail.com	王, 传跃/C-9369-2015	王, 传跃/0000-0001-6549-3713				53	0	0	WILEY-BLACKWELL	HOBOKEN	111 RIVER ST, HOBOKEN 07030-5774, NJ USA	0031-5990	1744-6163		PERSPECT PSYCHIATR C	Perspect. Psychiatr. Care	APR	2014	50	2					102
J	Liu, MD; Lambert, CE; Lambert, VA				Liu, Mengdan; Lambert, Clinton E.; Lambert, Vickie A.			Caregiver burden and coping patterns of Chinese parents of a child with a mental illness	INTERNATIONAL JOURNAL OF MENTAL HEALTH NURSING			English	Article						caregiver burden; child; Chinese; mental illness; parental coping		The burden of providing care to a family member, who has a mental illness, has been investigated in the past. However, limited research has focused on how parents cope, as they attempt to maintain a functional family life, when they have a child with a mental illness. This study explored, using a descriptive correlational design, the: (i) differences between parents of a child with mental illness…	[Liu, Mengdan; Lambert, Clinton E.; Lambert, Vickie A.] Wuhan Univ, Wuhan HOPE Sch Nursing, Wuhan 430072, Hubei, Peoples R China	Liu, MD (reprint author), Huazhong Univ Sci & Technol, Dept Nursing, Tongji Hosp, Tongji Med Coll, 1095 Jiefang Rd, Wuhan 430030, Hubei, Peoples R China.	liumengdan@hotmail.com						43	12	15	WILEY-BLACKWELL	HOBOKEN	111 RIVER ST, HOBOKEN 07030-5774, NJ USA	1445-8330			INT J MENT HEALTH NU	Int. J. Ment. Health Nurs.	APR	2007	16	2					86
J	Wang, XQ; Lambert, CE; Lambert, VA				Wang, X. Q.; Lambert, C. E.; Lambert, V. A.			Anxiety, depression and coping strategies in post-hysterectomy Chinese women prior to discharge	INTERNATIONAL NURSING REVIEW			English	Article						anxiety; chinese; coping; depression; discharge; hysterectomy	HEART-TRANSPLANT CANDIDATES; SOCIAL SUPPORT; SYMPTOMS; DISTRESS; LIFE	Objective: This survey investigated the relationships among anxiety, depression, coping strategies and demographic characteristics of post-hysterectomy Chinese women before discharge and further determined the best predictors of anxiety and depression among this group. Methods: The sample consisted of 105 women who were administered, 1-2 days prior to discharge, via one-to-one interview, the Zung…	Wuhan Univ, HOPE Sch Nursing, Wuhan 430071, Peoples R China	Wang, XQ (reprint author), Wuhan Univ, HOPE Sch Nursing, 185 Donghu Rd, Wuhan 430071, Peoples R China.	xiaoqin_wang78@hotmail.com						36	17	18	BLACKWELL PUBLISHING	OXFORD	9600 GARSINGTON RD, OXFORD OX4 2DQ, OXON, ENGLAND	0020-8132			INT NURS REV	Int. Nurs. Rev.	SEP	2007	54	3					271
J	Wu, SY; Zhu, W; Wang, ZM; Wang, MZ; Lan, YJ				Wu, Siying; Zhu, Wei; Wang, Zhiming; Wang, Mianzhen; Lan, Yajia			Relationship between burnout and occupational stress among nurses in China	JOURNAL OF ADVANCED NURSING			English	Article						burnout; China; Maslach Burnout Inventory - General Survey; nurses; occupational stress	CARE; MODEL	Aim. This article is a report of a study of occupational burnout among nurses in China.Background. Burnout is described as feelings of emotional exhaustion, depersonalization and reduced personal accomplishment. It is well-known that burnout is a major problem for many professions. Nurses are considered to be particularly susceptible to this. Measuring burnout among nurses is important because th…	Fujian Med Univ, Dept Epidemiol & Hlth Stat, Sch Publ Hlth, Fujian, Peoples R China; Zhengzhou Univ, Dept Social Med, Coll Publ Hlth, Henan, Peoples R China; Sichuan Univ, Dept Occupat Hlth, W China Sch Publ Hlth, Sichuan, Peoples R China	Wu, SY (reprint author), Fujian Med Univ, Dept Epidemiol & Hlth Stat, Sch Publ Hlth, Fujian, Peoples R China.	fmulhy@163.com						17	50	55	BLACKWELL PUBLISHING	OXFORD	9600 GARSINGTON RD, OXFORD OX4 2DQ, OXON, ENGLAND	0309-2402			J ADV NURS	J. Adv. Nurs.	AUG	2007	59	3					233
J	Jiang, XL; Sit, JW; Wong, TKS				Jiang, Xiaolian; Sit, Janet W.; Wong, Thomas K. S.			A nurse-led cardiac rehabilitation programme improves health behaviours and cardiac physiological risk parameters: evidence from Chengdu, China	JOURNAL OF CLINICAL NURSING			English	Article						cardiac physiological risks; cardiac rehabilitation; coronary heart disease; health behaviour; nurse-led; nursing	CORONARY-HEART-DISEASE; RANDOMIZED CONTROLLED-TRIAL; ARTERY BYPASS-SURGERY; ACUTE MYOCARDIAL-INFARCTION; TIME PHYSICAL-ACTIVITY; QUALITY-OF-LIFE; CASE-MANAGEMENT; BLOOD-PRESSURE; SMOKING-CESSATION; EXERCISE CAPACITY	Aim. The aim of this study was to examine the effect of a cardiac rehabilitation programme on health behaviours and physiological risk parameters in patients with coronary heart disease in Chengdu, China. Background. Epidemiological studies indicate a dose-, level- and duration-dependent relationship exists between cardiac behavioural and physiological risks and coronary heart disease incidence a…	Sichuan Univ, W China Sch Nursing, Chengdu 610041, Sichuan, Peoples R China; Hong Kong Polytech Univ, Sch Nursing, Hong Kong, Hong Kong, Peoples R China	Jiang, XL (reprint author), Sichuan Univ, W China Sch Nursing, 37 Guo Xue Xiang,Wu Hou Dist, Chengdu 610041, Sichuan, Peoples R China.	jiang_xiaolian@126.com	Sit, Janet/A-5159-2015					58	28	29	BLACKWELL PUBLISHING	OXFORD	9600 GARSINGTON RD, OXFORD OX4 2DQ, OXON, ENGLAND	0962-1067			J CLIN NURS	J. Clin. Nurs.	OCT	2007	16	10					1886
J	Yu, HD; Petrini, MA				Yu, Hui-Dan; Petrini, Marcia A.			A survey of Chinese nurses' current knowledge of pain in older people	JOURNAL OF CLINICAL NURSING			English	Article						elderly; knowledge; nurses; nursing; pain; survey	CANCER PAIN; MANAGEMENT; EXPERIENCES; ATTITUDES	Aim. To investigate the current level of Chinese nurses' knowledge of pain and pain management in older people. Background. Most research about nurses' knowledge regarding pain has taken place in developed countries; however, limited research in this area has taken place in developing countries and particularly in China. Methods. Registered Nurses (n = 621) in three different hospitals were surve…	Wuhan Univ, Fac HOPE, Sch Nursing, Wuhan 430071, Peoples R China	Yu, HD (reprint author), Wuhan Univ, Fac HOPE, Sch Nursing, Wuhan 430071, Peoples R China.	flyyhd@yahoo.com.cn						30	8	9	BLACKWELL PUBLISHING	OXFORD	9600 GARSINGTON RD, OXFORD OX4 2DQ, OXON, ENGLAND	0962-1067			J CLIN NURS	J. Clin. Nurs.	MAY	2007	16	5					963
J	Liu, YL; Wang, GL				Liu, Yilan; Wang, Guilan			Inpatient satisfaction with nursing care and factors influencing satisfaction in a teaching hospital in China	JOURNAL OF NURSING CARE QUALITY			English	Article						patient satisfaction; quality of care; satisfaction with nursing care	MEASURING PATIENT SATISFACTION; QUALITY; INSTRUMENT	This study examined inpatient satisfaction with nursing care in a teaching hospital in China., Patient satisfaction with nursing care was assessed by a self-designed questionnaire administered to 320 inpatients selected by a convenience sampling method. The patients had a relatively high level of satisfaction with nursing care. Patients' age, educational background, occupation, methods of payment…	Huazhong Univ Sci & Technol, Dept Nursing, Union Hosp, Tongji Med Coll, Wuhan 430022, Peoples R China	Liu, YL (reprint author), Huazhong Univ Sci & Technol, Dept Nursing, Union Hosp, Tongji Med Coll, Wuhan 430022, Peoples R China.	yilanl@yahoo.com						23	14	15	LIPPINCOTT WILLIAMS & WILKINS	PHILADELPHIA	530 WALNUT ST, PHILADELPHIA, PA 19106-3621 USA	1057-3631			J NURS CARE QUAL	J. Nurs. Care Qual.	JUL-SEP	2007	22	3					266
J	Sun, HM; Zhang, JJ; Fu, XD				Sun, HuiMin; Zhang, JunJian; Fu, XueDong			Psychological status, coping, and social support of people living with HIV/AIDS in central China	PUBLIC HEALTH NURSING			English	Article						China; coping; HIV/AIDS; psychological status; social support	HIV; ADJUSTMENT; STRATEGIES; ATTACHMENT; DISTRESS; STRESS; WOMEN	Objective: To investigate psychological status, coping, social support, and psychosocial factors associated with people living with HIV/AIDS in a highly HIV-infected area of central China. Design: Cross-sectional descriptive correlation study. Sample. Of 200 individuals with HIV/AlDS registered at the "Warm Homestead" health care center (central China), all who met the eligibility criteria (n = 1…	Wuhan Univ, Zhongnan Hosp, Dept Neurol, Neuropsychol Lab, Wuhan 430071, Hubei Province, Peoples R China; Wuhan Univ, Zhongnan Hosp, Dept Nursing Adm, Wuhan 430071, Hubei Province, Peoples R China; Wuhan Univ, Zhongnan Hosp, Dept Pediat, Wuhan 430071, Hubei Province, Peoples R China	Sun, HM (reprint author), Wuhan Univ, Zhongnan Hosp, Dept Neurol, Neuropsychol Lab, Wuhan 430071, Hubei Province, Peoples R China.	hmsun2008@yahoo.com						27	13	15	BLACKWELL PUBLISHING	OXFORD	9600 GARSINGTON RD, OXFORD OX4 2DQ, OXON, ENGLAND	0737-1209			PUBLIC HEALTH NURS	Public Health Nurs.	MAR-APR	2007	24	2					132
J	Li, YL; Scott, CS; Li, L				Li, Yinglan; Scott, Craig S.; Li, Li			Chinese nursing students' HIV/AIDS knowledge, attitudes, and practice intentions	APPLIED NURSING RESEARCH			English	Article							PROVIDE CARE; WILLINGNESS; BARRIERS; NURSES	Nurses have important roles in human immunodeficiency virus (HIV)/acquired immunodeficiency syndrome (AIDS) treatment and educational programs. Chinese senior nursing students completed a survey on HIV/AIDS knowledge, attitudes, and practice intentions. A weak positive relationship between attitudes and practice intentions (r = .140, P = .036) was noted. No significant associations between knowle…	[Li, Yinglan] Cent S Univ, Xiangya Hosp, Dept Nursing, Changsha 410008, Hunan, Peoples R China; [Scott, Craig S.] Univ Washington, Sch Med, Det Med Educ & Biomed Informat, Seattle, WA 98195 USA; [Li, Li] Cent S Univ, Sch Nursing, Changsha 410013, Hunan, Peoples R China	Li, YL (reprint author), Cent S Univ, Xiangya Hosp, Dept Nursing, Changsha 410008, Hunan, Peoples R China.							17	9	10	W B SAUNDERS CO-ELSEVIER INC	PHILADELPHIA	1600 JOHN F KENNEDY BOULEVARD, STE 1800, PHILADELPHIA, PA 19103-2899 USA	0897-1897			APPL NURS RES	Appl. Nurs. Res.	AUG	2008	21	3					147
J	Zhang, JP; Ye, M; Huang, HS; Li, LZ; Yang, AY				Zhang, Jingping; Ye, Man; Huang, Haishan; Li, Lezhi; Yang, Aiyun			Depression of chronic medical inpatients in China	ARCHIVES OF PSYCHIATRIC NURSING			English	Article							ANTIHYPERTENSIVE MEDICATIONS; CARDIOVASCULAR-DISEASE; MAJOR DEPRESSION; GLOBAL BURDEN; CARE; ADHERENCE; SYMPTOMS; ADULTS; METAANALYSIS; HYPERTENSION	Odds of major depression have significantly increased among adults with chronic diseases. However, the diagnosis of depression is often unrecognized in China. To know the prevalence of depression in medical inpatients with different chronic diseases and to assess the level of unrecognized depression among hospitalized patients, we assessed depression in patients with cardiovascular disease, diabe…	[Zhang, Jingping; Ye, Man; Huang, Haishan; Li, Lezhi; Yang, Aiyun] Cent S Univ, Sch Nursing, Changsha, Hunan, Peoples R China; [Zhang, Jingping; Ye, Man; Huang, Haishan; Li, Lezhi; Yang, Aiyun] Cent S Univ, Sencond Hosp, Changsha, Hunan, Peoples R China	Zhang, JP (reprint author), Cent S Univ, Sch Nursing, 172 Tongzipo Rd, Changsha, Hunan, Peoples R China.	jpzhang1965@163.com						47	12	12	W B SAUNDERS CO-ELSEVIER INC	PHILADELPHIA	1600 JOHN F KENNEDY BOULEVARD, STE 1800, PHILADELPHIA, PA 19103-2899 USA	0883-9417			ARCH PSYCHIAT NURS	Arch. Psychiatr. Nurs.	FEB	2008	22	1					39
J	Tian, J; Chen, ZC; Hang, LF				Tian, Jun; Chen, Zhen-chun; Hang, Li-fang			The Effects of Nutrition Status of Patients With Digestive System Cancers on Prognosis of the Disease	CANCER NURSING			English	Article						Digestive system tumor; Follow-up study; Nutrition; Quality of life; Survival rate	QUALITY-OF-LIFE; ADVANCED GASTROINTESTINAL CANCER; HOME PARENTERAL-NUTRITION; MULTIMODALITY THERAPY; COLORECTAL-CANCER; PHYSICAL-ACTIVITY; SURVIVAL; MALNUTRITION; INTERVENTION; RADIOTHERAPY	To assess the association between nutrition status and prognosis of patients with digestive system cancer, epidemiological investigations were conducted in 2 periods to obtain information about the patients' nutrition status, survival time, and quality of life. Relative risks and 95% confidence intervals were estimated by logistic regression. Among the patients with esophagus, stomach, and colore…	[Tian, Jun; Hang, Li-fang] Fujian Med Univ, Dept Epidemiol & Hlth Stat, Fuzhou 350004, Fujian Province, Peoples R China; [Chen, Zhen-chun] Fujian Canc Hosp, Fuzhou, Fujian Province, Peoples R China	Tian, J (reprint author), Fujian Med Univ, Dept Epidemiol & Hlth Stat, Fuzhou 350004, Fujian Province, Peoples R China.	tianjunfjmu@126.com			Natural Science Foundation of Fujian [2007J0090]; Foundation of Education Department of Fujian [JB06223]	Supported by the Natural Science Foundation of Fujian (no. 2007J0090) and the Foundation of Education Department of Fujian (no.JB06223).		35	5	5	LIPPINCOTT WILLIAMS & WILKINS	PHILADELPHIA	530 WALNUT ST, PHILADELPHIA, PA 19106-3621 USA	0162-220X			CANCER NURS	Cancer Nurs.	NOV-DEC	2008	31	6					462
J	Feng, S; Chen, L; Wang, G; Chen, A; Qiu, Y				Feng, Suwen; Chen, Liping; Wang, Guidi; Chen, Aiskuang; Qiu, Yeqing			Early oral intake after intra-abdominal gynecological oncology surgery	CANCER NURSING			English	Article						early oral intake; gynecological oncology; intra-abdominal surgery; postoperative	RANDOMIZED CONTROLLED TRIAL; DIET; NUTRITION; IMPACT	To explore and evaluate the safety and efficacy of early oral intake following major abdominal gynecological oncology surgery. During an 11-month period, 60 gynecological oncology patients undergoing major intra-abdominal surgery were enrolled in a randomized controlled clinical trial of semiliquid diet (experimental group) compared with clear feeds (control group) 6 hours after operation. Patien…	[Feng, Suwen; Chen, Liping; Wang, Guidi; Chen, Aiskuang; Qiu, Yeqing] Zhejiang Univ, Sch Med, Womens Hosp, Hangzhou 310006, Zhejiang, Peoples R China	Wang, G (reprint author), Zhejiang Univ, Sch Med, Womens Hosp, Hangzhou 310006, Zhejiang, Peoples R China.	wlsgdwang@yahoo.com						15	4	4	LIPPINCOTT WILLIAMS & WILKINS	PHILADELPHIA	530 WALNUT ST, PHILADELPHIA, PA 19106-3621 USA	0162-220X			CANCER NURS	Cancer Nurs.	MAY-JUN	2008	31	3					209
J	Shen, SN; Xu, Z; Qian, XP; Ding, YT; Yu, LX; Liu, BR				Shen, S. N.; Xu, Z.; Qian, X. P.; Ding, Y. T.; Yu, L. X.; Liu, B. R.			RNA-electroporated CD40-activated B cells induce functional T-cell responses against HepG2 cells	EUROPEAN JOURNAL OF CANCER CARE			English	Article						CD40L; B cell; immunotherapy; hepatocellular carcinoma	ANTIGEN-PRESENTING CELLS; SIGNAL-TRANSDUCTION COMPLEX; DENDRITIC CELLS; HEPATOCELLULAR-CARCINOMA; TUMOR-ANTIGENS; MESSENGER-RNA; GENE-THERAPY; LYMPHOCYTES; CANCER; IMMUNOTHERAPY	Hepatocellular carcinoma (HCC) is one of the incurable tumours in the world. Cell-based immunotherapy, in which antigen-loaded antigen-presenting cells (APCs) are able to elicit T cell responses, has become an alternative treatment for liver cancer. Here, we used HepG2 cells' total RNA-electroporated CD40 ligand-activated B (CD40-B) cells as alternative APC for induction of specific CD8(+) T-cell…	[Shen, S. N.; Xu, Z.; Qian, X. P.; Ding, Y. T.; Yu, L. X.; Liu, B. R.] Nanjing Univ, Sch Med, Affiliated Drum Tower Hosp, Dept Oncol, Nanjing 210008, Peoples R China; [Shen, S. N.; Xu, Z.; Qian, X. P.; Ding, Y. T.; Yu, L. X.; Liu, B. R.] Nanjing Univ, Clin Canc Inst, Nanjing 210008, Peoples R China	Liu, BR (reprint author), Nanjing Univ, Sch Med, Affiliated Drum Tower Hosp, Dept Oncol, Nanjing 210008, Peoples R China.	baoruiliu@nju.edu.cn						39	3	3	WILEY-BLACKWELL	MALDEN	COMMERCE PLACE, 350 MAIN ST, MALDEN 02148, MA USA	0961-5423			EUR J CANCER CARE	Eur. J. Cancer Care	JUL	2008	17	4					404
J	Zhang, MF; Petrini, MA				Zhang, M. F.; Petrini, M. A.			Factors influencing Chinese undergraduate nursing students' perceptions of the nursing profession	INTERNATIONAL NURSING REVIEW			English	Article						attitudes; China; clinical experience; curriculum design; demographic characteristics; undergraduate nursing student	HIGH-SCHOOL-STUDENTS; CAREER; CHOICE	Background: In recent years, with the rapid development of nursing in China, the number of undergraduate nursing students has increased significantly. As professional perception has a great influence on the development of nursing students and the future quality of nursing, exploring factors that influence this perception are very important. Aim: To describe undergraduate nursing students' attitud…	[Petrini, M. A.] Wuhan Univ, HOPE Sch Nursing, Wuhan 430072, Hubei, Peoples R China; [Zhang, M. F.] Wuhan Univ, Renmin Hosp, Dept Emergency, Wuhan 430072, Hubei, Peoples R China	Petrini, MA (reprint author), Wuhan Univ, HOPE Sch Nursing, 115 Donghu Rd, Wuhan 430072, Hubei, Peoples R China.	map@n.ypu.jp						34	2	2	WILEY-BLACKWELL	MALDEN	COMMERCE PLACE, 350 MAIN ST, MALDEN 02148, MA USA	0020-8132			INT NURS REV	Int. Nurs. Rev.	SEP	2008	55	3					274
J	Li, JY; Liu, C; Zou, LQ; Huang, MJ; Yu, CH; You, GY; Jiang, YD; Li, H; Jiang, Y				Li, Jun-Ying; Liu, Chang; Zou, Li-Qun; Huang, Mei-Juan; Yu, Chun-Hua; You, Gui-Ying; Jiang, Yong-Dong; Li, Hong; Jiang, Yu			To tell or not to tell: attitudes of Chinese oncology nurses towards truth telling of cancer diagnosis	JOURNAL OF CLINICAL NURSING			English	Article						attitude; cancer; nurses; nursing; oncology nursing; truth telling	BREAKING BAD-NEWS; INFORMATION NEEDS; PALLIATIVE CARE; PSYCHIATRIC MORBIDITY; PHYSICIANS ATTITUDES; MEDICAL-ETHICS; PATIENTS VIEWS; DISCLOSURE; COMMUNICATION; FAMILIES	Aims and objectives. To investigate the attitude of oncology nurses towards whether and how to disclose diagnoses to patients with early-stage cancer or terminal illness. Background. The attitudes of patients and doctors towards the disclosure of cancer diagnosis differed from culture to culture. However, little research has focused on the attitudes of Chinese oncology nurses. Design. Survey. Met…	[Li, Jun-Ying; Zou, Li-Qun; Huang, Mei-Juan; Yu, Chun-Hua; Li, Hong; Jiang, Yu] Sichuan Univ, W China Hosp, State Key Lab Biotherapy, Ctr Canc, Chengdu 610041, Peoples R China; [Li, Jun-Ying; Yu, Chun-Hua; You, Gui-Ying; Jiang, Yong-Dong; Li, Hong] Sichuan Univ, W China Hosp, Dept Nursing, Chengdu 610041, Peoples R China; [Liu, Chang] Sichuan Univ, W China Hosp, Dept Radiol, Chengdu 610041, Peopl…	Jiang, Y (reprint author), Sichuan Univ, W China Hosp, State Key Lab Biotherapy, Ctr Canc, Chengdu 610041, Peoples R China.	jiangyu1973@hotmail.com						54	7	8	WILEY-BLACKWELL	MALDEN	COMMERCE PLACE, 350 MAIN ST, MALDEN 02148, MA USA	0962-1067			J CLIN NURS	J. Clin. Nurs.	SEP	2008	17	18					2463
J	Qiu, YR; Li, SJ				Qiu, Yanru; Li, Sijian			Stroke: coping strategies and depression among Chinese caregivers of survivors during hospitalisation	JOURNAL OF CLINICAL NURSING			English	Article						caregivers; coping strategies; depression; hospitalisation; nursing; stroke	QUALITY-OF-LIFE; MENTAL STATUS QUESTIONNAIRE; 5-ITEM BARTHEL INDEX; INFORMAL CAREGIVERS; FAMILY CAREGIVERS; SHORT-FORM; CES-D; CARE; DETERMINANTS; ANXIETY	Aims and objectives. The main aim of this study was to identify the coping strategies of stroke caregivers, to identify the factors associated with caregivers' depression and to identify predictors of caregivers' depression. Background. Stroke has a high incidence in China. Most stroke survivors are accompanied by family caregivers during hospitalisation. However, little is known about these info…	[Qiu, Yanru] Wuhan Univ, Renmin Hosp, Dept Oncol, Wuhan 430060, Peoples R China; [Li, Sijian] Wuhan Univ, Sch Nursing, Wuhan 430072, Peoples R China	Qiu, YR (reprint author), Wuhan Univ, Renmin Hosp, Dept Oncol, 238 Szefang Rd, Wuhan 430060, Peoples R China.	qiuyr1006@163.com						54	15	18	WILEY-BLACKWELL	MALDEN	COMMERCE PLACE, 350 MAIN ST, MALDEN 02148, MA USA	0962-1067			J CLIN NURS	J. Clin. Nurs.	JUN	2008	17	12					1563
J	Zang, YL; Chung, LYF; Wong, TKS				Zang, Yu-Li; Chung, Loretta Y. F.; Wong, Thomas K. S.			A review of the psychosocial issues for nurses in male genitalia-related care	JOURNAL OF CLINICAL NURSING			English	Review						male genitalia; male patient; nursing; psychosocial; sexuality; staff	BENIGN PROSTATIC HYPERPLASIA; HOME-CARE; URINARY-INCONTINENCE; SEXUAL DYSFUNCTION; TESTICULAR CANCER; MENS HEALTH; DIRTY WORK; GENDER; TOUCH; PERCEPTIONS	This literature review aimed to highlight psychosocial issues for nurses in the practice of male genitalia-related care so as to guide the improvement of the teaching and practice of male genitalia-related care. Male genitalia-related care is common in hospitals and in the community. In several conditions, e.g. incontinence, postradiotherapy or following operation for cancer of genitalia, bladder…	[Zang, Yu-Li] Shandong Univ, Sch Nursing, Jinan 250012, Shandong, Peoples R China; [Zang, Yu-Li; Chung, Loretta Y. F.; Wong, Thomas K. S.] Hong Kong Polytech Univ, Sch Nursing, Hong Kong, Hong Kong, Peoples R China; [Wong, Thomas K. S.] Hong Kong Polytech Univ, Fac Hlth & Social Sci, Hong Kong, Hong Kong, Peoples R China	Zang, YL (reprint author), Shandong Univ, Sch Nursing, 44 Jinan Wenhua W Rd, Jinan 250012, Shandong, Peoples R China.	yulizh@sdu.edu.cn						71	7	7	BLACKWELL PUBLISHING	OXFORD	9600 GARSINGTON RD, OXFORD OX4 2DQ, OXON, ENGLAND	0962-1067			J CLIN NURS	J. Clin. Nurs.	APR	2008	17	8					983
J	Cai, ZX; Li, K; Zhang, XC				Cai, Zhong-Xiang; Li, Kun; Zhang, Xun-Cheng			Workplace stressors and coping strategies among Chinese psychiatric nurses	PERSPECTIVES IN PSYCHIATRIC CARE			English	Article						Chinese psychiatric nurses; coping strategies; workplace stressors	HOSPITAL NURSES; MENTAL-HEALTH; MANAGEMENT	PURPOSE. This study was conducted with Chinese psychiatric nurses to identify their workplace stressors and coping strategies, as well as the relationships between their demographics, workplace stressors, and coping strategies. DESIGN AND METHODS. This survey was conducted, with the use of three questionnaires, on 188 psychiatric nurses recruited via convenient sampling in central China. FINDINGS…	[Cai, Zhong-Xiang; Li, Kun; Zhang, Xun-Cheng] Wuhan Univ, Renmin Hosp, Nursing Off, Wuhan 430072, Hubei, Peoples R China	Cai, ZX (reprint author), Wuhan Univ, Renmin Hosp, Nursing Off, Wuhan 430072, Hubei, Peoples R China.	quentin_1979@yahoo.cn						28	4	4	BLACKWELL PUBLISHING	OXFORD	9600 GARSINGTON RD, OXFORD OX4 2DQ, OXON, ENGLAND	0031-5990			PERSPECT PSYCHIATR C	Perspect. Psychiatr. Care	OCT	2008	44	4					223
J	Zhang, JP; Yao, SQ; Ye, M; Huang, HS; He, GP; Leng, XH				Zhang, Jing Ping; Yao, Shu Qiao; Ye, Man; Huang, Hai Shan; He, Guo Ping; Leng, Xiao Hong			A study on the subjective well-being and its influential factors in chronically ill inpatients in Changsha, China	APPLIED NURSING RESEARCH			English	Article							QUALITY-OF-LIFE; CHRONIC DISEASES; ANXIETY DISORDERS; UNITED-STATES; PERCEPTIONS; DEPRESSION; PEOPLE; HAPPY	The aim of this paper is to assess the subjective well-being of chronically ill inpatients to know which its influential factors are, what the significant predictors of SWB are, and what we can do in nursing care. A sample of 290 inpatients with chronic respiratory diseases, diabetes, and cardiovascular diseases responded to questionnaires assessing well-being, anxiety, and depression and gave su…	[Yao, Shu Qiao] Cent S Univ, Xiangya Hosp 2, Changsha 410011, Hunan, Peoples R China; [Zhang, Jing Ping; Ye, Man; Huang, Hai Shan; He, Guo Ping; Leng, Xiao Hong] Cent S Univ, Sch Nursing, Changsha 410013, Hunan, Peoples R China	Yao, SQ (reprint author), Cent S Univ, Xiangya Hosp 2, Changsha 410011, Hunan, Peoples R China.	shuqiaoyao@163.com			Health Department of Hunan Province in China [ZD02-01]	The authors gratefully acknowledge the support and funding received from the Health Department of Hunan Province in China (series number: ZD02-01), the modification by Gabrielle Page (Department of Psychology, McGill University, 1205 Dr. Penfield Avenue, Montreal, Qc, Canada H3A 1B1) and the help of the head nurses of these wards, who extended their assistance in the data collection of the study.…		49	1	3	W B SAUNDERS CO-ELSEVIER INC	PHILADELPHIA	1600 JOHN F KENNEDY BOULEVARD, STE 1800, PHILADELPHIA, PA 19103-2899 USA	0897-1897			APPL NURS RES	Appl. Nurs. Res.	NOV	2009	22	4					250
J	Tian, J; Chen, ZC; Hang, LF				Tian, Jun; Chen, Zhen-chun; Hang, Li-Fang			The Effects of Psychological Status of the Patients With Digestive System Cancers on Prognosis of the Disease	CANCER NURSING			English	Article						Anxiety; Depression; Digestive system tumor; Follow-up study; Quality of life; Survival rate	METASTATIC BREAST-CANCER; SURVIVAL; DEPRESSION	To assess the association between psychological status and prognosis of patients with digestive system cancer, epidemiological investigations were conducted in 2 periods to obtain information about the patients' psychological status, survival time, and quality of life. Adjusted relative risks (95% confidence interval) of 1-year survival rate for anxiety and depression were 8.43 (1.18-60.20) and 9…	[Tian, Jun; Hang, Li-Fang] Fujian Med Univ, Dept Epidemiol & Hlth Stat, Fuzhou 350004, Fujian Province, Peoples R China; [Chen, Zhen-chun] Fujian Canc Hosp, Fuzhou 350004, Fujian Province, Peoples R China	Tian, J (reprint author), Fujian Med Univ, Dept Epidemiol & Hlth Stat, Fuzhou 350004, Fujian Province, Peoples R China.	tianjunfjmu@126.com			Natural Science Foundation of Fujian [2007J0090]; Foundation of Education Department of Fujian [JB06223]	Supported by the Natural Science Foundation of Fujian (no. 2007J0090) and the Foundation of Education Department of Fujian (no. JB06223).		27	7	8	LIPPINCOTT WILLIAMS & WILKINS	PHILADELPHIA	530 WALNUT ST, PHILADELPHIA, PA 19106-3621 USA	0162-220X			CANCER NURS	Cancer Nurs.	MAY-JUN	2009	32	3					230
J	Zhang, XG; Sun, ZQ; Zhang, DY; Zheng, LQ; Li, J; Liu, SS; Xu, CL; Li, JJ; Hu, DY; Sun, YX				Zhang, Xingang; Sun, Zhaoqing; Zhang, Dayi; Zheng, Liqiang; Li, Jue; Liu, Shuangshuang; Xu, Changlu; Li, Jiajin; Hu, Dayi; Sun, Yingxian			Prevalence and association with diabetes and obesity of lipid phenotypes among the hypertensive Chinese rural adults	HEART & LUNG			English	Article							CORONARY-HEART-DISEASE; SINO-MONICA PROJECT; HONG-KONG CHINESE; CHOLESTEROL LEVELS; LIPOPROTEIN CHOLESTEROL; CARDIOVASCULAR-DISEASE; BLOOD CHOLESTEROL; RISK-FACTORS; WOMEN; DYSLIPIDEMIA	BACKGROUND: Both dyslipidemia and hypertension are important risk factors for cardiovascular disease. Studies have found that there is a higher risk of dyslipidemia among hypertensive patients. This study was designed to investigate the epidemiologic features of some forms of dyslipidemia in rural hypertensive adults in China. METHODS: A cross-sectional survey was conducted during 2004 to 2006 th…	[Zhang, Xingang; Sun, Zhaoqing; Zheng, Liqiang; Liu, Shuangshuang; Xu, Changlu; Li, Jiajin; Sun, Yingxian] China Med Univ, Shengjing Hosp, Dept Cardiol, Shenyang 110004, Peoples R China; [Li, Jue; Hu, Dayi] Tongji Univ, Heart Lung & Blood Vessel Ctr, Shanghai 200092, Peoples R China	Sun, YX (reprint author), China Med Univ, Shengjing Hosp, Dept Cardiol, Shenyang 110004, Peoples R China.				key technology Research and Development program of Liaoning Province [2003225003]	Supported by grants from the key technology Research and Development program of Liaoning Province (2003225003).		34	0	1	MOSBY-ELSEVIER	NEW YORK	360 PARK AVENUE SOUTH, NEW YORK, NY 10010-1710 USA	0147-9563	1527-3288		HEART LUNG	Heart Lung	JAN-FEB	2009	38	1					17
J	Yu, HB; Liu, YF; Li, SZ; Ma, XM				Yu, Haibo; Liu, Yongfeng; Li, Shuzhen; Ma, Xiaoming			Effects of music on anxiety and pain in children with cerebral palsy receiving acupuncture: A randomized controlled trial	INTERNATIONAL JOURNAL OF NURSING STUDIES			English	Article						Acupuncture; Anxiety; Cerebral palsy; Music; Pain	THERAPY; SCALE; MANAGEMENT; LIDOCAINE; SURGERY; CARE	Objectives: To study the effects of music on anxiety and pain in children with cerebral palsy receiving acupuncture daily in a clinical setting. Design: A randomized controlled trial. Setting: Acupuncture Unit at Shenzhen Hospital of Traditional Chinese Medicine in Shenzhen City of China. Participants: Sixty children with cerebral palsy undergoing acupuncture. Methods: Intervention: Children list…	[Yu, Haibo; Liu, Yongfeng; Li, Shuzhen; Ma, Xiaoming] Tradit Chinese Med Hosp Shenzhen, Dept Acupuncture & Moxibust, Shenzhen 518000, Guangdong, Peoples R China	Li, SZ (reprint author), Tradit Chinese Med Hosp Shenzhen, Dept Acupuncture & Moxibust, 1 Fu Hua Rd, Shenzhen 518000, Guangdong, Peoples R China.	keen_liu2511337@hotmail.com			Shenzhen City Foundation for Science and Technology [200703258]	Shenzhen City Foundation for Science and Technology (health care science, project 200703258).		27	8	10	PERGAMON-ELSEVIER SCIENCE LTD	OXFORD	THE BOULEVARD, LANGFORD LANE, KIDLINGTON, OXFORD OX5 1GB, ENGLAND	0020-7489			INT J NURS STUD	Int. J. Nurs. Stud.	NOV	2009	46	11					1423
J	Yang, M; Guo, QJ; Zhang, XT; Sun, SG; Wang, YH; Zhao, LW; Hu, EX; Li, CY				Yang Meng; Guo Qingjie; Zhang Xiangtong; Sun Shugang; Wang Yaohua; Zhao Liwei; Hu Enxi; Li Changyu			Intensive insulin therapy on infection rate, days in NICU, in-hospital mortality and neurological outcome in severe traumatic brain injury patients: A randomized controlled trial	INTERNATIONAL JOURNAL OF NURSING STUDIES			English	Article						Intensive insulin therapy; Severe brain trauma; Hyperglycemia; Nursing	INTERVENTION SCORING SYSTEM; HEAD-INJURY; HYPERGLYCEMIA; MANAGEMENT; GLUCOSE; STRESS; STROKE	Objectives: Evaluate the impact of an intensive insulin therapy and conventional glucose control protocol during staying in neurological intensive care unit (NICU) on infection rate, days in NICU, in-hospital mortality and long-term neurological outcome in severe traumatic brain injury (TBI) patients. Methods: A total of 240 patients with severe TBI (GCS score 3-8) admitted to NICU were prospecti…	[Guo Qingjie] Harbin Med Coll, Affiliated Hosp 1, Dept Neurosurg, Harbin, Peoples R China; [Yang Meng; Zhang Xiangtong; Sun Shugang; Wang Yaohua; Zhao Liwei; Hu Enxi; Li Changyu] Harbin Med Coll, Affiliated Hosp 1, Dept Emergency Neurosurg, Harbin, Peoples R China; [Yang Meng; Zhang Xiangtong; Sun Shugang; Wang Yaohua; Zhao Liwei; Hu Enxi; Li Changyu] Harbin Med Coll, Affiliated Hosp 1, Neurol In…	Guo, QJ (reprint author), Harbin Med Coll, Affiliated Hosp 1, Dept Neurosurg, Harbin, Peoples R China.	guoqingjie188@yahoo.com.cn			Nature Science Foundation of Heilongjiang Province [D200847]	This research was supported partly by the Nature Science Foundation of Heilongjiang Province (D200847).		22	30	35	PERGAMON-ELSEVIER SCIENCE LTD	OXFORD	THE BOULEVARD, LANGFORD LANE, KIDLINGTON, OXFORD OX5 1GB, ENGLAND	0020-7489			INT J NURS STUD	Int. J. Nurs. Stud.	JUN	2009	46	6					753
J	Li, M; Wei, L; Liu, H; Tang, L				Li, M.; Wei, L.; Liu, H.; Tang, L.			Integrative review of international nursing research in Mainland China	INTERNATIONAL NURSING REVIEW			English	Review						Education; Mainland China; Nursing; Publications; PubMed; Research	REPUBLIC-OF-CHINA	Nursing research in Mainland China is divided into two parts: domestic nursing research, comprising all publications in Chinese; and international nursing research, comprising all publications in English. Domestic nursing research has been developing rapidly, demonstrated by the increase in new national or regional journals and publications. However, little is known about the extent of internatio…	[Li, M.] Shandong Univ, Sch Nursing, Jinan 250012, Shandong, Peoples R China; [Wei, L.] Qingdao Univ, Affiliated Hosp Med Coll, Dept Nursing, Qingdao 266071, Shandong, Peoples R China; [Liu, H.] Shandong Elect Power Cent Hosp, Dept Surg, Jinan, Peoples R China; [Tang, L.] Pudong New Area Shanghai Steel Community Hlth Ser, Dept Radiol, Shanghai, Peoples R China	Li, M (reprint author), Shandong Univ, Sch Nursing, 44 Wenhuaxi Rd, Jinan 250012, Shandong, Peoples R China.	liming74@sdu.edu.cn						11	3	3	WILEY-BLACKWELL PUBLISHING, INC	MALDEN	COMMERCE PLACE, 350 MAIN ST, MALDEN 02148, MA USA	0020-8132			INT NURS REV	Int. Nurs. Rev.	MAR	2009	56	1					28
J	Qin, QR; Ji, GP; Xu, J; Jiang, QC; Hong, H; Chu, XY; Chen, R; Ye, DQ				Qin, Qi-Rong; Ji, Guo-Ping; Xu, Juan; Jiang, Qi-Cheng; Hong, Hang; Chu, Xiao-Yue; Chen, Ran; Ye, Dong-Qing			Risk of Sexual HIV Transmission Among Wives Left Behind and Wives of Nonmigrant Men in Rural Areas of China	JANAC-JOURNAL OF THE ASSOCIATION OF NURSES IN AIDS CARE			English	Article						China; condom use; HIV infection; married women; rural; sexual behavior	COMMERCIAL PLASMA DONORS; TO-URBAN MIGRANTS; EASTERN CHINA; INFECTION; MIGRATION; BEHAVIOR; WORKERS	In rural areas of China where commercial plasma donation used to be common, little is known about sexual behaviors and condom use among wives left behind by migrating husbands and wives of nonmigrant men. This study investigated sexual behaviors and condom use among married women in rural areas of China. A cross-sectional survey was conducted with 1,873 participants recruited by a cluster-samplin…	[Qin, Qi-Rong; Hong, Hang; Chu, Xiao-Yue; Chen, Ran; Ye, Dong-Qing] Anhui Med Univ, Dept Epidemiol & Biostat, Sch Publ Hlth, Hefei, Anhui, Peoples R China; [Qin, Qi-Rong] Maanshan Ctr Dis Control & Prevent, Maanshan, Anhui, Peoples R China; [Xu, Juan] Chinese Ctr Dis Control & Prevent, Natl Ctr AIDS Sexually Transmitted Dis Control &, Beijing, Peoples R China; [Jiang, Qi-Cheng] Anhui Med Univ, Sc…	Qin, QR (reprint author), Anhui Med Univ, Dept Epidemiol & Biostat, Sch Publ Hlth, Hefei, Anhui, Peoples R China.				United Nations Theme Group on Gender (UNTGG) [2007-2-13]; Global Fund for AIDS program in Anhui, China	The authors thank all participants for their valuable effort and time, and also Dr. Leijun Ma, Dr. Fanni Chen, Dr. Aagela Ongoco, and Professor Fangming Pan for valuable suggestions. This research was supported by United Nations Theme Group on Gender (UNTGG, 2007-2-13) and Global Fund for AIDS program in Anhui, China.		18	4	4	ELSEVIER SCIENCE INC	NEW YORK	360 PARK AVE SOUTH, NEW YORK, NY 10010-1710 USA	1055-3290			J ASSOC NURSE AIDS C	J. Assoc. Nurses Aids Care	JUL-AUG	2009	20	4					308
J	Li, XH; Wang, HH; Williams, A; He, GP				Li, Xianhong; Wang, Honghong; Williams, Ann; He, Guoping			Stigma Reported by People Living With HIV in South Central China	JANAC-JOURNAL OF THE ASSOCIATION OF NURSES IN AIDS CARE			English	Article						AIDS; antiretroviral treatment; China; discrimination; HIV; poverty; stigma	HIV/AIDS; DISCRIMINATION; AFRICA; WOMEN	This cross-sectional study described the level of stigma reported by people living with HIV (PLWH) in south central China and identified factors associated with the individuals' perceptions of stigma. The authors carried out face-to-face interviews among 322 PLWH. Over half (51%) reported experiencing stigma, 78% reported feelings of negative self-worth, 75% reported interpersonal insecurity, 84%…	[Li, Xianhong; Wang, Honghong; He, Guoping] Cent S Univ, Sch Nursing, Changsha, Hunan, Peoples R China; [Williams, Ann] Yale Univ, Sch Nursing, New Haven, CT 06536 USA	Li, XH (reprint author), Cent S Univ, Sch Nursing, Changsha, Hunan, Peoples R China.							23	14	16	ELSEVIER SCIENCE INC	NEW YORK	360 PARK AVE SOUTH, NEW YORK, NY 10010-1710 USA	1055-3290			J ASSOC NURSE AIDS C	J. Assoc. Nurses Aids Care	JAN-FEB	2009	20	1					22
J	Ning, S; Zhong, H; Wang, LB; Li, QJ				Ning, Sun; Zhong, He; Wang Libo; Li Qiujie			The impact of nurse empowerment on job satisfaction	JOURNAL OF ADVANCED NURSING			English	Article						China; empowerment; impact; job satisfaction; nurse managers; nurses; work environment	WORK EFFECTIVENESS; STRUCTURAL POWER; KANTER THEORY; ORGANIZATIONS; QUALITY; HEALTH; STRAIN	Title. The impact of nurse empowerment on job satisfaction. Aim. This paper is a report of a study conducted to test Kanter's organizational empowerment theoretical model specifying the relationships among demographics, structural empowerment, and job satisfaction. Background. Empowerment has become an increasingly important factor in determining nurses' job satisfaction in current restructured w…	[Wang Libo; Li Qiujie] Harbin Med Univ, Sch Nursing, Affiliated Hosp 2, Harbin, Peoples R China; [Wang Libo; Li Qiujie] Harbin Med Univ, Dept Nursing, Affiliated Hosp 2, Harbin, Peoples R China; [Ning, Sun; Zhong, He] Beijing Union Med Coll Hosp, Dept Obstet & Gynecol, Beijing, Peoples R China; [Ning, Sun; Zhong, He] Chinese Acad Med Sci, Sch Nursing, Peking Union Med Coll, Beijing 100037, People…	Li, QJ (reprint author), Harbin Med Univ, Sch Nursing, Affiliated Hosp 2, Harbin, Peoples R China.	l.qiujie1949@yahoo.com.cn						28	17	17	WILEY-BLACKWELL	HOBOKEN	111 RIVER ST, HOBOKEN 07030-5774, NJ USA	0309-2402			J ADV NURS	J. Adv. Nurs.	DEC	2009	65	12					2642
J	Wang, J; Zang, S; Shan, TM				Wang, Jian; Zang, Shuang; Shan, Tianming			Dundee Ready Education Environment Measure: psychometric testing with Chinese nursing students	JOURNAL OF ADVANCED NURSING			English	Article						Chinese; Dundee Ready Education Environment Measure; nurse education; nursing students; psychometric testing	CLINICAL LEARNING-ENVIRONMENT; MEASURE DREEM; MEDICAL-EDUCATION; PERCEPTIONS; CLIMATE; INSTRUMENT; CURRICULUM; INVENTORY; SCHOOL; SUPERVISION	Title. Dundee Ready Education Environment Measure: psychometric testing with Chinese nursing students. Aim. This paper is a report of the psychometric testing of the Dundee Ready Education Environment Measure with Chinese nursing students. Background. Although the Dundee Ready Education Environment Measure has been widely used to measure educational environments in the healthcare professions, no …	[Wang, Jian; Zang, Shuang] China Med Univ, Sch Nursing, Shenyang, Peoples R China; [Shan, Tianming] China Med Univ, Fac Social Sci, Shenyang, Peoples R China	Wang, J (reprint author), China Med Univ, Sch Nursing, Shenyang, Peoples R China.	wangjian3015@163.com						32	6	7	WILEY-BLACKWELL PUBLISHING, INC	MALDEN	COMMERCE PLACE, 350 MAIN ST, MALDEN 02148, MA USA	0309-2402			J ADV NURS	J. Adv. Nurs.	DEC	2009	65	12					2701
J	Zhang, L; Yuan, QJ; Wu, QL; Sabrina, K; Liao, XJ; Wang, CL				Zhang Lei; Yuan Qiongjing; Wu Qiuli; Sabrina, Kwauk; Liao Xiaojing; Wang Changli			Sleep quality and sleep disturbing factors of inpatients in a Chinese general hospital	JOURNAL OF CLINICAL NURSING			English	Article						China; hospitalised patients; nurse; sleep; sleep quality; the Pittsburgh Sleep Quality Index	ENVIRONMENTAL NOISE; CARE-UNIT; DEPRIVATION; DISRUPTION; NIGHT	Aims and objective. This study was undertaken to determine sleep quality and sleep disturbing factors of inpatients and to compare the perception of sleep disturbing factors between nurses and inpatients in a Chinese general hospital. Background. Sleep aids patients' recovery. A variety of factors affect inpatients' sleep quality. Current research on inpatients' sleep quality in China is limited …	[Zhang Lei; Wang Changli] Tianjin Med Univ, Canc Inst & Hosp, Tianjin Lung Canc Ctr, Dept Thorac Surg, Tianjin 300060, Peoples R China; [Yuan Qiongjing] Cent S Univ, Xiangya Hosp, Changsha, Hunan, Peoples R China; [Sabrina, Kwauk] Harvard Univ, Dept Publ Hlth, Cambridge, MA 02138 USA; [Liao Xiaojing] Cent S Univ, Xiangya Hosp 2, Changsha, Hunan, Peoples R China	Wang, CL (reprint author), Tianjin Med Univ, Canc Inst & Hosp, Tianjin Lung Canc Ctr, Dept Thorac Surg, Tianjin 300060, Peoples R China.	chinaray728@gmail.com						37	2	2	WILEY-BLACKWELL	MALDEN	COMMERCE PLACE, 350 MAIN ST, MALDEN 02148, MA USA	0962-1067			J CLIN NURS	J. Clin. Nurs.	SEP	2009	18	17					2521
J	Zhao, SH; Akkadechanunt, T; Xue, XL				Zhao, Shi Hong; Akkadechanunt, Thitinut; Xue, Xiu Li			Quality nursing care as perceived by nurses and patients in a Chinese hospital	JOURNAL OF CLINICAL NURSING			English	Article						care; nurses; nursing; patients; perceptions; quality	GROUNDED THEORY; PATIENTS PERCEPTIONS; PERSPECTIVE; HEALTH	To explore and compare nurses and patients perceptions of quality nursing care. It is important to measure both nurses and patients perceptions of quality nursing care. To date, however, no study on nurses' perceptions of quality nursing care has been conducted specifically in the Chinese setting. Descriptive, comparative study with 221 nurses and 383 patients in 18 non-ICU inpatient nursing unit…	[Zhao, Shi Hong] Harbin Med Coll, Affiliated Hosp 2, Dept Neurosurg 1, Heilongjiang, Peoples R China; [Akkadechanunt, Thitinut] Chiang Mai Univ, Fac Nursing, Chiang Mai 50000, Thailand; [Xue, Xiu Li] Harbin Med Coll, Affiliated Hosp 2, Dept Gen 2, Heilongjiang, Peoples R China	Zhao, SH (reprint author), Harbin Med Coll, Affiliated Hosp 2, Dept Neurosurg 1, Heilongjiang, Peoples R China.	zhaoshihong1973@yahoo.com.cn						39	3	5	WILEY-BLACKWELL PUBLISHING, INC	MALDEN	COMMERCE PLACE, 350 MAIN ST, MALDEN 02148, MA USA	0962-1067			J CLIN NURS	J. Clin. Nurs.	JUN	2009	18	12					1722
J	Yang, J; Li, SJ; Zheng, YL				Yang, Juan; Li, Sijian; Zheng, Yanling			Predictors of depression in Chinese community-dwelling people with type 2 diabetes	JOURNAL OF CLINICAL NURSING			English	Article						depression; nurses; nursing; social support; Taiwan; type 2 diabetes	PERCEIVED SOCIAL SUPPORT; MULTIDIMENSIONAL SCALE; PSYCHOSOCIAL FACTORS; COMORBID DEPRESSION; MAJOR DEPRESSION; RISK-FACTORS; SELF-CARE; SYMPTOMS; PREVALENCE; POPULATION	To examine levels of perceived social support and depression and to identify the related factors and predictors of depression among Chinese community-dwelling people with type 2 diabetes. People with type 2 diabetes have a high risk for depression. Depression is a serious issue that leads to poor metabolic control and increased health care costs. However, little is known about the factors contrib…	[Yang, Juan] Hunan Tradit Chinese Med Coll, Nursing Fac, Zhuzhou 412012, Hunan, Peoples R China; [Li, Sijian] Wuhan Univ, HOPE Sch Nursing, Wuhan 430072, Peoples R China; [Zheng, Yanling] Shuiguohu Community Hlth Serv Ctr, Wuhan, Peoples R China	Yang, J (reprint author), Hunan Tradit Chinese Med Coll, Nursing Fac, Lusong Rd, Zhuzhou 412012, Hunan, Peoples R China.	wwyj210@126.com			HOPE School of Nursing, Wuhan University, China	The authors would like to thank all the staffs of five health service stations for their contributions to the data collection. We also deeply acknowledge all the participants of this study. This study was funded by the Research Grant from the HOPE School of Nursing, Wuhan University, China.		51	12	12	WILEY-BLACKWELL PUBLISHING, INC	MALDEN	COMMERCE PLACE, 350 MAIN ST, MALDEN 02148, MA USA	0962-1067			J CLIN NURS	J. Clin. Nurs.	MAY	2009	18	9					1295
J	Zang, YL; Chung, LYF; Wong, TKS				Zang, Yu-Li; Chung, Loretta Y. F.; Wong, Thomas K. S.			Chinese female nurses' perceptions of male genitalia-related care - Part 1	JOURNAL OF CLINICAL NURSING			English	Article						China; culture; gender; male patient; nurses; nursing	MENS HEALTH; PERSPECTIVE; EXPERIENCES; MASCULINITY; INTIMACY; ACCOUNTS; GENDER	To explore Chinese female nurses' experiences of male genitalia-related care. Male patients who require male genitalia-related care may have psychosocial and sexual concerns and needs. Nurses' attitudes and conduct in the provision of male genitalia-related care, if negative, may obviate meeting these needs. Previous research indicates that limited studies have been conducted focusing on nurses' …	[Zang, Yu-Li] Shandong Univ, Sch Nursing, Clin Nursing Sect, Jinan 250100, Shandong, Peoples R China; [Chung, Loretta Y. F.] Hong Kong Polytech Univ, Sch Nursing, Kowloon, Hong Kong, Peoples R China; [Wong, Thomas K. S.] Hong Kong Polytech Univ, Fac Hlth & Social Sci, Sch Nursing, Kowloon, Hong Kong, Peoples R China	Zang, YL (reprint author), Shandong Univ, Sch Nursing, Clin Nursing Sect, Jinan 250100, Shandong, Peoples R China.	yulizh@sdu.edu.cn						57	7	8	WILEY-BLACKWELL PUBLISHING, INC	MALDEN	COMMERCE PLACE, 350 MAIN ST, MALDEN 02148, MA USA	0962-1067			J CLIN NURS	J. Clin. Nurs.	MAR	2009	18	6					817
J	Zang, YL; Chung, LYF; Wong, TKS; Chan, MF				Zang, Yu-Li; Chung, Loretta Y. F.; Wong, Thomas K. S.; Chan, Moon Fai			Chinese female nurses' perceptions of male genitalia-related care - Part 2	JOURNAL OF CLINICAL NURSING			English	Article						China; culture; male genitalia; nurses; nursing; survey	BENIGN PROSTATIC HYPERPLASIA; URINARY-INCONTINENCE; SEXUAL DYSFUNCTION; CANCER; COUNTRIES; EXPERIENCES; POPULATION; PREVALENCE; PRIVACY; PEOPLE	This study was designed to investigate Chinese female nurses' perceptions of certain male genitalia-related care and the influence of their demography and experiences on their perceptions. Several physical conditions, in which male genitalia-related care is required, have been found to have considerable negative impact on male patients, leading to decreased quality of life and psychosocial and se…	[Zang, Yu-Li] Shandong Univ, Clin Nirsing Sect, Jinan 250100, Peoples R China; [Wong, Thomas K. S.] Hong Kong Polytech Univ, Sch Nursing, Fac Hlth & Social Sci, Kowloon, Hong Kong, Peoples R China	Zang, YL (reprint author), Shandong Univ, Clin Nirsing Sect, Jinan 250100, Peoples R China.	yulizh@sdu.edu.cn						53	4	4	WILEY-BLACKWELL PUBLISHING, INC	MALDEN	COMMERCE PLACE, 350 MAIN ST, MALDEN 02148, MA USA	0962-1067			J CLIN NURS	J. Clin. Nurs.	MAR	2009	18	6					826
J	Wang, KF; Zhang, B; Li, CY; Wang, C				Wang, Kefang; Zhang, Bing; Li, Chunyan; Wang, Chen			Qualitative analysis of patients' intensive care experience during mechanical ventilation	JOURNAL OF CLINICAL NURSING			English	Article						China; intensive care; mechanical ventilation; nurses; nursing; patients	UNIT; IMPLEMENTATION	To understand patients' intensive care experience while receiving mechanical ventilation in intensive care units. The mechanically ventilated patient's experience in the intensive care unit is unique. Notably lacking are international studies on patients' experience, particularly those living in Asia. A better understanding of patients' experience is needed for nurses to develop approaches to tak…	[Wang, Kefang; Zhang, Bing] Shandong Univ, Sch Nursing, Jinan 250100, Peoples R China; [Li, Chunyan] Beijing Chaoyang Hosp, Dept Nursing, Beijing, Peoples R China; [Wang, Chen] Beijing Chaoyang Hosp, Beijing Inst Resp Med, Beijing, Peoples R China	Wang, KF (reprint author), Shandong Univ, Sch Nursing, Jinan 250100, Peoples R China.	wangkf@sdu.edu.cn	siqueiros, carla/C-4994-2008					40	6	6	WILEY-BLACKWELL PUBLISHING, INC	MALDEN	COMMERCE PLACE, 350 MAIN ST, MALDEN 02148, MA USA	0962-1067			J CLIN NURS	J. Clin. Nurs.	JAN	2009	18	2					183
J	Chen, J; Li, JM; Yang, R; Zhao, LH; Feng, L; Chen, YJ; Zhou, D				Chen, Jing; Li, Jin-Mei; Yang, Rong; Zhao, Li-Hong; Feng, Ling; Chen, Yi-Juan; Zhou, Dong			ADMINISTRATION OF NURSING SERVICES IN A NEWLY BUILT TRAUMATIC INFECTION WARD AFTER AN 8.0-MAGNITUDE EARTHQUAKE IN WENCHUAN	JOURNAL OF EMERGENCY NURSING			English	Article									[Chen, Yi-Juan] Sichuan Univ, W China Hosp, Dept Neurol, Dept Nursing, Chengdu, Peoples R China	Zhou, D (reprint author), 37th Guoxuexiang Rd, Chengdu 610041, Peoples R China.	zhoudong66@yahoo.de						7	0	0	ELSEVIER SCIENCE INC	NEW YORK	360 PARK AVE SOUTH, NEW YORK, NY 10010-1710 USA	0099-1767			J EMERG NURS	J. Emerg. Nurs.	NOV	2009	35	6					532
J	Li, CY; Lee, O; Shin, GS; Li, XW				Li Chun Yu; Lee, Ogcheol; Shin, Gi Soo; Li Xian Wen			Health Literacy and Health Status of Korean-Chinese Elderly People living in Yanbian, China	JOURNAL OF KOREAN ACADEMY OF NURSING			Korean	Article						Health literacy; Health status; Elderly		Purpose: This descriptive study was done to identify the relationship between health literacy and health status and to provide basic data for developing nursing interventions for Korean-Chinese elders living in Yanbian, China. Methods: For data collection, intentional sampling of 300 elders was used. The questionnaire was composed of 5 items based on "Ministry of Health, the People's Republic of …	[Li Chun Yu; Li Xian Wen] Yanbian Univ, Coll Nursing, Yanji 133000, Jilin Prov, Peoples R China; [Lee, Ogcheol; Shin, Gi Soo] Red Cross Coll Nursing, Seoul, South Korea	Li, CY (reprint author), Yanbian Univ, Coll Nursing, 39 Jiankang Rd, Yanji 133000, Jilin Prov, Peoples R China.	yjlco@yahoo.com.cn						24	1	3	KOREAN SOC NURSING SCIENCE	SEOUL	KOREA SCIENCE & TECHNOL CTR, 635-4 YEOKSAM-DONG, KANGNAM-GU,, SEOUL, 135-703, SOUTH KOREA	2005-3673			J KOREAN ACAD NURS	J. Korean Acad. Nurs.	JUN	2009	39	3					386
J	Liu, YL; Kalisch, BJ; Zhang, L; Xu, J				Liu, Yilan; Kalisch, Beatrice J.; Zhang, Liang; Xu, Juan			Perception of Safety Culture by Nurses in Hospitals in China	JOURNAL OF NURSING CARE QUALITY			English	Article						China; error reporting; nursing quality; patient safety; safety culture	PATIENT SAFETY; ERROR; CLIMATE; CARE	The safety Culture in hospitals in China was investigated using a self-designed questionnaire. A convenience sample of 217 registered nurses responded positively in the areas of the safety of shift change processes, hospital and nursing leadership attention to patient safety, and staff cooperation, among others. However, a punitive safety culture was identified, and registered nurses reported a l…	[Kalisch, Beatrice J.] Univ Michigan, Sch Nursing, Ann Arbor, MI 48109 USA; [Liu, Yilan; Zhang, Liang] Huazhong Univ Sci & Technol, Tongji Med Coll, Coll Med & Hlth Management, Wuhan 430030, Peoples R China; [Liu, Yilan; Xu, Juan] Huazhong Univ Sci & Technol, Union Hosp, Tongji Med Coll, Wuhan 430030, Peoples R China	Zhang, L (reprint author), Huazhong Univ Sci & Technol, Tongji Med Coll, Coll Med & Hlth Management, 13 Hongkong Rd, Wuhan 430030, Peoples R China.	zhangliang@mails.tjmu.edu.cn						24	9	10	LIPPINCOTT WILLIAMS & WILKINS	PHILADELPHIA	530 WALNUT ST, PHILADELPHIA, PA 19106-3621 USA	1057-3631			J NURS CARE QUAL	J. Nurs. Care Qual.	JAN-MAR	2009	24	1					63
J	Li, L; Herr, K; Chen, PY				Li, Li; Herr, Keela; Chen, Pingyan			Postoperative Pain Assessment With Three Intensity Scales in Chinese Elders	JOURNAL OF NURSING SCHOLARSHIP			English	Article						Postoperative pain; pain intensity; assessment; measurement; Faces Pain Scale Revised; numeric rating scale; pain thermometer; Chinese adults; elderly	OLDER SURGICAL-PATIENTS; PSYCHOMETRIC PROPERTIES; ADULTS; YOUNGER; IMPACT; MANAGEMENT; RELIABILITY; THERMOMETER; PREFERENCE; DEMENTIA	Purpose: To evaluate the reliability and validity of the Faces Pain Scale Revised (FPS-R), the Numeric Rating Scale (NRS), and the Iowa Pain Thermometer (IPT) for pain assessment in Chinese elders who have had surgery. Design: A descriptive correlational design with repeated measures was used. A convenience sample of 180 Chinese elders (age range 65 to 95 years) undergoing scheduled Surgery at a …	[Li, Li] So Med Univ, Dept Nursing, Zhujiang Hosp, Guangzhou 510282, Guangdong, Peoples R China; [Herr, Keela] Univ Iowa, Coll Nursing, Iowa City, IA 52242 USA; [Chen, Pingyan] So Med Univ, Dept Biostat, Sch Publ Hlth & Trop Med, Guangzhou 510282, Guangdong, Peoples R China	Li, L (reprint author), So Med Univ, Dept Nursing, Zhujiang Hosp, 253 Gongye Rd, Guangzhou 510282, Guangdong, Peoples R China.	lli1@smu.edu.cn			Sigma Theta Tau International Small Research Grant Award	This Study was supported by a Sigma Theta Tau International Small Research Grant Award. We sincerely thank Dr. Rui Xu, Mr. Xibing Yang, Ms. Lingxiao Wang, Ms. Hongchao Ma, Ms. Li Guo, Ms. Fang Tang, Ms. Xiaowen Guo, and MS. Liying Ou for their kind assistance with data collection.		41	14	17	WILEY-BLACKWELL	HOBOKEN	111 RIVER ST, HOBOKEN 07030-5774, NJ USA	1527-6546	1547-5069		J NURS SCHOLARSHIP	J. Nurs. Scholarsh.		2009	41	3					241
J	Yang, M; Li, LJ; Zhu, HL; Alexander, IM; Liu, S; Zhou, W; Ren, XH				Yang, Min; Li, Lingjiang; Zhu, Haili; Alexander, Ivy M.; Liu, Shan; Zhou, Wei; Ren, Xiaohong			Music Therapy To Relieve Anxiety In Pregnant Women On Bedrest: A Randomized, Controlled Trial	MCN-THE AMERICAN JOURNAL OF MATERNAL-CHILD NURSING			English	Article						Music therapy; High-risk pregnancy; Bedrest; Antepartal; Chinese	HIGH-RISK PREGNANCIES; BED REST; RELAXATION; SYMPTOMS; PAIN	Purpose: To explore the effect of music therapy on anxiety alleviation for antepartal women on bedrest in China. Design and Methods: One hundred and twenty patients recruited from one tertiary hospital in Changsha city, China were enrolled in a randomized controlled trial. Women in the experimental group received music therapy for 30 minutes on 3 consecutive days. Usual care participants had a 30…	[Yang, Min; Li, Lingjiang] Cent S Univ, Mental Hlth Inst, Xiangya Hosp 2, Changsha, Hunan, Peoples R China; [Zhu, Haili] Changsha Social Work Coll, Rehabil Dept, Changsha, Hunan, Peoples R China; [Alexander, Ivy M.] Yale Univ, New Haven, CT USA; [Liu, Shan] Chinese Univ Hong Kong, Sch Nursing, Shatin, Hong Kong, Peoples R China; [Zhou, Wei; Ren, Xiaohong] Cent S Univ, Sch Nursing, Changsha, Hunan…	Yang, M (reprint author), Cent S Univ, Mental Hlth Inst, Xiangya Hosp 2, Changsha, Hunan, Peoples R China.	yangmin426@yahoo.com.cn						32	6	6	LIPPINCOTT WILLIAMS & WILKINS	PHILADELPHIA	530 WALNUT ST, PHILADELPHIA, PA 19106-3621 USA	0361-929X			MCN-AM J MATERN-CHIL	MCN-Am. J. Matern.-Child Nurs.	SEP-OCT	2009	34	5					316
J	Cheung, NF; Mander, R; Wang, XL; Fu, W; Zhu, JH				Cheung, Ngai Fen; Mander, Rosemary; Wang, Xiaoli; Fu, Wei; Zhu, Junghong			Chinese midwives' views on a proposed midwife-led normal birth unit	MIDWIFERY			English	Article						Chinese midwives; Normal birth unit; Midwife led; Survey	OUTCOMES	Objective: to investigate and assess Chinese midwives' views of their roles and ability to practice in a proposed midwife-led normal birth unit (MNBU). Design: a self-completed questionnaire supplemented with semi-structured telephone interviews. Memos, diaries, correspondence and comments of Chinese collaborators were also accessed. Setting: six hospitals in Hangzhou, the capital of Zhejiang pro…	[Cheung, Ngai Fen; Fu, Wei; Zhu, Junghong] Hangzhou Normal Univ, Coll Nursing, Hangzhou 310036, Zhejiang, Peoples R China; [Mander, Rosemary] Univ Edinburgh, Sch Hlth Social Sci, Edinburgh EH8 9AG, Midlothian, Scotland; [Wang, Xiaoli] Hangzhou First Peoples Hosp, Dept Nursing, Hangzhou 310006, Zhejiang, Peoples R China	Cheung, NF (reprint author), Hangzhou Normal Univ, Coll Nursing, 16 Xuelin Rd, Hangzhou 310036, Zhejiang, Peoples R China.	nf-cheung@tesco.net	Sandall, Jane/D-4146-2009	Sandall, Jane/0000-0003-2000-743X				49	9	11	ELSEVIER SCI LTD	OXFORD	THE BOULEVARD, LANGFORD LANE, KIDLINGTON, OXFORD OX5 1GB, OXON, ENGLAND	0266-6138			MIDWIFERY	Midwifery	DEC	2009	25	6					744
J	Strand, MA; Perry, J; Guo, JZ; Zhao, JP; Janes, C				Strand, Mark A.; Perry, Judith; Guo, Jinzhi; Zhao, Jinping; Janes, Craig			Doing the month: rickets and post-partum convalescence in rural China	MIDWIFERY			English	Article						Zuo yuezi; Rickets; China; Traditional Chinese medicine; Health beliefs	BONE-MINERAL CONTENT; VITAMIN-D-DEFICIENCY; INFANTS; CHILDREN; EXPOSURE; GROWTH; HEALTH; WOMEN; MILK	Objective: to analyse the health beliefs underlying the Chinese custom of 'doing the month', in particular mothers' perceptions of rickets. Design: a qualitative approach was used. Four focus group discussions were tape recorded. Translated transcripts were analysed and coded. Setting: Yuci District, rural Shanxi Province, China. Participants: eighteen young mothers with children aged between 12 …	[Strand, Mark A.] N Dakota State Univ, Fargo, ND USA; [Zhao, Jinping] Yuci Women & Childrens Hlth Ctr, Yuci, Shanxi, Peoples R China; [Janes, Craig] Simon Fraser Univ, Fac Hlth Sci, Burnaby, BC V5A 1S6, Canada	Strand, MA (reprint author), Care of Huayuan XJ, Erqu 2-408, Jinzhong 030600, Shanxi, Peoples R China.	MARKSTRAND3@aol.com			Nestle Foundation	The authors wish to thank those who diligently completed this project even in the face of SARS. This project was partially funded by the Nestle Foundation.		30	10	10	ELSEVIER SCI LTD	OXFORD	THE BOULEVARD, LANGFORD LANE, KIDLINGTON, OXFORD OX5 1GB, OXON, ENGLAND	0266-6138			MIDWIFERY	Midwifery	OCT	2009	25	5					588
J	Luo, Y; Wang, H				Luo, Yang; Wang, Honghong			Correlation research on psychological health impact on nursing students against stress, coping way and social support	NURSE EDUCATION TODAY			English	Article						Nursing students; Stress incidents; Coping style; Social support; Psychological condition		The purpose of this study was to explore the factors affecting nurse students' psychological status, and the interactions between mental symptoms and stressful factors, coping style and social support in their early clinical experiences. We assessed clinically 288 college nurse students during their first period by adopting College Seniors Stress Scale (CSSS), Trait Coping Style Questionnaire (TC…	[Luo, Yang; Wang, Honghong] Cent S Univ, Sch Nursing, Dept Clin Nursing, Changsha 410013, Hunan, Peoples R China	Luo, Y (reprint author), Cent S Univ, Sch Nursing, Dept Clin Nursing, 172 Tongzipo Rd, Changsha 410013, Hunan, Peoples R China.	LY603202@sina.com						5	17	22	CHURCHILL LIVINGSTONE	EDINBURGH	JOURNAL PRODUCTION DEPT, ROBERT STEVENSON HOUSE, 1-3 BAXTERS PLACE, LEITH WALK, EDINBURGH EH1 3AF, MIDLOTHIAN, SCOTLAND	0260-6917			NURS EDUC TODAY	Nurse Educ. Today	JAN	2009	29	1					5
J	Cai, CF; Zhou, ZK				Cai, Chunfeng; Zhou, Zongkui			Structural empowerment, job satisfaction, and turnover intention of Chinese clinical nurses	NURSING & HEALTH SCIENCES			English	Article						China; clinical nurses; job satisfaction; nurse retention; structural empowerment; turnover intention	MAGNET HOSPITAL CHARACTERISTICS; WORKPLACE EMPOWERMENT; ORGANIZATIONAL TRUST; WORK SATISFACTION; COMMITMENT; SETTINGS; BURNOUT; HEALTH; GUANXI; STRAIN	The purpose of this study was to examine the levels of workplace structural empowerment perceived by Chinese clinical nurses, as well as to identify the relationship between nurses' perceptions of empowerment and job satisfaction, and turnover intention. A total of 189 staff nurses from two hospitals in central China completed a self-administered questionnaire. The results indicated that these nu…	[Cai, Chunfeng] Wuhan Univ, HOPE Sch Nursing, Wuhan 430071, Peoples R China; [Cai, Chunfeng; Zhou, Zongkui] Cent China Normal Univ, Sch Psychol, Wuhan, Peoples R China	Cai, CF (reprint author), Wuhan Univ, HOPE Sch Nursing, Wuhan 430071, Peoples R China.	chunfengc01@yahoo.com.cn			Deborah Lindell, Assistant Professor of Nursing, Frances Payne Bolton School of Nursing, Case Western Reserve University, Cleveland, Ohio, USA	The authors would like to thank Deborah Lindell, Assistant Professor of Nursing, Frances Payne Bolton School of Nursing, Case Western Reserve University, Cleveland, Ohio, USA, for her excellent assistance.		35	13	16	WILEY-BLACKWELL PUBLISHING, INC	MALDEN	COMMERCE PLACE, 350 MAIN ST, MALDEN 02148, MA USA	1441-0745			NURS HEALTH SCI	Nurs. Health Sci.	DEC	2009	11	4					397
J	Xiao, ZB; Zhang, MB				Xiao Zhibo; Zhang Miaobo			Molecular Mechanism of Pulsed-Dye Laser in Treatment of Keloids: An In Vitro Study	ADVANCES IN SKIN & WOUND CARE			English	Article							HYPERTROPHIC SCARS; FIBROBLASTS; APOPTOSIS; GROWTH	OBJECTIVE: Clinical observations indicate that the irradiation of pulsed-dye laser (PDL) can inhibit keloid growth; however, the mechanism of this process is unknown. The aim of this study was to explore the molecular mechanism of the action of PDL on keloid fibroblasts. METHODS: Twenty patients with keloids were selected for this study. Fibroblasts were harvested from keloid tissue. Cell cycle d…	[Xiao Zhibo; Zhang Miaobo] Harbin Med Coll, Dept Plast & Cosmet Surg, Affiliated Hosp 2, Harbin, Heilongjiang Pr, Peoples R China	Xiao, ZB (reprint author), Harbin Med Coll, Dept Plast & Cosmet Surg, Affiliated Hosp 2, Harbin, Heilongjiang Pr, Peoples R China.							16	0	0	LIPPINCOTT WILLIAMS & WILKINS	PHILADELPHIA	530 WALNUT ST, PHILADELPHIA, PA 19106-3621 USA	1527-7941			ADV SKIN WOUND CARE	Adv. Skin Wound Care	JAN	2010	23	1					29
J	Zhang, X; Xu, W; Sun, J; Zhang, K				Zhang, X.; Xu, W.; Sun, J.; Zhang, K.			VEGF mRNA expression in jugulotympanic paraganglioma	EUROPEAN JOURNAL OF CANCER CARE			English	Article						jugulotympanic paraganglioma; vascular endothelial growth factor; hybridisation in situ; tumour; cell factor; pathology; angiogenesis		The vascular endothelial growth factor (VEGF) family are essential regulators of angiogenesis and vascular permeability. VEGF protein was found in the jugulotympanic paraganglioma, but it wasn't confirmed on mRNA level. Our aim of this study is the mRNA expression of VEGF in jugulotympanic paraganglioma. We chose six cases of primary jugulotympanic paraganglioma wax specimen by hybridisation in s…	[Zhang, X.; Xu, W.; Sun, J.] Anhui Med Univ, Anhui Prov Hosp, Dept ENT, Hefei 23001, Anhui, Peoples R China; [Zhang, K.] Anhui Med Univ, Dept ENT, Hefei Hosp 1, Hefei 23001, Anhui, Peoples R China	Xu, W (reprint author), Anhui Med Univ, Anhui Prov Hosp, Dept Otolaryngol Head & Neck Surg, Hefei 23001, Anhui, Peoples R China.	weiqingxu@yahoo.com.cn			Anhui Provincial Natural Science Foundation	Thanks to doctors Qiang Wu, Jingwu Sun and my friends who helped me on this experiment in the Department of Otolaryngology Head and Neck Surgery, Anhui Medical University Affiliated Anhui Provincial Hospital. The project was supported by Anhui Provincial Natural Science Foundation.		9	0	0	WILEY-BLACKWELL	MALDEN	COMMERCE PLACE, 350 MAIN ST, MALDEN 02148, MA USA	0961-5423			EUR J CANCER CARE	Eur. J. Cancer Care	NOV	2010	19	6					816
J	Chang, H; Xu, J; Mu, Q; Qin, C; Zhang, Z; Wu, T				Chang, H.; Xu, J.; Mu, Q.; Qin, C.; Zhang, Z.; Wu, T.			Occult hepatocellular carcinoma: a case report of a special icteric-type hepatoma and literature review	EUROPEAN JOURNAL OF CANCER CARE			English	Article						hepatocellular carcinoma; obstructive jaundice; bile duct thrombus; occult; review	OBSTRUCTIVE-JAUNDICE SECONDARY; BILE-DUCT THROMBI; TUMOR THROMBUS; MANAGEMENT; RESECTION	Hepatocellular carcinoma (HCC) presenting with obstructive jaundice due to bile duct tumour thrombi is classified as icteric-type hepatoma. This report describes a case of unusual icteric-type HCC with common bile duct thrombus, which is herein named 'occult HCC', as no detectable primary lesion in liver was defined pre-operatively and intra-operatively. A thrombectomy followed by a T biliary dra…	[Chang, H.; Xu, J.; Mu, Q.; Qin, C.; Zhang, Z.; Wu, T.] Shandong Univ, Dept Hepatobiliary & Pancreat Surg, Shandong Prov Hosp, Sch Med, Jinan 250021, Shandong, Peoples R China	Chang, H (reprint author), Shandong Univ, Dept Hepatobiliary & Pancreat Surg, Shandong Prov Hosp, Sch Med, Jinan 250021, Shandong, Peoples R China.	changh111@hotmail.com						18	1	1	WILEY-BLACKWELL	MALDEN	COMMERCE PLACE, 350 MAIN ST, MALDEN 02148, MA USA	0961-5423			EUR J CANCER CARE	Eur. J. Cancer Care	SEP	2010	19	5					690
J	Li, YG; Geng, X				Li, Y. G.; Geng, X.			A meta-analysis on the association of HER-2 overexpression with prognosis in human osteosarcoma	EUROPEAN JOURNAL OF CANCER CARE			English	Article						meta-analysis; osteosarcoma; HER-2; erbB2; neu; survival	LUNG-CANCER CELLS; ERBB2 EXPRESSION; POOR-PROGNOSIS; P-GLYCOPROTEIN; OVARIAN-CANCER; AMPLIFICATION; C-ERBB-2/NEU; ONCOGENE; GENE; METASTASIS	Various studies examining the relationship between HER-2 overexpression and clinical outcome in patients with osteosarcoma have yielded inconclusive results. The purpose of the current study was to evaluate the relation of HER-2 status with clinical outcome in osteosarcoma. We conducted a meta-analysis of five studies that evaluated the relation between HER-2 status and 2-year survival. DerSimoni…	[Li, Y. G.] Tianjin Med Univ, Canc Hosp, Dept Lab, Tianjin 300060, Peoples R China; [Geng, X.] Tianjin Med Univ, Res Ctr, Tianjin 300060, Peoples R China	Li, YG (reprint author), Tianjin Med Univ, Canc Hosp, Dept Lab, Tianjin 300060, Peoples R China.	kesaqi@163.com						20	9	10	WILEY-BLACKWELL	MALDEN	COMMERCE PLACE, 350 MAIN ST, MALDEN 02148, MA USA	0961-5423			EUR J CANCER CARE	Eur. J. Cancer Care	MAY	2010	19	3					313
J	Xu, WH; Zhou, CJ; Zhang, GF; Wang, HB; Wang, L; Guo, JQ				Xu, Weihua; Zhou, Chengjun; Zhang, Gangfeng; Wang, Hongbo; Wang, Li; Guo, Jianqiang			Repeating Gastric Biopsy for Accuracy of Gastric Lymphoma Diagnosis	GASTROENTEROLOGY NURSING			English	Article							B-CELL LYMPHOMA; TISSUE	Gastric lymphoma is characterized by a good prognosis with slow progression and a nonspecific appearance under the endoscope. A biopsy is performed for accurate diagnosis. For this study, endoscopy and biopsy specimens were analyzed retrospectively to investigate the rate of accurate diagnosis of gastric lymphoma in first-, second-, and third-round endoscopic and biopsy procedures and to understa…	[Xu, Weihua; Zhang, Gangfeng; Wang, Hongbo; Wang, Li; Guo, Jianqiang] Shandong Univ, Dept Gastroenterol, Hosp 2, Jinan 250033, Shandong, Peoples R China; [Zhou, Chengjun] Shandong Univ, Dept Pathol Gastroenterol, Hosp 2, Jinan 250033, Shandong, Peoples R China	Guo, JQ (reprint author), Shandong Univ, Dept Gastroenterol, Hosp 2, 247 Beiyuan St, Jinan 250033, Shandong, Peoples R China.	guo20000@gmail.com						4	1	2	LIPPINCOTT WILLIAMS & WILKINS	PHILADELPHIA	530 WALNUT ST, PHILADELPHIA, PA 19106-3621 USA	1042-895X			GASTROENTEROL NURS	Gastroenterol. Nurs.	JUL-AUG	2010	33	4					313
J	Lau, Y; Wang, YQ; Yin, L; Chan, KS; Guo, XJ				Lau, Ying; Wang, Yuqiong; Yin, Lei; Chan, Kin Sun; Guo, Xiujing			Validation of the Mainland Chinese version of the Edinburgh Postnatal Depression Scale in Chengdu mothers	INTERNATIONAL JOURNAL OF NURSING STUDIES			English	Article						Mainland Chinese version of the EPDS; Factor analysis; ROC analysis; Sensitivity; Specificity	RANDOMIZED CONTROLLED-TRIAL; SF-12 HEALTH SURVEY; QUALITY-OF-LIFE; POSTPARTUM DEPRESSION; PSYCHOMETRIC PROPERTIES; TAIWANESE WOMEN; PRIMARY-CARE; RISK-FACTORS; HONG-KONG; INVENTORY	Background: The Mainland Chinese version of the Edinburgh Postnatal Depression Scale (EPDS) has been validated among antenatal women, subsequent validation among postnatal women is necessary. Objectives: This study investigated the prevalence of postnatal depression and the psychometric characteristics of the Mainland Chinese version of the EPDS among postnatal women. Design: Two studies were use…	[Wang, Yuqiong; Guo, Xiujing] Sichuan Univ, W China Women & Children Univ Hosp 2, Dept Nursing, Chengdu, Sichuan, Peoples R China; [Chan, Kin Sun] Univ Macao, Fac Humanities & Social Sci, Taipa, Peoples R China	Wang, YQ (reprint author), 20,Sect 3, Chengdu 610041, Sichuan, Peoples R China.	yuqiong_w@126.com						89	12	12	PERGAMON-ELSEVIER SCIENCE LTD	OXFORD	THE BOULEVARD, LANGFORD LANE, KIDLINGTON, OXFORD OX5 1GB, ENGLAND	0020-7489			INT J NURS STUD	Int. J. Nurs. Stud.	SEP	2010	47	9					1139
J	Yang, XL; Li, HH; Hong, MH; Kao, HSR				Yang, Xue-Ling; Li, Huan-Huan; Hong, Ming-Huang; Kao, Henry S. R.			The effects of Chinese calligraphy handwriting and relaxation training in Chinese Nasopharyngeal Carcinoma patients: A randomized controlled trial	INTERNATIONAL JOURNAL OF NURSING STUDIES			English	Article						Calligraphy; Nasopharyngeal Carcinoma; Psychological intervention; Relaxation training	QUALITY-OF-LIFE; CANCER-PATIENTS; GUIDED IMAGERY; ART-THERAPY; BREAST-CANCER; RADIATION-THERAPY; SYMPTOM DISTRESS; STOMA SURGERY; CHEMOTHERAPY; EFFICACY	Background: Chinese calligraphy handwriting is the practice of traditional Chinese brush writing, researches found calligraphy had therapeutic effects on certain diseases, some authors argued that calligraphy might have relaxation effect. Objectives: This study was to compare the effects of calligraphy handwriting with those of progressive muscle relaxation and imagery training in Chinese Nasopha…	[Yang, Xue-Ling; Li, Huan-Huan] Sun Yat Sen Univ, Dept Psychol, Guangzhou 510275, Guangdong, Peoples R China; [Yang, Xue-Ling] So Med Univ, Dept Psychol, Guangzhou, Guangdong, Peoples R China; [Hong, Ming-Huang] Sun Yat Sen Univ, Ctr Canc, Guangzhou 510275, Guangdong, Peoples R China; [Kao, Henry S. R.] Univ Hong Kong, Hong Kong, Hong Kong, Peoples R China	Li, HH (reprint author), Sun Yat Sen Univ, Dept Psychol, Xin Gang Xi Rd 135, Guangzhou 510275, Guangdong, Peoples R China.	lihh@mail.sysu.edu.cn			Cancer Centre, Sun Yat-Sen University, China	This study was supported by the staff in Cancer Centre, Sun Yat-Sen University, China. Heartfelt thanks are given to all the men and women who participated in the study, whose enthusiasm continues to inspire us. Special thanks are given to Dr Ruth McCorkle, Yale University School of Nursing, who provided the valuable user's manual for the Symptom Distress Scale.		52	4	4	PERGAMON-ELSEVIER SCIENCE LTD	OXFORD	THE BOULEVARD, LANGFORD LANE, KIDLINGTON, OXFORD OX5 1GB, ENGLAND	0020-7489			INT J NURS STUD	Int. J. Nurs. Stud.	MAY	2010	47	5					550
J	Zheng, J; You, LM; Lou, TQ; Chen, NC; Lai, DY; Liang, YY; Li, YN; Gu, YM; Lv, SF; Zhai, CQ				Zheng, Jing; You, Li-Ming; Lou, Tan-Qi; Chen, Nian-Chang; Lai, De-Yuan; Liang, Yan-Yi; Li, Ying-Na; Gu, Ying-Ming; Lv, Shao-Fen; Zhai, Cui-Qiu			Development and psychometric evaluation of the Dialysis patient-perceived Exercise Benefits and Barriers Scale	INTERNATIONAL JOURNAL OF NURSING STUDIES			English	Article						Scale development; Dialysis; Exercise	STAGE RENAL-DISEASE; QUALITY-OF-LIFE; PHYSICAL-ACTIVITY LEVELS; CHRONIC KIDNEY-DISEASE; HEMODIALYSIS-PATIENTS; REHABILITATION PROGRAM; IMPROVES; QUESTIONNAIRES; CAPACITY; EFFICACY	Background: Perceptions of exercise benefits and barriers affect exercise behavior. Because of the clinical course and treatment, dialysis patients differ from the general population in their perceptions of exercise benefits and barriers, especially the latter. At present, no valid instruments for assessing perceived exercise benefits and barriers in dialysis patients are available. Objectives: O…	[Zheng, Jing; You, Li-Ming] Sun Yat Sen Univ, Sch Nursing, Guangzhou 510089, Guangdong, Peoples R China; [Lou, Tan-Qi; Chen, Nian-Chang] Sun Yat Sen Univ, Dept Nephrol, Affiliated Hosp 3, Guangzhou, Guangdong, Peoples R China; [Lai, De-Yuan; Liang, Yan-Yi] Sun Yat Sen Univ, Dept Nephrol, Affiliated Hosp 2, Guangzhou, Guangdong, Peoples R China; [Li, Ying-Na] Guangzhou First Municipal Peoples Hosp…	You, LM (reprint author), Sun Yat Sen Univ, Sch Nursing, 74 Zhongshan Rd 2, Guangzhou 510089, Guangdong, Peoples R China.	youlm@mail.sysu.edu.cn			Guangdong Science & Technology Department, China [2006B36004018]	This research was supported by a grant from Guangdong Science & Technology Department, China (No. 2006B36004018). The authors thank the patients for their participating in this study. We also express our gratitude to Dr. Karen R. Sechrist and Dr. James F. Sallis for their generously support for us to use EBBS and PAR.		78	7	8	PERGAMON-ELSEVIER SCIENCE LTD	OXFORD	THE BOULEVARD, LANGFORD LANE, KIDLINGTON, OXFORD OX5 1GB, ENGLAND	0020-7489			INT J NURS STUD	Int. J. Nurs. Stud.	FEB	2010	47	2					166
J	Chen, LL; Liu, YL				Chen, L. L.; Liu, Y. L.			Presence of nursing information on hospital websites in five countries: a review	INTERNATIONAL NURSING REVIEW			English	Review						Hospital Website; Nursing Information; World Wide Web	WEB SITES	Aim: The aims of this study were to (1) examine the presence of nursing information on 50 hospital websites across five countries; (2) describe the accessibility, range and depth of nursing information provided; and (3) compare the characteristics of nursing web information across the countries. Background: Providing information on hospital website is an increasingly popular strategy for marketin…	[Chen, L. L.; Liu, Y. L.] Huazhong Univ Sci & Technol, Union Hosp, Tongji Med Coll, Dept Nursing, Wuhan 430022, Peoples R China	Liu, YL (reprint author), Huazhong Univ Sci & Technol, Union Hosp, Tongji Med Coll, Dept Nursing, 1277 Jiefang Ave, Wuhan 430022, Peoples R China.	yilanl@yahoo.com						19	0	0	WILEY-BLACKWELL	MALDEN	COMMERCE PLACE, 350 MAIN ST, MALDEN 02148, MA USA	0020-8132			INT NURS REV	Int. Nurs. Rev.	JUN	2010	57	2					168
J	Fu, W; Bao, J; Meng, J				Fu, W.; Bao, J.; Meng, J.			Development of community nursing in Zhejiang Province, China: a report of the driving measures	INTERNATIONAL NURSING REVIEW			English	Article						Administration; China; Community Nursing; Education; Primary Health Care; Regulation		Background: Community nursing is playing an important role in health care worldwide. Methods: We reviewed recent developments in community nursing in the Zhejiang province of China and reported that the locally tailored practical guidelines, education programmes and management models are the driving measures for promoting local community nursing. Results: In 2008, Zhejiang had 1200 community prim…	[Fu, W.] Hangzhou Normal Univ, Sch Nursing, Hangzhou 310036, Zhejiang, Peoples R China; [Bao, J.] Zhejiang Univ, City Coll, Dept Nursing, Hangzhou 310003, Zhejiang, Peoples R China; [Meng, J.] Community Hlth Care Serv Ctr Kaixuan Neighborhood, Hangzhou, Zhejiang, Peoples R China	Fu, W (reprint author), Hangzhou Normal Univ, Sch Nursing, Hangzhou 310036, Zhejiang, Peoples R China.	fuwei@hznu.edu.cn						13	0	0	WILEY-BLACKWELL	MALDEN	COMMERCE PLACE, 350 MAIN ST, MALDEN 02148, MA USA	0020-8132			INT NURS REV	Int. Nurs. Rev.	JUN	2010	57	2					265
J	Yang, TZ; Abdullah, ASM; Wu, JQ; Beard, J; Zheng, JZ; Rockett, IRH				Yang, Tingzhong; Abdullah, Abu S. M.; Wu, Junqing; Beard, Jennifer; Zheng, Jianzhong; Rockett, Ian R. H.			Nicotine Dependence among Rural Chinese Males	JOURNAL OF ADDICTIONS NURSING			English	Article						Smoking Cessation; Chinese Males; Rural; Fagerstrom Test for Nicotine Dependence (CFTND); Heavy Smoking Index (HSI)	FAGERSTROM TOLERANCE QUESTIONNAIRE; ADULT-POPULATION SAMPLES; EMERGING TOBACCO HAZARDS; SMOKING INDEX; SMOKERS; CLINICIAN; HEAVINESS; CESSATION; MORTALITY; FTND	The objective of this study was to evaluate the reliability and validity of the Chinese mainland version of the Fagerstrom Test for Nicotine Dependence (CFTND), compare the Heavy Smoking Index (HSI) to the CFTND, and identify determinants of nicotine dependence among rural Chinese males. A sample of 1759 males ages 15 years and older was drawn from two regions in rural China using a multi-stage s…	[Yang, Tingzhong] Zhejiang Univ, Sch Med, Ctr Tobacco Control Res, Hangzhou 310058, Zhejiang, Peoples R China; [Abdullah, Abu S. M.; Beard, Jennifer] Boston Univ, Sch Publ Hlth, Dept Int Hlth, Boston, MA USA; [Wu, Junqing] WHO Collaborating Ctr Human Res Reprod Hlth, Shanghai Inst Planned Parenthood Res, Shanghai 200032, Peoples R China; [Zheng, Jianzhong] Shanxi Med Univ, Sch Publ Hlth Coll, Tai…	Yang, TZ (reprint author), Zhejiang Univ, Sch Med, Ctr Tobacco Control Res, Hangzhou 310058, Zhejiang, Peoples R China.	ytingzhongyang@yahoo.com						27	4	4	TAYLOR & FRANCIS INC	PHILADELPHIA	325 CHESTNUT ST, SUITE 800, PHILADELPHIA, PA 19106 USA	1088-4602			J ADDICT NURS	J. Addict. Nurs.	JUN	2010	21	42038					123
J	Wang, KF; Palmer, MH				Wang, Kefang; Palmer, Mary H.			Women's toileting behaviour related to urinary elimination: concept analysis	JOURNAL OF ADVANCED NURSING			English	Article						concept analysis; Johnson's behavioural system model; nursing; toileting behaviour; urinary elimination; women	STANDARDIZATION SUB-COMMITTEE; TRACT SYMPTOMS; BLADDER DYSFUNCTION; OVERACTIVE BLADDER; CONTINENCE SOCIETY; INCONTINENT WOMEN; RISK-FACTORS; PREVALENCE; POPULATION; MICTURITION	P>Title. Women's toileting behaviour related to urinary elimination: concept analysis. Aim. This paper is a report of analysis of the concept of women's toileting behaviour related to urinary elimination. Background. Behaviours related to emptying urine from the bladder can contribute to bladder health problems. Evidence exists that clinical interventions focusing on specific behaviours that prom…	[Wang, Kefang] Shandong Univ, Sch Nursing, Jinan 250100, Shandong, Peoples R China; [Palmer, Mary H.] Univ N Carolina, Aging Sch Nursing, Chapel Hill, NC USA	Wang, KF (reprint author), Shandong Univ, Sch Nursing, Jinan 250100, Shandong, Peoples R China.	wangkf@sdu.edu.cn						63	10	12	WILEY-BLACKWELL	MALDEN	COMMERCE PLACE, 350 MAIN ST, MALDEN 02148, MA USA	0309-2402			J ADV NURS	J. Adv. Nurs.	AUG	2010	66	8					1874
J	Wu, H; Chi, TS; Chen, L; Wang, L; Jin, YP				Wu, Hui; Chi, Tie-Shuang; Chen, Li; Wang, Lie; Jin, Ya-Ping			Occupational stress among hospital nurses: cross-sectional survey	JOURNAL OF ADVANCED NURSING			English	Article						China; cross-sectional survey; nurses; occupational stress; Occupational Stress Inventory-Revised Edition	EFFORT-REWARD-IMBALANCE; QUESTIONNAIRE SURVEY; SOCIAL SUPPORT; WORK STRESS; HEALTH; TEACHERS; BURNOUT; CATECHOLAMINES; ASSOCIATIONS; TAIWAN	P>Aim. This paper is a report of a study conducted to explore factors associated with occupational stress among female hospital nurses in China. Background. Nursing is a highly stressful occupation, and high levels of occupational stress are believed to affect the physical and mental health of nurses. Occupational stress among nurses is the result of exposure to a combination of working environme…	[Jin, Ya-Ping] China Med Univ, Sch Publ Hlth, Dept Occupat Med, Shenyang, Liaoning, Peoples R China; [Wu, Hui; Chi, Tie-Shuang; Chen, Li; Wang, Lie] China Med Univ, Dept Social Med, Sch Publ Hlth, Shenyang, Liaoning, Peoples R China	Jin, YP (reprint author), China Med Univ, Sch Publ Hlth, Dept Occupat Med, Shenyang, Liaoning, Peoples R China.	jinyp@mail.cmu.edu.cn						37	21	27	WILEY-BLACKWELL PUBLISHING, INC	MALDEN	COMMERCE PLACE, 350 MAIN ST, MALDEN 02148, MA USA	0309-2402			J ADV NURS	J. Adv. Nurs.	MAR	2010	66	3					627
J	Guo, J; Dixon, JK; Whittemore, R; He, GP				Guo, Jia; Dixon, Jane K.; Whittemore, Robin; He, Guo-Ping			Psychometric testing of the Health Quotient questionnaire: a measure of self-reported holistic health	JOURNAL OF ADVANCED NURSING			English	Article						Chinese; Health Quotient questionnaire; holistic health; nursing; psychometric testing; undergraduates	CONTENT VALIDITY; STUDENTS	P>Aim. This paper is a report of a test of the psychometric properties of the Health Quotient questionnaire. Background. The Health Quotient questionnaire is an existing self-reported holistic health measure developed by integrating Western and Eastern perspectives, but limited psychometric properties have been reported. Methods. Content validity was estimated by five experts. A pilot study allow…	[Guo, Jia; He, Guo-Ping] Cent S Univ, Sch Nursing, Changsha, Hunan, Peoples R China; [Dixon, Jane K.; Whittemore, Robin] Yale Univ, Sch Nursing, New Haven, CT 06536 USA	He, GP (reprint author), Cent S Univ, Sch Nursing, Changsha, Hunan, Peoples R China.	hgpcsu@yahoo.com.cn			Central South University, China [2340-77322]	This work was funded by a grant for PhD students from Central South University, China; contract grant number: 2340-77322.		40	0	0	WILEY-BLACKWELL	MALDEN	COMMERCE PLACE, 350 MAIN ST, MALDEN 02148, MA USA	0309-2402			J ADV NURS	J. Adv. Nurs.	MAR	2010	66	3					653
J	Ning, CY; Chen, WX				Ning Chuanyi; Chen Wuxian			Summaries of Nursing Care-Related Systematic Reviews From the Cochrane Library Exercise-Based Rehabilitation for Coronary Heart Disease	JOURNAL OF CARDIOVASCULAR NURSING			English	Review									[Chen Wuxian] Guangxi Med Univ, Inst Cardiovasc Dis, Guangxi, Peoples R China	Chen, WX (reprint author), First Affiliated Hosp, Inst Cardiovasc Dis, 22 Shuangyong Rd, Nanning 530021, Peoples R China.							1	0	0	LIPPINCOTT WILLIAMS & WILKINS	PHILADELPHIA	530 WALNUT ST, PHILADELPHIA, PA 19106-3621 USA	0889-4655			J CARDIOVASC NURS	J. Cardiovasc. Nurs.	SEP-OCT	2010	25	5					379
J	Chen, WT; Han, M				Chen, Wei-Ti; Han, Mei			Knowledge, attitudes, perceived vulnerability of Chinese nurses and their preferences for caring for HIV-positive individuals: a cross-sectional survey	JOURNAL OF CLINICAL NURSING			English	Article						attitude; caring; China; HIV; AIDS; knowledge; nurses; perceived vulnerability	HEALTH BELIEF MODEL; OCCUPATIONAL-EXPOSURE; MAINLAND CHINA; INTERNET USE; HIV/AIDS; STUDENTS; RISK; PERCEPTIONS; BEHAVIORS; CARE	Aims. The study was to assess HIV/AIDS knowledge, attitudes and perceived vulnerability with potential factors. Background. HIV/AIDS is a public health catastrophe in China. Nurses are expected to care for nurture, comfort and advocate for all patients regardless of their condition. However, in the area of HIV/AIDS, nurses suffer as a result of expectations put on them by their professional roles…	[Han, Mei] Jiamusi Univ, Affiliated Hosp 1, Sci Res Dept, Jiamusi 154002, Heilongjiang, Peoples R China; [Chen, Wei-Ti] Univ Washington, Sch Nursing, Dept Family & Child Nursing, Seattle, WA 98195 USA	Han, M (reprint author), Jiamusi Univ, Affiliated Hosp 1, Sci Res Dept, Jiamusi 154002, Heilongjiang, Peoples R China.	hanmei_1999@yahoo.com			Sigma Theta Tau International, Alpha Eta Chapter	The authors acknowledge Sigma Theta Tau International, Alpha Eta Chapter for supporting this research. Also, the authors appreciate Dr William L Holzemer for reviewing and guiding this manuscript.		42	1	2	WILEY-BLACKWELL	MALDEN	COMMERCE PLACE, 350 MAIN ST, MALDEN 02148, MA USA	0962-1067			J CLIN NURS	J. Clin. Nurs.	NOV	2010	19	21-22					3227
J	Zhou, LR; Lin, Z; Lin, L; Wang, MF; Zhang, HJ				Zhou, Lirong; Lin, Zheng; Lin, Lin; Wang, Meifeng; Zhang, Hongjie			Functional constipation: implications for nursing interventions	JOURNAL OF CLINICAL NURSING			English	Article						anorectal function; functional constipation; psychological condition; psychological nursing intervention	PREVALENCE; DISORDERS	Aims. To verify the correlation between anorectal function and psychological conditions of depression/anxiety in patients with functional constipation. The aim of this study is to explore why people with depression/anxiety have higher incidence of functional constipation and recommend innovative interventions to advance patient care of functional constipation. Design. A prospective correlational …	[Zhou, Lirong; Lin, Zheng] Nanjing Med Univ, Sch Nursing, Nanjing 210029, Peoples R China; [Lin, Lin; Zhang, Hongjie] Nanjing Med Univ, Affiliated Hosp 1, Dept Gastroenterol, Nanjing, Peoples R China; [Wang, Meifeng] Nanjing Med Univ, Affiliated Hosp 1, Gastrointestinal Motil Ctr, Nanjing, Peoples R China	Lin, Z (reprint author), Nanjing Med Univ, Sch Nursing, 140 Hanzhong Rd, Nanjing 210029, Peoples R China.	linzheng100@163.com						18	2	3	WILEY-BLACKWELL	MALDEN	COMMERCE PLACE, 350 MAIN ST, MALDEN 02148, MA USA	0962-1067			J CLIN NURS	J. Clin. Nurs.	JUL	2010	19	13-14					1838
J	Shen, CZ; Pang, SMC; Kwong, EWY; Cheng, ZQ				Shen, CuiZhen; Pang, Samantha Mei-Che; Kwong, Enid Wai-Yung; Cheng, ZhiQing			The effect of Chinese food therapy on community dwelling Chinese hypertensive patients with Yin-deficiency	JOURNAL OF CLINICAL NURSING			English	Article						Chinese food therapy; hypertension; quality of life; traditional Chinese medicine; Yin-deficiency	QUALITY-OF-LIFE; BLOOD-PRESSURE; ALTERNATIVE MEDICINE; COMPLEMENTARY; PREVALENCE; AWARENESS; PATTERNS; TRIAL; DIET	Objectives. The objectives of this study are to evaluate the effectiveness of Chinese food therapy in correcting the Yin-deficiency and to examine its impact on the patients' quality of life and hypertension control. Background. Epidemiological studies have shown 14-50% of people with hypertension have Yin-deficiency. Whether restoring the Yin-Yang balance by means of Chinese food therapy can hel…	[Shen, CuiZhen] Zhe Jiang Chinese Med Univ, Sch Nursing, Hangzhou 310053, Peoples R China; [Pang, Samantha Mei-Che; Kwong, Enid Wai-Yung] Hong Kong Polytech Univ, Sch Nursing, Hong Kong, Hong Kong, Peoples R China; [Cheng, ZhiQing] Zhe Jiang Chinese Med Univ, Sch Basic Med, Hangzhou, Peoples R China	Shen, CZ (reprint author), Zhe Jiang Chinese Med Univ, Sch Nursing, Bingwen Rd 548, Hangzhou 310053, Peoples R China.	shencuizhen@163.com						56	3	4	WILEY-BLACKWELL PUBLISHING, INC	MALDEN	COMMERCE PLACE, 350 MAIN ST, MALDEN 02148, MA USA	0962-1067			J CLIN NURS	J. Clin. Nurs.	APR	2010	19	42193					1008
J	Zang, XY; Liu, JF; Chai, YF; Wong, FKY; Zhao, Y				Zang, Xiao-Ying; Liu, Jin-Feng; Chai, Yan-Fen; Wong, Frances Kam Yuet; Zhao, Yue			Effect on blood pressure of a continued nursing intervention using chronotherapeutics for adult Chinese hypertensive patients	JOURNAL OF CLINICAL NURSING			English	Article						ambulatory blood pressure monitoring (ABPM); China; chronotherapeutics; nurses; nursing	ANTIHYPERTENSIVE TREATMENT; DISEASE; TRIAL	Aims and objectives. (1) To explore the effect of continued nursing intervention on hypertensive patients based on chronotherapeutics. (2) To identify the factors affecting hypertensive patients' compliance to the chronotherapeutics-oriented nursing interventions. Background. Chronotherapy provides a means of individual treatment for hypertension according to the circadian blood-pressure profile …	[Zang, Xiao-Ying; Zhao, Yue] Tianjin Med Univ, Sch Nursing, Tianjin, Peoples R China; [Liu, Jin-Feng] Shandong Univ Tradit Chinese Med, Sch Nursing, Tianjin, Peoples R China; [Chai, Yan-Fen] Tianjin Med Univ, Gen Hosp, Emergency Dept, Tianjin, Peoples R China; [Wong, Frances Kam Yuet] Hong Kong Polytech Univ, Sch Nursing, Hong Kong, Hong Kong, Peoples R China	Zhao, Y (reprint author), Tianjin Med Univ, Sch Nursing, Tianjin, Peoples R China.	yuezhao35@hotmail.com			Tianjin Medical University	We thank the participants and staff for their long-time commitment to the study. The source of funding came from Scientific Fund of Tianjin Medical University.		25	2	2	WILEY-BLACKWELL PUBLISHING, INC	MALDEN	COMMERCE PLACE, 350 MAIN ST, MALDEN 02148, MA USA	0962-1067			J CLIN NURS	J. Clin. Nurs.	APR	2010	19	42193					1149
J	Yu, HD; Petrini, MA				Yu, Hui-Dan; Petrini, Marcia A.			The HRQoL of Chinese patients undergoing haemodialysis	JOURNAL OF CLINICAL NURSING			English	Article						Chinese; haemodialysis patients; nurses; nursing; quality of life; renal	QUALITY-OF-LIFE; STAGE RENAL-DISEASE; DIALYSIS; HEALTH; QUESTIONNAIRE; TRANSPLANTATION; THERAPY	Background. With the transition from infectious disease and acute illness to chronic disease and degenerative illness as leading causes of death, health-related quality of life has become an important aspect in assessing the burden of chronic disease. The quality of life of haemodialysis patients has been studied extensively; however, very limited research using exploratory descriptive design has…	[Yu, Hui-Dan; Petrini, Marcia A.] Wuhan Univ, Fac HOPE, Sch Nursing, Wuhan 430072, Peoples R China; [Yu, Hui-Dan] Wuhan Univ, ZhongNan Hosp, Wuhan 430072, Peoples R China	Yu, HD (reprint author), Wuhan Univ, Fac HOPE, Sch Nursing, Wuhan 430072, Peoples R China.	flyyhd@yahoo.com.cn	Almoayad, Fatmah/A-9961-2012					28	6	6	WILEY-BLACKWELL PUBLISHING, INC	MALDEN	COMMERCE PLACE, 350 MAIN ST, MALDEN 02148, MA USA	0962-1067			J CLIN NURS	J. Clin. Nurs.	MAR	2010	19	42130					658
J	Wang, HH; Zhou, J; Huang, L; Li, XH; Fennie, KP; Williams, AB				Wang, Honghong; Zhou, Jun; Huang, Ling; Li, Xianhong; Fennie, Kristopher P.; Williams, Ann B.			Effects of nurse-delivered home visits combined with telephone calls on medication adherence and quality of life in HIV-infected heroin users in Hunan of China	JOURNAL OF CLINICAL NURSING			English	Article						acquired immunodeficiency syndrome; adherence; antiretroviral treatment; heroin addiction; home visit; quality of life; telephone intervention	ACTIVE ANTIRETROVIRAL THERAPY; SELF-REPORTED ADHERENCE; IMPROVE ADHERENCE; CLINICAL-TRIALS; HIV/AIDS; INTERVENTION; CHALLENGES; LITERACY; OUTCOMES; PEOPLE	Aims and objectives. This study aimed to examine the effects of nurse-delivered home visits combined with telephone intervention on medication adherence, and quality of life in HIV-infected heroin users. Background. Drug use is consistently reported as a risk factor for medication non-adherence in HIV-infected people. Design. An experimental, pretests and post-tests, design was used: baseline and…	[Wang, Honghong; Zhou, Jun; Huang, Ling; Li, Xianhong] Cent S Univ, Sch Nursing, Changsha 410013, Hunan, Peoples R China; [Fennie, Kristopher P.] Yale Univ, Sch Nursing, New Haven, CT 06536 USA	Wang, HH (reprint author), Cent S Univ, Sch Nursing, 172 Tong Zi Po Rd, Changsha 410013, Hunan, Peoples R China.	honghong_wang@tom.com			AIDS [2007OR17]	This study was funded by China's 4th Round of Global Fund on AIDS (2007OR17). We would like to express our sincere gratitude to colleagues working in Hengyang, Chenzhou and Yueyang ART treatment sites for their support. We thank Naoko Kozuki for reviewing the manuscript. The authors would like to thank all participants, their families and friends for their participation.		32	19	22	WILEY-BLACKWELL	MALDEN	COMMERCE PLACE, 350 MAIN ST, MALDEN 02148, MA USA	0962-1067			J CLIN NURS	J. Clin. Nurs.	FEB	2010	19	42067					380
J	Shi, QF; Ostwald, SK; Wang, SP				Shi, Qifang; Ostwald, Sharon K.; Wang, Shaopeng			Improving glycaemic control self-efficacy and glycaemic control behaviour in Chinese patients with Type 2 diabetes mellitus: randomised controlled trial	JOURNAL OF CLINICAL NURSING			English	Article						behaviour; China; patient; randomised controlled trials; self-efficacy; type 2 Diabetes	EDUCATIONAL INTERVENTIONS; METABOLIC-CONTROL; META-ANALYSIS; MANAGEMENT; KNOWLEDGE; ADULTS; CARE; METAANALYSIS; OUTCOMES; SCALE	Aims and objectives. To examine the effect of a hospital-based clinic intervention on glycaemic control self-efficacy and glycaemic control behaviour of Chinese patients with type 2 diabetes mellitus (DM). Background. Self-efficacy expectations are related to self-management of diabetes and, in conjunction with environmental support, are better predictors of behaviour than are knowledge and skill…	[Shi, Qifang] Xi An Jiao Tong Univ, Coll Med, Fac Nursing, Xian 710061, Shaanxi, Peoples R China; [Ostwald, Sharon K.] Univ Texas Hlth Sci Ctr Houston, Sch Nursing, Houston, TX USA; [Wang, Shaopeng] Xi An Jiao Tong Univ, Fac Comp Sci, Xian 710061, Shaanxi, Peoples R China	Shi, QF (reprint author), Xi An Jiao Tong Univ, Coll Med, Fac Nursing, 76 Yan Ta W Rd, Xian 710061, Shaanxi, Peoples R China.	shichenqing@gmail.com						28	16	16	WILEY-BLACKWELL PUBLISHING, INC	MALDEN	COMMERCE PLACE, 350 MAIN ST, MALDEN 02148, MA USA	0962-1067			J CLIN NURS	J. Clin. Nurs.	FEB	2010	19	42067					398
J	Zhou, YX; Ren, WH; Irvine, EJ; Yang, DH				Zhou, Yunxian; Ren, Weihong; Irvine, Elizabeth Jan; Yang, Dagan			Assessing health-related quality of life in patients with inflammatory bowel disease in Zhejiang, China	JOURNAL OF CLINICAL NURSING			English	Article						Crohn's disease; health-related quality of life; inflammatory bowel disease; ulcerative colitis	ULCERATIVE-COLITIS; CROHNS-DISEASE; CULTURAL-ADAPTATION; QUESTIONNAIRE IBDQ; RELIABLE MEASURE; VALIDATION; TRANSLATION; VERSION; RELIABILITY; PROGNOSIS	Aims. The aim of this study was to assess health-related quality of life in patients with inflammatory bowel disease in Zhejiang, Mainland China. Background. The incidence of inflammatory bowel disease in China is believed to be low but has been increasing in the past decade. The quality of life of Chinese patients with inflammatory bowel disease is unknown. Design. A cross-sectional study. Metho…	[Yang, Dagan] Zhejiang Univ, Coll Med, Affiliated Hosp 1, Dept Lab, Hangzhou 31003, Zhejiang, Peoples R China; [Zhou, Yunxian; Ren, Weihong] Zhejiang Univ, Coll Med, Affiliated Hosp 2, Dept Nursing, Hangzhou 31003, Zhejiang, Peoples R China; [Irvine, Elizabeth Jan] Univ Toronto, Div Gastroenterol, Toronto, ON, Canada; [Irvine, Elizabeth Jan] St Michaels Hosp, Toronto, ON M5B 1W8, Canada	Yang, DH (reprint author), Zhejiang Univ, Coll Med, Affiliated Hosp 1, Dept Lab, Hangzhou 31003, Zhejiang, Peoples R China.	china_ydg@hotmail.com						56	2	5	WILEY-BLACKWELL PUBLISHING, INC	MALDEN	COMMERCE PLACE, 350 MAIN ST, MALDEN 02148, MA USA	0962-1067			J CLIN NURS	J. Clin. Nurs.	JAN	2010	19	42006					79
J	Guo, J; Whittemore, R; He, GP				Guo, Jia; Whittemore, Robin; He, Guo-Ping			Factors that influence health quotient in Chinese college undergraduates	JOURNAL OF CLINICAL NURSING			English	Article						China; health promotion; health quotient; holistic health; nurse; undergraduates	UNIVERSITY-STUDENTS; MENTAL-HEALTH; BEHAVIORS	Aim and objectives. The purpose of this study was to describe the health quotient of Chinese undergraduates, to discern whether socio-demographic characteristics, academic achievements and perceived health status significantly affect the health quotient of Chinese college students and to identify the predictable factors of health quotient in undergraduates. Background. Rapidly increasing enrollme…	[Guo, Jia; He, Guo-Ping] Cent S Univ, Sch Nursing, Changsha, Hunan, Peoples R China; [Whittemore, Robin] Yale Univ, Sch Nursing, New Haven, CT 06536 USA	He, GP (reprint author), Cent S Univ, Sch Nursing, Changsha, Hunan, Peoples R China.	hgpcsu@yahoo.com.cn			Central South University, China [2340-77322]	This work was funded by a grant from Central South University, China; contract grant number: 2340-77322. The authors gratefully acknowledge the undergraduates in our sample universities. We also would like to thank Wang Honghong and Xiong Guoqiang on consultant of deign, thank Zhou Wenjuan, Yuan Qun, Qiu Huili and Gao Jing on data collection. The advice and help of Professor Alonzo Angelo and Rey…		42	1	4	WILEY-BLACKWELL	MALDEN	COMMERCE PLACE, 350 MAIN ST, MALDEN 02148, MA USA	0962-1067			J CLIN NURS	J. Clin. Nurs.	JAN	2010	19	42006					145
J	Xu, HX; You, ZJ; Zhang, H; Li, ZQ				Xu Hong-xia; You Zhi-jian; Zhang Hong; Li Zhiqing			Prevention of Hypothermia by Infusion of Warm Fluid During Abdominal Surgery	JOURNAL OF PERIANESTHESIA NURSING			English	Article						temperature; fluid; hypothermia; PACU; perioperative normothermia		Perioperative hypothermia can lead to a number of complications for patients after surgery. The aim of this pilot study was to evaluate the efficacy of warm fluids in maintaining normal core temperature during the intraoperative period. We studied 30 American Society of Anesthesiologists (ASA) physical status I or II adult patients who required general anesthesia for abdominal surgery. In the con…	[Xu Hong-xia; You Zhi-jian; Li Zhiqing] Jiangsu Univ, Affiliated Hosp, Dept Anesthesiol, Zhenjiang 212001, Jiangsu, Peoples R China; [Zhang Hong] Shantou Univ, Coll Med, Affiliated Hosp 1, Dept Nursing, Shantou, Guangdong, Peoples R China	You, ZJ (reprint author), Jiangsu Univ, Affiliated Hosp, Dept Anesthesiol, Zhenjiang 212001, Jiangsu, Peoples R China.	anesthesia_yzj@yahoo.com.cn						17	0	0	ELSEVIER SCIENCE INC	NEW YORK	360 PARK AVE SOUTH, NEW YORK, NY 10010-1710 USA	1089-9472			J PERIANESTH NURS	J. PeriAnesthesia Nurs.	DEC	2010	25	6					366
J	Liang, YX; Gu, MN; Wang, SD; Chu, HC				Liang, Yong X.; Gu, Miao N.; Wang, Shi D.; Chu, Hai C.			Perianesthesia Management of Raynaud's Phenomenon-A Case Report	JOURNAL OF PERIANESTHESIA NURSING			English	Article						Raynaud's phenomenon; surgery; anesthesia; oxygen saturation; perianesthesia care; case study	ALCOHOL-CONSUMPTION; SCLERODERMA	This article presents a case report of a 52-year-old female patient with lung cancer presenting with Raynaud's phenomenon during thoracic surgery. Experiences and lessons learned from this case are presented. The classification, pathogenesis, and perianesthesia management of Raynaud's phenomenon are discussed.	[Liang, Yong X.; Wang, Shi D.; Chu, Hai C.] Qingdao Univ, Coll Med, Affiliated Hosp, Dept Anesthesiol, Qingdao 266000, Peoples R China; [Liang, Yong X.; Gu, Miao N.] Nan Fang Hosp, Nan Fang Med Coll, Dept Anesthesiol, Guangzhou, Guangdong, Peoples R China	Liang, YX (reprint author), Qingdao Univ, Coll Med, Affiliated Hosp, Dept Anesthesiol, Qingdao 266000, Peoples R China.	liangzi66@hotmail.com						21	0	0	ELSEVIER SCIENCE INC	NEW YORK	360 PARK AVE SOUTH, NEW YORK, NY 10010-1710 USA	1089-9472			J PERIANESTH NURS	J. PeriAnesthesia Nurs.	AUG	2010	25	4					221
J	Chen, HL; Cai, DY; Shen, WQ; Liu, P				Chen, Hong-Lin; Cai, Duan-Ying; Shen, Wang-Qin; Liu, Peng			Bibliometric Analysis of Pressure Ulcer Research 1990-2009	JOURNAL OF WOUND OSTOMY AND CONTINENCE NURSING			English	Article							PREVENTION; INDEX	PURPOSE: Bibliometric evaluation provides a method for evaluating trends in publications related to a specific topic. This search focused on pressure ulcer (PU) care; journals and authors with the greatest contribution and impact were emphasized. DESIGN: Bibliometric evaluation. METHODS: Data encompassing the period from 1990 to 2009 were extracted from the Science Citation Index online version. …	[Chen, Hong-Lin; Cai, Duan-Ying; Shen, Wang-Qin; Liu, Peng] Nantong Univ, Sch Nursing, Nantong 226001, Jiangsu, Peoples R China; [Chen, Hong-Lin; Shen, Wang-Qin] Fudan Univ, Sch Nursing, Shanghai 200433, Peoples R China	Chen, HL (reprint author), Nantong Univ, Sch Nursing, Qi Xiu Rd 19, Nantong 226001, Jiangsu, Peoples R China.	pphss@126.com						13	1	1	LIPPINCOTT WILLIAMS & WILKINS	PHILADELPHIA	530 WALNUT ST, PHILADELPHIA, PA 19106-3621 USA	1071-5754			J WOUND OSTOMY CONT	J. Wound Ostomy Cont. Nurs.	NOV-DEC	2010	37	6					627
J	Yao, WX; Yang, BA; Yao, C; Bai, PS; Qian, YR; Huang, CH; Liu, MA				Yao, Wan-Xia; Yang, Biao; Yao, Cong; Bai, Pei-Song; Qian, Yao-Rong; Huang, Cai-Hui; Liu, Miao			Needlestick injuries among nursing students in China	NURSE EDUCATION TODAY			English	Article						Nurse interns; Occupational needlestick injuries; China	MEDICAL-STUDENTS; SHARPS INJURIES; HEALTH-CARE; EXPOSURES	Objectives: To describe and characterize the rates and the nature of needlestick injuries among nursing students in China. Methods: A questionnaire was delivered to 248 randomly selected nursing students from seven training hospitals to obtain information relevant occupational needlestick injuries. Results: A total of 1144 incidents of needlestick injuries were reported among the 246 nurses durin…	[Yao, Wan-Xia; Bai, Pei-Song; Liu, Miao] Xi An Jiao Tong Univ, Affiliated Hosp 1, Xian 710061, Shaanxi Prov, Peoples R China; [Yao, Wan-Xia; Liu, Miao] Xi An Jiao Tong Univ, Sch Life Sci & Technol, Xian 710049, Peoples R China; [Yang, Biao] Fudan Univ, Dept Illuminating Engn & Light Source, Shanghai 200433, Peoples R China; [Yao, Cong] Xi An Jiao Tong Univ, Affiliated Hosp 2, Xian 710003, Shaanxi…	Yao, WX (reprint author), Room 111,Bldg 28,North Block, Xian 710061, Shaanxi, Peoples R China.	yaowanxia@163.com	YANG, Biao/L-1558-2013					14	4	6	CHURCHILL LIVINGSTONE	EDINBURGH	JOURNAL PRODUCTION DEPT, ROBERT STEVENSON HOUSE, 1-3 BAXTERS PLACE, LEITH WALK, EDINBURGH EH1 3AF, MIDLOTHIAN, SCOTLAND	0260-6917	1532-2793		NURS EDUC TODAY	Nurse Educ. Today	JUL	2010	30	5					435
J	Ni, CP; Liu, XW; Hua, QZ; Lv, A; Wang, B; Yan, YP				Ni, Chunping; Liu, Xiwen; Hua, Qianzhen; Lv, Aili; Wang, Bo; Yan, Yongping			Relationship between coping, self-esteem, individual factors and mental health among Chinese nursing students: A matched case-control study	NURSE EDUCATION TODAY			English	Article						Mental health; Nursing students; SCL-90; Coping; Self-esteem; Individual factors	BEHAVIORAL-PROBLEMS; PHYSICAL-ACTIVITY; SUBSTANCE USE; ADOLESCENTS; STRESS; DISORDERS; CHILDREN; ASSOCIATIONS; DEPRESSION; PREVALENCE	Purpose: To investigate the relationship between ways of coping, self-esteem, individual factors and mental health among Chinese nursing students. Method: A sample of 515 nursing students was selected from four public institutes and colleges in Xi'an of China by a random sampling method. They were surveyed by a self-evaluation questionnaire including the Symptom-Checklist 90 (SCL-90), the Simplif…	[Ni, Chunping; Liu, Xiwen; Hua, Qianzhen] Fourth Mil Med Univ, Dept Nursing, Xian 710032, Shaanxi, Peoples R China; [Ni, Chunping; Wang, Bo; Yan, Yongping] Fourth Mil Med Univ, Dept Epidemiol, Sch Mil Prevent Med, Xian 710032, Shaanxi, Peoples R China; [Lv, Aili] Xi An Jiao Tong Univ, Sch Med, Fac Nursing, Xian 710061, Shaanxi, Peoples R China	Hua, QZ (reprint author), Fourth Mil Med Univ, Dept Nursing, 17 Changlexi St, Xian 710032, Shaanxi, Peoples R China.	jhfmmu@fmmu.edu.cn						42	2	3	CHURCHILL LIVINGSTONE	EDINBURGH	JOURNAL PRODUCTION DEPT, ROBERT STEVENSON HOUSE, 1-3 BAXTERS PLACE, LEITH WALK, EDINBURGH EH1 3AF, MIDLOTHIAN, SCOTLAND	0260-6917			NURS EDUC TODAY	Nurse Educ. Today	MAY	2010	30	4					338
J	Hong, JF; Fongkaew, W; Senaratana, W; Tonmukayakul, O				Hong, Jingfang; Fongkaew, Warunee; Senaratana, Wilawan; Tonmukayakul, Ouyporn			Development of a theory-based sexual and reproductive health promotion and HIV prevention program for Chinese early adolescents	NURSING & HEALTH SCIENCES			English	Article						Chinese early adolescents; HIV prevention; sexual and reproductive health promotion; technical collaborative action research	YOUNG-PEOPLE; EDUCATION; RISK; BEHAVIORS; STUDENTS; INTERVENTION; PREGNANCY; SCHOOLS; YOUTH; AIDS	The purpose of this study was to develop a theory-based program for Chinese early adolescents in order to promote their sexual and reproductive health and to prevent HIV infection. The program was designed based on the Information-Motivation-Behavioral skills model and a needs assessment among the stakeholders. A technical collaborative action research approach was applied. The study's participan…	[Hong, Jingfang] Anhui Med Univ, Sch Nursing, He Fei City 230601, Anhui, Peoples R China; [Hong, Jingfang; Fongkaew, Warunee; Senaratana, Wilawan; Tonmukayakul, Ouyporn] Chiang Mai Univ, Fac Nursing, Chiang Mai 50000, Thailand	Hong, JF (reprint author), Anhui Med Univ, Sch Nursing, 15 Fei Cui Rd, He Fei City 230601, Anhui, Peoples R China.	hjftong@gmail.com			China Medical Board, USA; Graduate School at Chiang Mai University, Thailand	The authors gratefully acknowledge the funding from the Faculty of Nursing, Chiang Mai University that was provided by the China Medical Board, USA and the Graduate School at Chiang Mai University, Thailand. The primary author wishes to express her gratitude to the Anhui Provincial Education Department for listing this project as "Natural Science Foundation Project" with the number of 2008 jq1168.		45	2	2	WILEY-BLACKWELL	MALDEN	COMMERCE PLACE, 350 MAIN ST, MALDEN 02148, MA USA	1441-0745			NURS HEALTH SCI	Nurs. Health Sci.	SEP	2010	12	3					360
J	Zhou, YX; Windsor, C; Coyer, F; Theobald, K				Zhou, Yunxian; Windsor, Carol; Coyer, Fiona; Theobald, Karen			Ambivalence and the experience of China-educated nurses working in Australia	NURSING INQUIRY			English	Article						ambivalence; experience; immigrants; immigration; nurses	INTERGENERATIONAL AMBIVALENCE; SOCIOLOGICAL AMBIVALENCE; LIVED EXPERIENCES; LIFE	The last decade has seen an increase in research on the experience of immigrant nurses. There are two prevailing approaches in this body of work. One is a focus on the positive or negative aspects of the experience, and the other, a depiction of the experience as a linear movement from struggle to a comfortable state. Based on our study findings on the experience of China-educated nurses working …	[Zhou, Yunxian] Zhejiang Chinese Med Univ, Sch Nursing, Hangzhou 310016, Zhejiang, Peoples R China; [Windsor, Carol; Coyer, Fiona; Theobald, Karen] Queensland Univ Technol, Brisbane, Qld 4001, Australia	Zhou, YX (reprint author), Zhejiang Chinese Med Univ, Sch Nursing, Hangzhou 310016, Zhejiang, Peoples R China.	yunxianzhou@hotmail.com						42	2	2	WILEY-BLACKWELL	MALDEN	COMMERCE PLACE, 350 MAIN ST, MALDEN 02148, MA USA	1320-7881			NURS INQ	Nurs. Inq.	SEP	2010	17	3					186
J	Liu, WH; Liu, J				Liu Weihua; Liu Jing			Probiotics for Treating Persistent Diarrhea in Children	AMERICAN JOURNAL OF NURSING			English	Article									[Liu Weihua; Liu Jing] Taishan Med Univ, Sch Nursing, Tai An, Shandong, Peoples R China	Liu, WH (reprint author), Taishan Med Univ, Sch Nursing, Tai An, Shandong, Peoples R China.							1	0	0	LIPPINCOTT WILLIAMS & WILKINS	PHILADELPHIA	530 WALNUT ST, PHILADELPHIA, PA 19106-3621 USA	0002-936X			AM J NURS	Am. J. Nurs.	DEC	2011	111	12					61
J	Park, SE; Yoon, SN; Yi, Y; Cui, W; Nam, B				Park, SoonBok E.; Yoon, Soon-Nyung; Yi, Yunjeong; Cui, Wenying; Nam, Bora			Prevalence and Risk Factors of Adolescents Smoking: Difference Between Korean and Korean-Chinese	ASIAN NURSING RESEARCH			English	Article						adolescent; risk factor; smoking; cross-cultural comparison	PARENTAL SMOKING; TOBACCO CONTROL; SOCIOECONOMIC-STATUS; ALCOHOL-CONSUMPTION; CIGARETTE-SMOKING; SCHOOL-STUDENTS; BEHAVIOR; TRAJECTORIES; INITIATION; PATTERNS	Purpose: The purpose of this study was to compare smoking prevalence and risk factors of smoking between Korean and Korean-Chinese middle school students. Methods: Data was collected from seventh and eighth grade students from 12 schools in Korea and 6 schools in China. Descriptive statistics, Chi-square test, and t test were performed. Results: For data analysis 10,002 usable surveys were utiliz…	[Park, SoonBok E.] Yanbian Univ Sci & Technol, Dept Nursing, Yanji 133000, Jilin, Peoples R China; [Yoon, Soon-Nyung] Seoul Natl Univ, Coll Nursing, Seoul 151, South Korea; [Cui, Wenying] Yonsei Univ, Sch Publ Hlth, Seoul 120749, South Korea; [Nam, Bora] Univ Calif San Francisco, Sch Nursing, San Francisco, CA 94143 USA	Park, SE (reprint author), Yanbian Univ Sci & Technol, Dept Nursing, 3458 Choyang St, Yanji 133000, Jilin, Peoples R China.	psalmpark@gmail.com						54	1	1	ELSEVIER SCIENCE INC	NEW YORK	360 PARK AVE SOUTH, NEW YORK, NY 10010-1710 USA	1976-1317			ASIAN NURS RES	Asian Nurs. Res.	SEP	2011	5	3					189
J	Yu, CH; Wang, J; Fu, Y; Mao, YQ; Chen, YS; Jiang, YD; Liao, XJ; Guo, JH; Xu, Q; Li, JY				Yu, Chunhua; Wang, Jin; Fu, Yan; Mao, Yongqiu; Chen, Yongshun; Jiang, Yongdong; Liao, Xuejuan; Guo, Juhong; Xu, Qiong; Li, Junying			Treatment of Skin Injury due to Vinorelbine Extravasation Using bFGF and rhGM-CSF: An Experimental Study in a Murine Model	BIOLOGICAL RESEARCH FOR NURSING			English	Article						bFGF; rhGM-CSF; vinorelbine; extravasation; murine model	FIBROBLAST-GROWTH-FACTOR; INDUCED DECUBITUS ULCER; MANAGEMENT; NECROSIS; MICE	Background and objective: A murine model of skin injury from vinorelbine extravasation was established to evaluate the treatment efficacy of basic fibroblast growth factor (bFGF) and recombinant human granulocyte-macrophage colony-stimulating factor (rhGM-CSF). Materials and method: Experimental models were divided into bFGF, rhGM-CSF, and control (saline) groups, with 40 mice in each group. Edem…	[Yu, Chunhua; Wang, Jin; Fu, Yan; Mao, Yongqiu; Chen, Yongshun; Jiang, Yongdong; Liao, Xuejuan; Guo, Juhong; Xu, Qiong; Li, Junying] Sichuan Univ, W China Sch Clin Med, W China Hosp, Div Thorac Oncol, Chengdu 610041, Peoples R China	Li, JY (reprint author), Sichuan Univ, W China Sch Med, W China Hosp, Div Thorac Oncol,Canc Ctr, 37 Guoxue Lane, Chengdu 610041, Peoples R China.	lijunying2005@sina.com						24	4	4	SAGE PUBLICATIONS INC	THOUSAND OAKS	2455 TELLER RD, THOUSAND OAKS, CA 91320 USA	1099-8004			BIOL RES NURS	Biol. Res. Nurs.	JAN	2011	13	1					32
J	Tian, G; Chen, B; Qi, L; Zhu, Y				Tian, Geng; Chen, Bin; Qi, Li; Zhu, Yan			Modified Insertion of a Peripherally Inserted Central Catheter: Taking the Chest Radiograph Earlier	CRITICAL CARE NURSE			English	Article							CENTRAL VENOUS CATHETERS; TIP POSITION; COMPLICATIONS; PLACEMENT; INFECTION; DEVICES	Placement of the tip of a peripherally inserted central catheter in the lower third of the superior vena cava is essential to minimize the risk of complications. Sometimes, however, the catheter tip cannot be localized clearly on the chest radiograph, and repositioning a catheter at bedside is difficult, sometimes impossible. A chest radiograph obtained just after the catheter is inserted, before…	[Tian, Geng; Zhu, Yan] Shenzhen Univ, Affiliated Hosp 1, Dept Tumor, Shenzhen Peoples Hosp 2, Shenzhen 518035, Peoples R China; [Chen, Bin; Qi, Li] Shenzhen Univ, Affiliated Hosp 1, Dept Nursing, Shenzhen Peoples Hosp 2, Shenzhen 518035, Peoples R China	Tian, G (reprint author), Shenzhen Univ, Affiliated Hosp 1, Dept Tumor, Shenzhen Peoples Hosp 2, 3002 Sungang W Rd, Shenzhen 518035, Peoples R China.	gengtian71@yahoo.cn			Shenzhen Bureau of Science, Technology Information [200703272]	This study was supported in part by a grant (200703272) from the Science and Technology Grants for Medicine and Health Research from the Shenzhen Bureau of Science, Technology & Information.		45	1	3	AMER ASSOC CRITICAL CARE NURSES	ALISO VIEJO	101 COLUMBIA, ALISO VIEJO, CA 92656 USA	0279-5442	1940-8250		CRIT CARE NURSE	Crit. Care Nurse	APR	2011	31	2					64
J	Zhang, YB; Niu, HT; Chang, JW; Dong, GL; Ma, XB				Zhang, Y. B.; Niu, H. T.; Chang, J. W.; Dong, G. L.; Ma, X. B.			EZH2 silencing by RNA interference inhibits proliferation in bladder cancer cell lines	EUROPEAN JOURNAL OF CANCER CARE			English	Article						EZH2; bladder cancer; RNA interference; proliferation	AGGRESSIVE BREAST-CANCER; POLYCOMB-GROUP PROTEINS; UROTHELIAL NEOPLASMS; EXPRESSION; GENE; CLASSIFICATION; CARCINOMA; METHYLATION; PROSTATE; MARKER	The Enhancer of Zeste homologue2 gene (EZH2) is frequently expressed at high levels in malignant tumours, including bladder cancer. It functions as a transcriptional regulator to the maintenance of cell identity, cell cycle regulation and oncogenesis. In the study, we detected EZH2 expression in bladder cancer tissues. These results showed EZH2 high expression in bladder cancer tissue at level of…	[Chang, J. W.] Tianjin Med Univ, Tianjin Urol Inst, Tianjin 300211, Peoples R China; [Zhang, Y. B.] N China Coal Med Univ, Dept Physiol, Tangshan, Hebei Province, Peoples R China; [Niu, H. T.] Qingdao Univ, Coll Med, Affiliated Hosp, Dept Urol, Qingdao 266071, Shandong, Peoples R China; [Dong, G. L.] Tangshan Peoples Hosp, Dept Oncol, Tangshan, Hebei Province, Peoples R China; [Ma, X. B.] N China…	Chang, JW (reprint author), Tianjin Med Univ, Tianjin Urol Inst, Tianjin 300211, Peoples R China.	changjiwu2004@yahoo.com.cn			National Science Fundation of China [NSFC30371601]	This work was supported by National Science Fundation of China to Chang JW (NSFC30371601).		23	6	8	WILEY-BLACKWELL PUBLISHING, INC	MALDEN	COMMERCE PLACE, 350 MAIN ST, MALDEN 02148, MA USA	0961-5423			EUR J CANCER CARE	Eur. J. Cancer Care	JAN	2011	20	1					106
J	Zhou, YX; Windsor, C; Theobald, K; Coyer, F				Zhou, Yunxian; Windsor, Carol; Theobald, Karen; Coyer, Fiona			The concept of difference and the experience of China-educated nurses working in Australia: A symbolic interactionist exploration	INTERNATIONAL JOURNAL OF NURSING STUDIES			English	Article						China-educated nurses; Difference; Immigrant nurses; Racialisation; Symbolic interactionism	REPUBLIC-OF-CHINA; ADJUSTMENT; STUDENTS; BARRIERS; STRANGE	Background: The migration of registered nurses as a response to a global nurse shortage has seen a growth in research interest in this area. Much of the research focuses on differences in language and culture which are posed as the attributes of the immigrant nurse. Objectives: In reporting on an analysis of data drawn from China-educated nurses working in the Australian health care system, this …	[Zhou, Yunxian] Zhejiang Chinese Med Univ, Sch Nursing, Hangzhou, Zhejiang, Peoples R China; [Windsor, Carol; Theobald, Karen; Coyer, Fiona] Queensland Univ Technol, Sch Nursing & Midwifery, Brisbane, Qld 4001, Australia	Zhou, YX (reprint author), Zhejiang Chinese Med Univ, Sch Nursing, Hangzhou, Zhejiang, Peoples R China.	yunxianzhou@hotmail.com						50	4	4	PERGAMON-ELSEVIER SCIENCE LTD	OXFORD	THE BOULEVARD, LANGFORD LANE, KIDLINGTON, OXFORD OX5 1GB, ENGLAND	0020-7489			INT J NURS STUD	Int. J. Nurs. Stud.	NOV	2011	48	11					1420
J	Wan, CH; Fang, JQ; Jiang, RS; Shen, J; Jiang, D; Tu, X; Messing, S; Tang, W				Wan, Chonghua; Fang, Jiqian; Jiang, Runsheng; Shen, Jie; Jiang, Dan; Tu, Xin; Messing, Susan; Tang, Wan			Development and validation of a quality of life instrument for patients with drug dependence: Comparisons with SF-36 and WHOQOL-100	INTERNATIONAL JOURNAL OF NURSING STUDIES			English	Article						Drug dependency; Psychometric properties; Standardized response mean; SF-36; WHOQOL-100	ASSESSING RESPONSIVENESS; CANCER-PATIENTS; RECOMMENDATIONS; ABUSERS; SYSTEM	Aim: Our goal was to develop a self-administered quality of life scale for patients with drug addiction/dependence (QOL-DA) and compare it with the SF-36 and the WHOQOL-100. Methods: Employing theory and methodology of rating scale construction, a self-administered quality of life instrument for individuals with drug dependence QOL-DA was developed and evaluated utilizing responses from 212 drug-…	[Wan, Chonghua] Guangdong Med Coll, Sch Humanities & Management, Dongguan 523808, Peoples R China; [Fang, Jiqian] Sun Yat Sen Univ, Sch Publ Hlth, Guangzhou 510080, Guangdong, Peoples R China; [Jiang, Runsheng; Jiang, Dan] Kunming Med Univ, Kunming 650031, Peoples R China; [Shen, Jie] Kunming Municipal Mandatory Detoxificat & Rehabil, Kunming 650301, Yunnan, Peoples R China; [Tu, Xin; Messing, Su…	Wan, CH (reprint author), Guangdong Med Coll, Sch Humanities & Management, Dongguan 523808, Peoples R China.	wanchh@hotmail.com			National Natural Science Foundation of China [30360092, 30860248]; NIH [1 UL1 RR024160-01]	Supported by the National Natural Science Foundation of China (30360092, 30860248). This work was supported in part by a NIH grant 1 UL1 RR024160-01 when it was completed in the Department of Biostatistics and Computational Biology at the University of Rochester Medical Center.		29	2	3	PERGAMON-ELSEVIER SCIENCE LTD	OXFORD	THE BOULEVARD, LANGFORD LANE, KIDLINGTON, OXFORD OX5 1GB, ENGLAND	0020-7489			INT J NURS STUD	Int. J. Nurs. Stud.	SEP	2011	48	9					1080
J	Cai, CF; Zhou, ZK; Yeh, H; Hu, J				Cai, C. F.; Zhou, Z. K.; Yeh, H.; Hu, J.			Empowerment and its effects on clinical nurses in central China	INTERNATIONAL NURSING REVIEW			English	Article						China; Internal Work Motivation; Job Characteristics; Job Satisfaction; Nursing; Personal Growth; Structural Empowerment	PSYCHOSOCIAL WORK-ENVIRONMENT; JOB CHARACTERISTICS; WORKPLACE EMPOWERMENT; MODERATING ROLE; SATISFACTION; MOTIVATION; BURNOUT; TRUST; MODEL; MAIN	Background: Chinese healthcare institutions have undergone constant changes in recent years. A large number of research studies conducted on work-related factors revealed that nurses in China experienced a low level of job satisfaction and a high level of turnover intention. Empowerment is one of the most important concepts in nursing and is most relevant to the study of nursing professionals' jo…	[Zhou, Z. K.] Cent China Normal Univ, Sch Psychol, Wuhan 430079, Peoples R China; [Cai, C. F.] Wuhan Univ, Hope Sch Nursing, Wuhan 430072, Peoples R China; [Yeh, H.] Univ Memphis, Coll Educ, Memphis, TN 38152 USA; [Hu, J.] Univ N Carolina, Greensboro, NC 27412 USA	Zhou, ZK (reprint author), Cent China Normal Univ, Sch Psychol, Wuhan 430079, Peoples R China.	zhouzk@mail.ccnu.edu.cn						36	6	6	WILEY-BLACKWELL	MALDEN	COMMERCE PLACE, 350 MAIN ST, MALDEN 02148, MA USA	0020-8132			INT NURS REV	Int. Nurs. Rev.	MAR	2011	58	1					138
J	Guo, J; Whittemore, R; He, GP				Guo, Jia; Whittemore, Robin; He, Guo-Ping			The relationship between diabetes self-management and metabolic control in youth with type 1 diabetes: an integrative review	JOURNAL OF ADVANCED NURSING			English	Review						adolescents; children; integrative literature review; metabolic control; self-management; type 1 diabetes	QUALITY-OF-LIFE; GLYCEMIC CONTROL; ADOLESCENTS PERSPECTIVE; ADHERENCE BEHAVIORS; PERSONAL MODELS; CARE BEHAVIORS; RISK-FACTORS; HONG-KONG; CHILDREN; MELLITUS	Aims. The purpose of this integrative review was to describe the relationship between diabetes self-management and metabolic control in youth with type 1 diabetes and to explore factors which affect this relationship. Background. In the past 15 years, research has indicated that youth with type 1 diabetes face considerable self-management challenges and are at increased risk for poor metabolic co…	[Guo, Jia; He, Guo-Ping] Cent S Univ, Sch Nursing, Changsha, Hunan, Peoples R China; [Whittemore, Robin] Yale Univ, Sch Nursing, New Haven, CT USA	He, GP (reprint author), Cent S Univ, Sch Nursing, Changsha, Hunan, Peoples R China.	hgpcsu@yahoo.com.cn			Central South University, China [2340-74334000011]; Education Ministry of China [2340-7113400105.1]; Yale University School of Nursing (YSN)	This work was partly done when Guo, Jia was doing her scholarship at Yale University School of Nursing (YSN). The authors gratefully acknowledge the YSN staff. Thanks to Danielle Altares (University of Pennsylvania) for helping on our manuscript preparations.This work was funded by a grant for PhD students from Central South University, China; contract grant number: 2340-74334000011 and Academic …		66	11	11	WILEY-BLACKWELL	HOBOKEN	111 RIVER ST, HOBOKEN 07030-5774, NJ USA	0309-2402	1365-2648		J ADV NURS	J. Adv. Nurs.	NOV	2011	67	11					2294
J	Yin, HH; He, HY; Arbon, P; Zhu, JC				Yin, Huahua; He, Haiyan; Arbon, Paul; Zhu, Jingci			A survey of the practice of nurses' skills in Wenchuan earthquake disaster sites: implications for disaster training	JOURNAL OF ADVANCED NURSING			English	Article						disaster; disaster training; nurses' skills; nursing practice	QUESTIONNAIRE SURVEY; PREPAREDNESS; EDUCATION; SCHOOL; CHINA	Aims. To determine nursing skills most relevant for nurses participating in disaster response medical teams; make recommendations to enhance training of nurses who will be first responders to a disaster site; to improve the capacity of nurses to prepare and respond to severe natural disasters. Background. Worldwide, nurses play a key role in disaster response teams at disaster sites. They are oft…	[Yin, Huahua; Zhu, Jingci] Third Mil Med Univ, Sch Nursing, Dept Emergency Nursing, Chongqing, Peoples R China; [Arbon, Paul] Flinders Univ S Australia, Sch Nursing & Midwifery, Adelaide, SA 5001, Australia	Zhu, JC (reprint author), Third Mil Med Univ, Sch Nursing, Dept Emergency Nursing, Chongqing, Peoples R China.	jingcizhu2010@gmail.com						18	4	5	WILEY-BLACKWELL	MALDEN	COMMERCE PLACE, 350 MAIN ST, MALDEN 02148, MA USA	0309-2402			J ADV NURS	J. Adv. Nurs.	OCT	2011	67	10					2231
J	Zhu, FF; Lin, Z; Lin, L; Wang, MF				Zhu, Fen-Fen; Lin, Zheng; Lin, Lin; Wang, Mei-Feng			Changes in quality of life during biofeedback for people with puborectalis dyssynergia: generic and disease-specific measures	JOURNAL OF ADVANCED NURSING			English	Article						biofeedback (psychology); constipation; health-related quality of life; nursing; treatment outcome	NORMAL TRANSIT CONSTIPATION; PELVIC FLOOR DYSSYNERGIA; CONTROLLED-TRIAL; PHYSICAL ABUSE; DISORDERS; SUPERIOR; THERAPY; BURDEN; SLOW	P>Aim. The aim of the study was to evaluate the changes in symptoms and quality of life in people with puborectalis dyssynergia after biofeedback by using Short Form-36 and Patient Assessment of Constipation Quality of Life Questionnaire. Background. Biofeedback is an effective treatment in clinical symptoms for puborectalis dyssynergia. However, little is known about the degree of the variation …	[Lin, Zheng] Nanjing Med Univ, Sch Nursing, Nanjing, Jiangsu Prov, Peoples R China; [Lin, Zheng] Nanjing Med Univ, Affiliated Hosp 1, Dept Nursing, Nanjing, Jiangsu Prov, Peoples R China; [Lin, Lin] Nanjing Med Univ, Affiliated Hosp 1, Dept Gastroenterol, Nanjing, Jiangsu Prov, Peoples R China; [Wang, Mei-Feng] Nanjing Med Univ, Affiliated Hosp 1, Gastrointestinal Motil Ctr, Nanjing, Jiangsu Prov…	Lin, Z (reprint author), Nanjing Med Univ, Sch Nursing, Nanjing, Jiangsu Prov, Peoples R China.	linzheng100@163.com			Social Development Foundation of Jiangsu Province [BS2005065]	The research was supported by the Social Development Foundation of Jiangsu Province (No. BS2005065).		32	2	2	WILEY-BLACKWELL	MALDEN	COMMERCE PLACE, 350 MAIN ST, MALDEN 02148, MA USA	0309-2402			J ADV NURS	J. Adv. Nurs.	JUN	2011	67	6					1285
J	Zhang, WQ; Jiang, XL; Ho, KW; Wu, DM				Zhang, Weiqing; Jiang, Xiaolian; Ho, Kit-wan; Wu, Dongmei			The presence of post-traumatic stress disorder symptoms in adolescents three months after an 8.0 magnitude earthquake in southwest China	JOURNAL OF CLINICAL NURSING			English	Article						adolescents; coping strategy; earthquake; locus of control; nurses; nursing; post-traumatic stress disorder	TRAUMATIC INJURY; PTSD SYMPTOMS; SEXUAL-ABUSE; RISK-FACTORS; CHILDREN; DISASTER; PREDICTORS; VICTIMS; TAIWAN; COMORBIDITY	Aims and objectives. The aims of the study were to describe the post-traumatic stress disorder symptoms in adolescent survivors three months after Wenchuan 5.12 Earthquake and to explore its contributing or preventing factors. Background. Adolescents are more vulnerable to be affected by natural disasters because of their special growth stage. Posttraumatic stress disorder symptoms are common res…	[Zhang, Weiqing; Jiang, Xiaolian; Wu, Dongmei] Sichuan Univ, W China Hosp, W China Sch Nursing, Chengdu 610041, Sichuan Provinc, Peoples R China; [Ho, Kit-wan] Hong Kong Polytech Univ, Dept Appl Social Sci, Kowloon, Hong Kong, Peoples R China	Jiang, XL (reprint author), Sichuan Univ, W China Hosp, W China Sch Nursing, 37 Guoxue Xiang St, Chengdu 610041, Sichuan Provinc, Peoples R China.	jiang_xiaolian@126.com			Post-disaster Reconstruction Support & Research Center of Sichuan University; Hong Kong Polytechnic University	This study was funded by The Post-disaster Reconstruction Support & Research Center of Sichuan University and The Hong Kong Polytechnic University. The authors thank those who helped in data collection, and data entry, including research assistants Lijuan Duan, Yongxiong Mao as well as Lei Wang who are all affiliated to West China School of Nursing/West China Hospital, Sichuan University, 37 Guox…		53	3	3	WILEY-BLACKWELL	MALDEN	COMMERCE PLACE, 350 MAIN ST, MALDEN 02148, MA USA	0962-1067			J CLIN NURS	J. Clin. Nurs.	NOV	2011	20	21-22					3057
J	Zang, YL; Zhao, Y; Yang, Q; Pan, YY; Li, N; Liu, T				Zang, Yuli; Zhao, Yong; Yang, Qing; Pan, Yaoyun; Li, Na; Liu, Ting			A randomised trial on pubertal development and health in China	JOURNAL OF CLINICAL NURSING			English	Article						adolescent health; China; health promotion; nurses; nursing; puberty; sexuality	SCHOOL-HEALTH; NURSES; INTERVENTION; RISK	Background. Puberty signifies noticeable physical, psychosocial and sexual development. It is crucial to help adolescents reach an understanding about puberty and related health issues. Considering the sexually conservative culture in some areas, to explore appropriate ways to address sexuality and health-related concerns during puberty is of interest to all stakeholders. Aims. This study aimed t…	[Zhao, Yong] Shandong Univ, Affiliated Middle Sch, Jinan 250100, Shandong, Peoples R China; [Zang, Yuli; Pan, Yaoyun; Li, Na; Liu, Ting] Shandong Univ, Sch Nursing, Jinan 250100, Shandong, Peoples R China; [Yang, Qing] Shandong Univ, Affiliated Middle Sch 1, Jinan 250100, Shandong, Peoples R China	Zhao, Y (reprint author), Shandong Univ, Affiliated Middle Sch, 5 Hong Jia Lou, Jinan 250100, Shandong, Peoples R China.	yulizh@sdu.edu.cn						49	3	3	WILEY-BLACKWELL	MALDEN	COMMERCE PLACE, 350 MAIN ST, MALDEN 02148, MA USA	0962-1067			J CLIN NURS	J. Clin. Nurs.	NOV	2011	20	21-22					3081
J	Zhang, XJ; Wang, AP				Zhang, Xiu-jie; Wang, Ai-ping			Development of a psychosocial adaptation questionnaire for Chinese patients with visual impairments	JOURNAL OF CLINICAL NURSING			English	Article						China; eye disease; nursing; psychometrics; psychosocial adaptation; questionnaires; reliability; validity; visual impairment	MACULAR DEGENERATION	Aim. To develop a psychosocial adaptation questionnaire for Chinese patients with visual impairments and to examine its reliability and validity. Background. Psychosocial adaptation with disease has been studied, however, there have been few reports on the impact of visual impairment on psychosocial adaptation. An instrument has not been developed to assess psychosocial adaptation with visual imp…	[Wang, Ai-ping] China Med Univ, Affiliated Hosp 1, Clin Nursing Sect, Shenyang, Liaoning, Peoples R China; [Zhang, Xiu-jie] China Med Univ, Affiliated Hosp 1, Dept Nursing, Shenyang, Liaoning, Peoples R China	Wang, AP (reprint author), China Med Univ, Affiliated Hosp 1, Clin Nursing Sect, Shenyang, Liaoning, Peoples R China.	jianghaoran88@hotmail.com			Ministry of Education of Liaoning Province [2008750]	We would like to express our gratitude to all the participants in the study and to medical staffs in the ophthalmology department. This study is supported by the Ministry of Education of Liaoning Province (code: 2008750)		18	3	3	WILEY-BLACKWELL	MALDEN	COMMERCE PLACE, 350 MAIN ST, MALDEN 02148, MA USA	0962-1067			J CLIN NURS	J. Clin. Nurs.	OCT	2011	20	19-20					2822
J	Mao, Q; Zhu, LX; Su, XY				Mao, Qing; Zhu, Li-xia; Su, Xiao-yin			A comparison of postnatal depression and related factors between Chinese new mothers and fathers	JOURNAL OF CLINICAL NURSING			English	Article						China; midwifery; new fathers; new mothers; nursing; postnatal depression	PATERNAL POSTPARTUM DEPRESSION; MENTAL-HEALTH; HONG-KONG; POPULATION; METAANALYSIS; EXPERIENCES; STRESS; INFANT; RISK; PREVALENCE	Aims. This study aims to examine the differences in the prevalence of depression and related factors between new mothers and fathers during the postnatal period. Background. Although the transition to motherhood and postnatal depression has been extensively studied, few studies compared maternal and paternal psychological health during the postnatal period. Design. A cross-sectional design was us…	[Mao, Qing; Zhu, Li-xia] Putian Univ, Coll Med, Putian 351100, Peoples R China; [Su, Xiao-yin] Sun Yat Sen Univ, Sch Nursing, Guangzhou 510275, Guangdong, Peoples R China	Mao, Q (reprint author), Putian Univ, Coll Med, Putian 351100, Peoples R China.	mqwrt@163.com			Department of Education, Fujian Province [JA08188]	Funding supported by A Science and Technology Project, Department of Education, Fujian Province (No. JA08188).		46	10	10	WILEY-BLACKWELL	MALDEN	COMMERCE PLACE, 350 MAIN ST, MALDEN 02148, MA USA	0962-1067			J CLIN NURS	J. Clin. Nurs.	MAR	2011	20	42130					645
J	Jin, YH; Tian, JH; Sun, M; Yang, KH				Jin, Yinghui; Tian, Jinhui; Sun, Mei; Yang, Kehu			A systematic review of randomised controlled trials of the effects of warmed irrigation fluid on core body temperature during endoscopic surgeries	JOURNAL OF CLINICAL NURSING			English	Review						endoscopic surgery; irrigation fluid; systematic review; temperature	ARTHROSCOPIC SHOULDER SURGERY; TRANS-URETHRAL RESECTION; BLOOD-LOSS; TRANSURETHRAL PROSTATECTOMY; PERIOPERATIVE NORMOTHERMIA; HYPOTHERMIA; RECOVERY	Aims and objectives. The purpose of this systematic review was to establish whether warmed irrigation fluid temperature could decrease the drop of body temperature and incidence of shivering and hypothermia. Background. Irrigation fluid, which is used in large quantities during endoscopic surgeries at room temperature, is considered to be associated with hypothermia and shivering. It remains cont…	[Jin, Yinghui; Tian, Jinhui; Sun, Mei; Yang, Kehu] Lanzhou Univ, Evidence Based Med Ctr, Sch Basic Med Sci, Lanzhou 730000, Gansu, Peoples R China; [Sun, Mei] Tianjin Med Univ, Dept Nursing, Gen Hosp, Tianjin, Peoples R China; [Yang, Kehu] Lanzhou Univ, Clin Coll 1, Lanzhou 730000, Peoples R China	Yang, KH (reprint author), Lanzhou Univ, Evidence Based Med Ctr, Sch Basic Med Sci, 199 Dong Gang W Rd, Lanzhou 730000, Gansu, Peoples R China.	Kehuyangebm2009@126.com						36	7	7	WILEY-BLACKWELL	HOBOKEN	111 RIVER ST, HOBOKEN 07030-5774, NJ USA	0962-1067	1365-2702		J CLIN NURS	J. Clin. Nurs.	FEB	2011	20	42067					305
J	Sun, N; Li, QJ; Lv, DM; Lin, P; Lu, GZ; An, XM				Sun, Ning; Li, Qiu-Jie; Lv, Dong-Mei; Lin, Ping; Lu, Gui-Zhi; An, Xue-Mei			The psychometric properties of the Chinese version of the Problem Areas in Psychological Empowerment Scale (PES): scale development	JOURNAL OF CLINICAL NURSING			English	Article						evaluation; nursing; PES; psychological response; psychometrics; staff nurses	VALIDITY; JOB	Aims. This study was conducted to adapt the Problem Areas in Psychological Empowerment Scale for use among staff nurses and to evaluate the psychometric properties. Background. Considering the importance of psychological aspects in the administration of nursing, there is a need for validated measurements in this area. Such tools make it possible to understand staff nurses as well as they serve as…	[Sun, Ning; Li, Qiu-Jie; Lv, Dong-Mei; Lin, Ping; Lu, Gui-Zhi] Harbin Med Coll, Affiliated Hosp 2, Dept Nursing, Sch Nursing, Harbin 150040, Peoples R China; [An, Xue-Mei] Hei Longjiang Chinese Tradit Med Univ, Affiliated Hosp 1, Dept Gen Surg, Harbin, Peoples R China	Li, QJ (reprint author), Harbin Med Coll, Affiliated Hosp 2, Dept Nursing, Sch Nursing, Harbin 150040, Peoples R China.	li_qiujie@hotmail.com			Harbin Medical University, Harbin, China [HCXS2007020]	The authors thank Harbin Medical University, Harbin, China, for its financial support for the MSc innovation fund programme in the implementation of this study. Number: HCXS2007020. Thanks for expert panelists and all staff nurses.		16	0	1	WILEY-BLACKWELL PUBLISHING, INC	MALDEN	COMMERCE PLACE, 350 MAIN ST, MALDEN 02148, MA USA	0962-1067			J CLIN NURS	J. Clin. Nurs.	FEB	2011	20	42067					369
J	Luo, D; Hu, J				Luo, Dan; Hu, Jie			Factors Influencing Health-Related Quality of Life Among Minority Elders in Southwest China	JOURNAL OF COMMUNITY HEALTH NURSING			English	Article							OLDER POPULATION; SOCIAL SUPPORT; UNITED-STATES; DEPRESSION; ADULTS; EXPECTANCY; HOSPITALIZATION; MORTALITY; SF-36; US	This study described health-related quality of life and examined the relationship of factors influencing health-related quality of life among minority elders in southwest China. A descriptive correlational study was conducted with a convenience sample of 105 community-dwelling minority elders in Southwest China. The participants reported poor physical health-related quality of life. Depression, c…	[Luo, Dan] Wuhan Univ, HOPE Sch Nursing, Wuhan 430072, Hubei, Peoples R China; [Hu, Jie] Univ N Carolina, Greensboro, NC 27412 USA	Luo, D (reprint author), Wuhan Univ, HOPE Sch Nursing, 115 Donghu Rd, Wuhan 430072, Hubei, Peoples R China.	cindy-fly@163.com						51	0	0	ROUTLEDGE JOURNALS, TAYLOR & FRANCIS LTD	ABINGDON	4 PARK SQUARE, MILTON PARK, ABINGDON OX14 4RN, OXFORDSHIRE, ENGLAND	0737-0016			J COMMUN HEALTH NURS	J. Community Health Nurs.		2011	28	3					156
J	Wang, YY; He, JY; Liu, XP; Li, XF				Wang, Yu-Yin; He, Ji-Yong; Liu, Xiao-Ping; Li, Xiao-Fang			A reliable stowage by means of syringe for preserving split-thickness-skin grafts	JOURNAL OF TISSUE VIABILITY			English	Article						Split-thickness-skin graft; Preservation; Syringe		Introduce a reliable stowage by means of syringe to preserve split-thickness-skin grafts. (C) 2009 Tissue Viability Society. Published by Elsevier Ltd. All rights reserved.	[Wang, Yu-Yin; He, Ji-Yong; Liu, Xiao-Ping; Li, Xiao-Fang] Cent S Univ, Xiangya Hosp 2, Dept Plast & Burns, Changsha 410011, Hunan, Peoples R China	Wang, YY (reprint author), Cent S Univ, Xiangya Hosp 2, Dept Plast & Burns, 86 Renming Rd, Changsha 410011, Hunan, Peoples R China.	wzfhome@yahoo.com.cn						0	0	0	ELSEVIER SCI LTD	OXFORD	THE BOULEVARD, LANGFORD LANE, KIDLINGTON, OXFORD OX5 1GB, OXON, ENGLAND	0965-206X			J TISSUE VIABILITY	J. Viab.	FEB	2011	20	1					35
J	Cheung, NF; Mander, R; Wang, XL; Fu, W; Zhou, H; Zhang, LP				Cheung, Ngai Fen; Mander, Rosemary; Wang, Xiaoli; Fu, Wei; Zhou, Hong; Zhang, Liping			Views of Chinese women and health professionals about midwife-led care in China	MIDWIFERY			English	Article						Women's views; Midwife-led care; Satisfaction	CONTINUITY; BIRTH	Aims: to explore Chinese women's and health professionals' views of the first midwife-led normal birth unit in China to facilitate normal birth and enhance midwifery practice. Method: data collection involved semi-structured interviews, questionnaires and cross-comparison with hospital data. The data were analysed thematically. Setting: a university teaching hospital in a major city in eastern Ch…	[Cheung, Ngai Fen; Fu, Wei; Zhang, Liping] Hangzhou Normal Univ, Coll Nursing, Midwifery Res Unit, Hangzhou, Zhejiang, Peoples R China; [Mander, Rosemary] Univ Edinburgh, Sch Hlth, Edinburgh EH8 9LN, Midlothian, Scotland; [Wang, Xiaoli] Hangzhou First Peoples Hosp, Dept Nursing, Hangzhou, Zhejiang, Peoples R China; [Zhou, Hong] Hangzhou First Peoples Hosp, Labour Ward, Hangzhou, Zhejiang, Peoples…	Cheung, NF (reprint author), Hangzhou Normal Univ, Coll Nursing, Midwifery Res Unit, Hangzhou, Zhejiang, Peoples R China.	nfcheung@btinternet.com						34	1	1	ELSEVIER SCI LTD	OXFORD	THE BOULEVARD, LANGFORD LANE, KIDLINGTON, OXFORD OX5 1GB, OXON, ENGLAND	0266-6138			MIDWIFERY	Midwifery	DEC	2011	27	6					842
J	Cheung, NF; Mander, R; Wang, XL; Fu, W; Zhou, H; Zhang, LP				Cheung, Ngai Fen; Mander, Rosemary; Wang, Xiaoli; Fu, Wei; Zhou, Hong; Zhang, Liping			Clinical outcomes of the first midwife-led normal birth unit in China: a retrospective cohort study	MIDWIFERY			English	Article						Chinese midwives; Midwife-led care; Normal birth; Cohort		Aims: to report the clinical outcomes of the first six months of operation of an innovative midwife-led normal birth unit (MNBU) in China in 2008, aiming to facilitate normal birth and enhance midwifery practice. Setting: an urban hospital with 2000-3000 deliveries per year. Method: this study was part of a major action research project that led to implementation of the MNBU. A retrospective coho…	[Cheung, Ngai Fen; Fu, Wei; Zhang, Liping] Hangzhou Normal Univ, Coll Nursing, Hangzhou 310036, Zhejiang, Peoples R China; [Mander, Rosemary] Univ Edinburgh, Sch Hlth, Edinburgh, Midlothian, Scotland; [Wang, Xiaoli] Hanghzhou First Peoples Hosp, Dept Nursing, Hangzhou, Zhejiang, Peoples R China; [Zhou, Hong] Hanghzhou First Peoples Hosp, Labour Ward, Hangzhou, Zhejiang, Peoples R China	Cheung, NF (reprint author), Hangzhou Normal Univ, Coll Nursing, 16 Xuelin Rd, Hangzhou 310036, Zhejiang, Peoples R China.	nfcheung@btinternet.com						32	1	1	ELSEVIER SCI LTD	OXFORD	THE BOULEVARD, LANGFORD LANE, KIDLINGTON, OXFORD OX5 1GB, OXON, ENGLAND	0266-6138			MIDWIFERY	Midwifery	OCT	2011	27	5					582
J	Tao, FB; Huang, K; Long, X; Tolhurst, R; Raven, J				Tao, Fangbiao; Huang, Kun; Long, Xiang; Tolhurst, Rachel; Raven, Joanna			Low postnatal care rates in two rural counties in Anhui Province, China: Perceptions of key stakeholders	MIDWIFERY			English	Article						Postnatal care; Quality of care; Health seeking behaviour; Utilisation	EMERGENCY OBSTETRIC CARE; CHILD HEALTH; BANGLADESH; BEHAVIOR; NEWBORN; QUALITY; IMPACT	Objective: to explore the perceptions of stakeholders on postnatal care and to describe the rate of postnatal home visits in two rural counties in Anhui Province, China. Design: this was a mixed methods study which uses mainly qualitative methods including focus group discussions, in- depth interviews and key informant interviews. A household survey of postpartum women was used to calculate the r…	[Tao, Fangbiao; Huang, Kun] Anhui Med Univ, Sch Publ Hlth, Hefei 230032, Anhui, Peoples R China; [Long, Xiang] Maternal & Child Hlth Stn Tongling City, Tongling City 244000, Anhui, Peoples R China; [Tolhurst, Rachel; Raven, Joanna] Univ Liverpool, Liverpool Sch Trop Med, Int Hlth Grp, Liverpool L3 5QA, Merseyside, England	Tao, FB (reprint author), Anhui Med Univ, Sch Publ Hlth, 81 Meishan Rd, Hefei 230032, Anhui, Peoples R China.	fbtao@126.com			European Commission [015396]	This document is an output from the project 'Structural hinders to and promoters of good maternal care in rural China CHIMACA (015396)' funded by the European Commission INCO Program and coordinated by the National Research and Development Center for Welfare and Health, Helsinki. The authors of the paper are grateful to the Ministry of Health in the study counties for their support in the data co…		38	7	7	ELSEVIER SCI LTD	OXFORD	THE BOULEVARD, LANGFORD LANE, KIDLINGTON, OXFORD OX5 1GB, OXON, ENGLAND	0266-6138			MIDWIFERY	Midwifery	OCT	2011	27	5					707
J	Chen, YH; Watson, R				Chen Yanhua; Watson, Roger			A review of clinical competence assessment in nursing	NURSE EDUCATION TODAY			English	Review						Competence; Assessment; Nursing	STUDENT NURSES; PORTFOLIOS; PERFORMANCE; PERCEPTIONS; VALIDITY; MODEL	Aims: To investigate trends in the evaluation of clinical competence in nursing students and newly qualified nurses over the last 10 years. Design: A literature review following PRISMA guidelines. Methods: The following databases were searched: Cochrane, Medline and CINAHL using the terms competenc*, nurs* and assess*, evaluat*. measure*, from January 2001-March 2010. Strict inclusion and exclusi…	[Chen Yanhua] Affiliated Hosp, Luzhou Med Coll, Dept Infect Dis, Luzhou, Peoples R China; [Watson, Roger] Univ Sheffield, Sch Nursing & Midwifery, Sheffield S10 2TN, S Yorkshire, England	Chen, YH (reprint author), Affiliated Hosp, Luzhou Med Coll, Dept Infect Dis, Luzhou, Peoples R China.	chen_yanhua25@163.com	Watson, Roger/A-2969-2009	Watson, Roger/0000-0001-8040-7625				47	2	3	CHURCHILL LIVINGSTONE	EDINBURGH	JOURNAL PRODUCTION DEPT, ROBERT STEVENSON HOUSE, 1-3 BAXTERS PLACE, LEITH WALK, EDINBURGH EH1 3AF, MIDLOTHIAN, SCOTLAND	0260-6917			NURS EDUC TODAY	Nurse Educ. Today	NOV	2011	31	8					832
J	Cheung, NF; Zhang, LP; Mander, R; Xu, XF; Wang, XL				Cheung, Ngai Fen; Zhang, Liping; Mander, Rosemary; Xu, Xinfen; Wang, Xiaoli			Proposed continuing professional education programme for midwives in China: New mothers' and midwives' views	NURSE EDUCATION TODAY			English	Article						Chinese midwives; Continuing education; Self-directed learning; Profile		Background: Chinese midwifery is under threat and has been denigrated, with virtually all midwives practising in the labour wards. Aims: The present study aims to inform the development of a proposed continuing professional education programme. Method: Questionnaire surveys and semi-structured interviews were used to investigate the views of new mothers after vaginal births and midwives. The ques…	[Cheung, Ngai Fen; Zhang, Liping] Hangzhou Normal Univ, Coll Nursing, Hangzhou, Zhejiang, Peoples R China; [Mander, Rosemary] Univ Edinburgh, Sch Hlth, Edinburgh EH8 9YL, Midlothian, Scotland; [Xu, Xinfen] Zhejiang Univ, Zhejiang Womens Hosp, Dept Nursing, Hangzhou 310003, Zhejiang, Peoples R China; [Wang, Xiaoli] Hangzhou First Peoples Hosp, Dept Nursing, Hangzhou, Zhejiang, Peoples R China	Cheung, NF (reprint author), Hangzhou Normal Univ, Coll Nursing, Hangzhou, Zhejiang, Peoples R China.	nfcheung@btinternet.com; zip07065@yahoo.com.cn; R.Mander@ed.ac.uk; xuxinf@zju.edu.cn; 85989186@163.com						27	4	4	CHURCHILL LIVINGSTONE	EDINBURGH	JOURNAL PRODUCTION DEPT, ROBERT STEVENSON HOUSE, 1-3 BAXTERS PLACE, LEITH WALK, EDINBURGH EH1 3AF, MIDLOTHIAN, SCOTLAND	0260-6917			NURS EDUC TODAY	Nurse Educ. Today	JUL	2011	31	5					434
J	Wang, HH; Li, XH; Hu, XP; Chen, HH; Gao, YN; Zhao, HF; Huang, L				Wang, Honghong; Li, Xianhong; Hu, Xiaoping; Chen, Haihua; Gao, Yanna; Zhao, Huifang; Huang, Ling			Perceptions of nursing profession and learning experiences of male students in baccalaureate nursing program in Changsha, China	NURSE EDUCATION TODAY			English	Article						Male nursing student; Nursing education; Perception of nursing; Learning experience; Qualitative study	NURSES; BARRIERS	Using Colaizzi's framework, this qualitative study explored perceptions of the nursing profession and learning experiences of male students in a baccalaureate nursing program in Changsha, China. Data were collected through in-depth interviews on 14 subjects and analyzed with software Nvivo 8.0. Six theme clusters emerged as the following: (1) entering nursing field, (2) perceptions of nursing pro…	[Wang, Honghong; Li, Xianhong; Hu, Xiaoping; Gao, Yanna; Zhao, Huifang; Huang, Ling] Cent S Univ, Sch Nursing, Changsha 410013, Hunan, Peoples R China; Cent S Univ, Xiangya Hosp 3, Changsha 410013, Hunan, Peoples R China	Wang, HH (reprint author), Cent S Univ, Sch Nursing, 172 Tong Zi Po Rd, Changsha 410013, Hunan, Peoples R China.	honghong_wang@hotmail.com; tulip2282000@yahoo.com.cn; wgp2005a@163.com; zhf4311sd@sina.com; hlwmj16@163.com						28	8	9	CHURCHILL LIVINGSTONE	EDINBURGH	JOURNAL PRODUCTION DEPT, ROBERT STEVENSON HOUSE, 1-3 BAXTERS PLACE, LEITH WALK, EDINBURGH EH1 3AF, MIDLOTHIAN, SCOTLAND	0260-6917			NURS EDUC TODAY	Nurse Educ. Today	JAN	2011	31	1					36
J	Cai, CF; Zhou, ZK; Yu, LP; Wan, YH				Cai, Chunfeng; Zhou, Zongkui; Yu, Liping; Wan, Yonghui			Predictors of the health-related quality of life of patients who are newly diagnosed with lung cancer in China	NURSING & HEALTH SCIENCES			English	Article						health locus of control; health-related quality of life; lung cancer; social support	SOCIAL SUPPORT; BREAST-CANCER; LOCUS; QUESTIONNAIRE; CHEMOTHERAPY; DEPRESSION; SURVIVORS; SYMPTOMS; OPTIMISM; SURGERY	The purpose of this study was to explore the level and predictors of the health-related quality of life among patients who were newly diagnosed with lung cancer in China. A descriptive survey design was used to collect the data from 108 patients. The relationships among the variables were analyzed by using Pearson's correlation and multiple regression analyses. The results indicated that the pati…	[Cai, Chunfeng; Yu, Liping] Wuhan Univ, HOPE Sch Nursing, Wuhan 430079, Peoples R China; [Wan, Yonghui] Wuhan Univ, Dept Oncol, Renmin Hosp, Wuhan 430079, Peoples R China; [Cai, Chunfeng; Zhou, Zongkui] Cent China Normal Univ, Sch Psychol, Wuhan, Peoples R China	Cai, CF (reprint author), Wuhan Univ, HOPE Sch Nursing, Wuhan 430079, Peoples R China.	chunfengc01@yahoo.com.cn						36	2	2	WILEY-BLACKWELL	MALDEN	COMMERCE PLACE, 350 MAIN ST, MALDEN 02148, MA USA	1441-0745			NURS HEALTH SCI	Nurs. Health Sci.	SEP	2011	13	3					262
J	He, W; Xu, Y; Zhu, JH				He, Wei; Xu, Yu; Zhu, Jianhua			Bilingual teaching in nursing education in China: Evolution, status, and future directions	NURSING & HEALTH SCIENCES			English	Article						bilingual teaching; China; nursing; nursing education	ENGLISH; STUDENTS	Based on Chinese published literature and personal observations, this article reviews the history of bilingual teaching in nursing education in China, describes its current status and challenges, and predicts its future directions. Bilingual teaching in nursing education enjoys increasing popularity in China. The major factors that affect bilingual teaching are bilingual educators, students' Engl…	[He, Wei; Zhu, Jianhua] Nantong Univ, Sch Nursing, Nantong City, Jiangsu Prov, Peoples R China; [Xu, Yu] Univ Nevada, Sch Nursing, Las Vegas, NV 89154 USA	Zhu, JH (reprint author), Nantong Univ, Sch Nursing, 19 Qixiu Rd, Nantong City, Jiangsu Prov, Peoples R China.	zhujianhuantu@163.com						51	0	1	WILEY-BLACKWELL	MALDEN	COMMERCE PLACE, 350 MAIN ST, MALDEN 02148, MA USA	1441-0745			NURS HEALTH SCI	Nurs. Health Sci.	SEP	2011	13	3					371
J	Zeng, TY; Huang, HS; Zhao, MZ; Li, Y; Fang, PQ				Zeng Tieying; Huang Haishan; Zhao Meizhen; Li Yan; Fang Pengqian			Health professionals' attitude towards information disclosure to cancer patients in China	NURSING ETHICS			English	Article						cancer patient; health professionals; information disclosure; truth telling	JAPAN	A self-designed questionnaire was given to 634 health professionals in a large teaching hospital in Hubei Province in mainland China, to clarify the participants' attitude towards information disclosure to cancer patients. Statistic description was used to analyze the data. The item 'inappropriate information about cancer easily leads to medical disputes' scored highest at 3.86, while the scores …	[Zeng Tieying; Huang Haishan; Zhao Meizhen; Li Yan; Fang Pengqian] Huazhong Univ Sci & Technol, Tongji Med Coll, Tongji Hosp, Wuhan 430030, Hubei, Peoples R China	Fang, PQ (reprint author), Huazhong Univ Sci & Technol, Tongji Med Coll, Sch Med & Hlth Management, Wuhan 430030, Hubei, Peoples R China.	tyzeng@tjh.tjmu.edu.cn			Key Technologies R&D Program of Hubei Province in China [2005AA301C34]	The authors gratefully acknowledge the support and funding received from the Key Technologies R&D Program of Hubei Province in China (series number: 2005AA301C34). The authors also wish to thank the head nurses of the selected wards, who extended their assistance in data collection, and thank all the health professionals for their active participation in the study.		16	1	1	SAGE PUBLICATIONS LTD	LONDON	1 OLIVERS YARD, 55 CITY ROAD, LONDON EC1Y 1SP, ENGLAND	0969-7330	1477-0989		NURS ETHICS	Nurs. Ethics	MAY	2011	18	3					356
J	Li, LZ; Liu, F; Zhang, HL; Wang, L; Chen, XF				Li, Lezhi; Liu, Fang; Zhang, Huilin; Wang, Li; Chen, Xiaofang			Chinese Version of the Postpartum Depression Screening Scale Translation and Validation	NURSING RESEARCH			English	Article						Chinese; postpartum depression; psychometric testing; screening	POSTNATAL DEPRESSION; INSTRUMENTS; SAMPLE; INFANT; WOMEN	Background: Postpartum depression is an important public health problem in China. Although 10%-20% of Chinese women having recently given birth are affected by postpartum depression, only 10% receive treatment due to the lack of proper screening. Objectives: The aims of this study were to translate the Postpartum Depression Screening Scale into Chinese (C-PDSS) and establish the psychometric prop…	[Li, Lezhi; Liu, Fang; Zhang, Huilin; Wang, Li; Chen, Xiaofang] Cent S Univ, Xiangya Hosp 2, Changsha 410011, Hunan, Peoples R China	Li, LZ (reprint author), Cent S Univ, Xiangya Hosp 2, Changsha 410011, Hunan, Peoples R China.	lezhi6511@hotmail.com						33	3	3	LIPPINCOTT WILLIAMS & WILKINS	PHILADELPHIA	530 WALNUT ST, PHILADELPHIA, PA 19106-3621 USA	0029-6562			NURS RES	Nurs. Res.	JUL-AUG	2011	60	4					231
J	Wang, KF; Palmer, MH				Wang, Kefang; Palmer, Mary H.			Development and Validation of an Instrument to Assess Women's Toileting Behavior Related to Urinary Elimination	NURSING RESEARCH			English	Article						bladder health; instrument development; toileting behavior; urinary elimination	TRACT SYMPTOMS; CHILDREN; INCONTINENCE; PERSPECTIVE; DYSFUNCTION	Background: Toileting behaviors have been implicated in women's bladder health; however, the lack of a standardized instrument to explore variations in women's toileting behaviors has contributed to an incomplete understanding about the effects of these behaviors on bladder health. Objectives: The aims of this study were to develop and initially validate an instrument, the Web-based Toileting Beh…	[Wang, Kefang] Shandong Univ, Sch Nursing, Jinan 250012, Shandong, Peoples R China; [Palmer, Mary H.] Univ N Carolina, Sch Nursing, Chapel Hill, NC USA	Wang, KF (reprint author), Shandong Univ, Sch Nursing, Jinan 250012, Shandong, Peoples R China.	wangkf@sdu.edu.cn						39	3	5	LIPPINCOTT WILLIAMS & WILKINS	PHILADELPHIA	530 WALNUT ST, PHILADELPHIA, PA 19106-3621 USA	0029-6562			NURS RES	Nurs. Res.	MAY-JUN	2011	60	3					158
J	Wu, H; Ge, CX; Sun, W; Wang, JN; Wang, L				Wu, Hui; Ge, Cui Xia; Sun, Wei; Wang, Jia Na; Wang, Lie			Depressive Symptoms and Occupational Stress Among Chinese Female Nurses: The Mediating Effects of Social Support and Rational Coping	RESEARCH IN NURSING & HEALTH			English	Article						depressive symptoms; occupational stress; social support; rational coping; nurses	MENTAL-HEALTH; HOSPITAL NURSES; JOB-STRESS; DEMOGRAPHIC CHARACTERISTICS; WORKPLACE STRESSORS; KOREAN EMPLOYEES; WORK; SATISFACTION; PREDICTORS	The study reported here was designed to investigate the relationship between depressive symptoms and occupational stress in female nurses in China during the period June-July 2008. The hypothesis tested was that social support and rational coping would mediate the effects of occupational stress on depressive symptoms. Our structural equation modeling revealed that social support and rational copi…	[Wu, Hui; Ge, Cui Xia; Wang, Jia Na; Wang, Lie] China Med Univ, Dept Social Med, Sch Publ Hlth, Heping Dist 110001, Liaoning, Peoples R China; [Sun, Wei] China Med Univ, Dept Environm Hlth, Sch Publ Hlth, Heping Dist 110001, Liaoning, Peoples R China	Wang, L (reprint author), China Med Univ, Dept Social Med, Sch Publ Hlth, 92 Beier Rd, Heping Dist 110001, Liaoning, Peoples R China.							38	11	12	WILEY-BLACKWELL	MALDEN	COMMERCE PLACE, 350 MAIN ST, MALDEN 02148, MA USA	0160-6891			RES NURS HEALTH	Res. Nurs. Health	OCT	2011	34	5					401
J	Gao, LL; Ip, WY; Sun, K				Gao, Ling-Ling; Ip, Wan-Yim; Sun, Ke			Validation of the Short Form of the Chinese Childbirth Self-Efficacy Inventory in Mainland China	RESEARCH IN NURSING & HEALTH			English	Article						childbirth; Chinese; midwifery; self-efficacy; validity	LABOR; ANXIETY; WOMEN; SCALE; EXPECTANCIES; CONFIDENCE; PREGNANCY; BELIEFS; VERSION; SAMPLE	Self-efficacy increasingly has been reported as an important outcome measure in childbirth care. The purpose of this study was to evaluate the psychometrics of the short form of the Chinese Childbirth Self-Efficacy Inventory (CBSEI-C32) in mainland China. A convenience sample of 297 pregnant Chinese women who were attending the out-patient clinic of the study hospital in Guangzhou participated in…	[Gao, Ling-Ling] Sun Yat Sen Univ, Sch Nursing, Guangzhou 510089, Guangdong, Peoples R China; [Ip, Wan-Yim] Chinese Univ Hong Kong, Nethersole Sch Nursing, Shatin, Hong Kong, Peoples R China; [Sun, Ke] Sun Yat Sen Univ, Affiliated Hosp 3, Guangzhou 510089, Guangdong, Peoples R China	Gao, LL (reprint author), Sun Yat Sen Univ, Sch Nursing, 74,Zhongshan Rd 2, Guangzhou 510089, Guangdong, Peoples R China.		Ip, Wan Yim/D-5664-2015		Guangdong Science and Technology Department, China [2004B33801001]	This study was supported by a grant to the first author from Guangdong Science and Technology Department, China (No. 2004B33801001).		55	8	9	WILEY-BLACKWELL	HOBOKEN	111 RIVER ST, HOBOKEN 07030-5774, NJ USA	0160-6891	1098-240X		RES NURS HEALTH	Res. Nurs. Health	FEB	2011	34	1					49
J	Su, LX; Meng, K; Zhang, X; Wang, HJ; Yan, P; Jia, YH; Feng, D; Xie, LX				Su, Long-xiang; Meng, Kun; Zhang, Xin; Wang, Hui-juan; Yan, Peng; Jia, Yan-hong; Feng, Dan; Xie, Li-xin			DIAGNOSING VENTILATOR-ASSOCIATED PNEUMONIA IN CRITICALLY ILL PATIENTS WITH SEPSIS	AMERICAN JOURNAL OF CRITICAL CARE			English	Article							INTENSIVE-CARE UNITS; BRONCHOALVEOLAR LAVAGE FLUID; PULMONARY INFECTION SCORE; MYELOID CELLS-1; QUANTITATIVE CULTURES; PROGNOSTIC VALUE; CLINICAL-TRIALS; SEPTIC SHOCK; PROCALCITONIN; EPIDEMIOLOGY	Background Timely diagnosis and prognostic assessment of ventilator-associated pneumonia remain major challenges in critical care. Objective To explore the value of soluble triggering receptor expressed on myeloid cells 1, procalcitonin, and the Clinical Pulmonary Infection Score in the diagnosis and prognostic assessment of ventilator-associated pneumonia. Methods For 92 patients, bronchoalveola…	[Xie, Li-xin] Chinese Peoples Liberat Army Gen Hosp, Dept Resp Med, Sanya, Hainan Province, Peoples R China; [Su, Long-xiang; Wang, Hui-juan] Nankai Univ, Sch Med, Beijing, Peoples R China; [Zhang, Xin; Yan, Peng; Jia, Yan-hong] Chinese Peoples Liberat Army Gen Hosp, Dept Resp Dis, Beijing, Peoples R China; [Feng, Dan] Chinese Peoples Liberat Army Gen Hosp, Dept Med Stat, Beijing, Peoples R China…	Xie, LX (reprint author), Chinese Peoples Liberat Army Gen Hosp, Dept Resp Med, Sanya, Hainan Province, Peoples R China.	xielx@263.net			Chinese National Science and Technology Pillar Program [2009BAI86B03]	This work was supported by the Chinese National Science and Technology Pillar Program, No. 2009BAI86B03.		42	6	11	AMER ASSOC CRITICAL CARE NURSES	ALISO VIEJO	101 COLUMBIA, ALISO VIEJO, CA 92656 USA	1062-3264			AM J CRIT CARE	Am. J. Crit. Care	2015-11-01	2012	21	6					E110
J	Zhen, Y; Huang, ZQ; Jin, J; Deng, XY; Zhang, LP; Wang, JG				Zhen, Yan; Huang, Zhi-quan; Jin, Jing; Deng, Xiao-yan; Zhang, Li-ping; Wang, Jian-guang			Posttraumatic Stress Disorder of Red Cross Nurses in the Aftermath of the 2008 Wenchuan China Earthquake	ARCHIVES OF PSYCHIATRIC NURSING			English	Article							EMERGENCY SERVICES PERSONNEL; PSYCHOLOGICAL DISTRESS; TRAUMATIC STRESS; NATURAL DISASTER; RESCUE WORKERS; POLICE OFFICERS; RISK-FACTORS; SURVIVORS; TURKEY; MORBIDITY	This study investigated the symptoms, psychological distress characteristics, and related factors in China Red Cross disaster relief nurses following the 2008 Wenchuan Earthquake in China that began on May 12 and lasted to June 23, 2008. A sample of 210 exposed nurses and a reference group of 236 nonexposed Red Cross nurses were surveyed within 1 year after the catastrophic earthquake. They were …	[Wang, Jian-guang] Sun Yat Sen Univ, Sun Yat Sen Mem Hosp, Dept Oral & Maxillofacial Surg, Guangzhou 510120, Peoples R China; Sun Yat Sen Univ, Sch Publ Hlth, Guangzhou 510275, Guangdong, Peoples R China	Wang, JG (reprint author), Sun Yat Sen Univ, Sun Yat Sen Mem Hosp, Dept Oral & Maxillofacial Surg, 107 Yanjiang W Rd, Guangzhou 510120, Peoples R China.	wjgmin@hotmail.com						33	2	3	W B SAUNDERS CO-ELSEVIER INC	PHILADELPHIA	1600 JOHN F KENNEDY BOULEVARD, STE 1800, PHILADELPHIA, PA 19103-2899 USA	0883-9417			ARCH PSYCHIAT NURS	Arch. Psychiatr. Nurs.	FEB	2012	26	1					63
J	Cheng, F; Xu, Q; Dai, XD; Yang, LL				Cheng, Fang; Xu, Qin; Dai, Xiao-dong; Yang, Lin-li			Evaluation of the Expert Patient Program in a Chinese Population With Permanent Colostomy	CANCER NURSING			English	Article						Expert Patient Program; Permanent colostomy; Psychosocial adjustment; Self-efficacy; Self-management	RANDOMIZED CONTROLLED-TRIAL; QUALITY-OF-LIFE; SELF-EFFICACY; STOMA; ADJUSTMENT; MANAGEMENT; SURGERY	Background: A colostomy can negatively impact patients' quality of life. Recent research findings suggest that self-efficacy and psychosocial adjustment are positively associated with quality of life, but there are few research reports about the self-efficacy and psychosocial adjustment of patients with a permanent colostomy. Objectives: The objective of the study was to evaluate the effect of a …	[Xu, Qin] Nanjing Med Univ, Sch Nursing, Nanjing 210029, Jiangsu, Peoples R China; [Cheng, Fang] Nanjing Med Univ, Sch Nursing, Jiangsu Canc Hosp, Nanjing 210029, Jiangsu, Peoples R China; [Dai, Xiao-dong; Yang, Lin-li] Nanjing Med Univ, Affiliated Hosp 1, Dept Gen Surg, Nanjing 210029, Jiangsu, Peoples R China	Xu, Q (reprint author), Nanjing Med Univ, Sch Nursing, Hanzhong Rd 140, Nanjing 210029, Jiangsu, Peoples R China.	njxuqin@yahoo.com.cn			Nursing School of Nanjing Medical University	The study is funded by the Nursing School of Nanjing Medical University.		25	2	2	LIPPINCOTT WILLIAMS & WILKINS	PHILADELPHIA	530 WALNUT ST, PHILADELPHIA, PA 19106-3621 USA	0162-220X			CANCER NURS	Cancer Nurs.	JAN-FEB	2012	35	1					E27
J	Wang, LQ; Chien, WT; Lee, IYM				Wang, Li-Qun; Chien, Wai-Tong; Lee, Isabella Y. M.			An experimental study on the effectiveness of a mutual support group for family caregivers of a relative with dementia in mainland China	CONTEMPORARY NURSE			English	Article						experimental study; mutual support group; family caregivers; dementia; Chinese	QUALITY-OF-LIFE; ALZHEIMERS-DISEASE; CONTROLLED-TRIAL; STRATEGIES; PEOPLE; INTERVENTIONS; BURDEN; SCHIZOPHRENIA; GUIDELINES; SYMPTOMS	When caring for an older relative with dementia, family members experience considerable distress and burden. Literature reviews show that supportive group interventions for these caregivers have significant positive effects on improving their distress and quality of life, but not consistent and conclusive. Limited research is found in Asian populations. This study tested the effectiveness of a 12…	[Wang, Li-Qun] Jilin Med Coll, Sch Nursing, Jilin, Peoples R China; [Chien, Wai-Tong] Hong Kong Polytech Univ, Sch Nursing, Hong Kong, Hong Kong, Peoples R China; [Lee, Isabella Y. M.] Tuen Mun Hosp, Endoscop & Diagnost Unit, Hong Kong, Hong Kong, Peoples R China	Wang, LQ (reprint author), Jilin Med Coll, Sch Nursing, Jilin, Peoples R China.		Chien, Wai Tong/F-9604-2014	Chien, Wai Tong/0000-0001-5321-5791				43	4	4	ECONTENT MANAGEMENT	MALENY	PO BOX 1027, MALENY, QUEENSLAND 4552, AUSTRALIA	1037-6178			CONTEMP NURSE	Contemp. Nurse.	FEB	2012	40	2					210
J	Zhang, M; Jin, M; Yu, Y; Zhang, S; Wu, Y; Liu, H; Liu, H; Chen, B; Li, Q; Ma, X; Chen, K				Zhang, M.; Jin, M.; Yu, Y.; Zhang, S.; Wu, Y.; Liu, H.; Liu, H.; Chen, B.; Li, Q.; Ma, X.; Chen, K.			Associations of miRNA polymorphisms and female physiological characteristics with breast cancer risk in Chinese population	EUROPEAN JOURNAL OF CANCER CARE			English	Article						miRNA; SNPs; physiological characteristics; breast cancer; risk	SQUAMOUS-CELL CARCINOMA; LUNG-CANCER; GENETIC-VARIANTS; TUMOR-SUPPRESSOR; CARCINOGENESIS; EPIDEMIOLOGY; EXPRESSION; PROGNOSIS; TARGETS; MIR-27A	mircoRNAs (miRNAs) play important roles on regulation of gene expressions. Aberrant expression of miRNAs was involved in various biological and pathological processes, including tumorigenesis of breast cancer. Single-nucleotide polymorphisms (SNPs) were implicated in altered expression or biological functions of mature miRNAs. To explore the relevance of miRNA polymorphisms and female physiologic…	[Chen, K.] Zhejiang Univ, Sch Med, Dept Epidemiol & Hlth Stat, Coll Publ Hlth, Hangzhou 310058, Zhejiang, Peoples R China; [Li, Q.; Ma, X.] Inst Canc Prevent Jiashan Cty, Jiashan, Zhejiang, Peoples R China	Chen, K (reprint author), Zhejiang Univ, Sch Med, Dept Epidemiol & Hlth Stat, Coll Publ Hlth, 388 Yuhang Tang Rd, Hangzhou 310058, Zhejiang, Peoples R China.	ck@zju.edu.cn			National Natural Science Foundation of China [81072356, 30872177]; National Research Foundation for the Doctoral Program of Higher Education of China [20090101110113]	This study was supported by National Natural Science Foundation of China (No. 81072356), National Natural Science Foundation of China (No. 30872177) and The National Research Foundation for the Doctoral Program of Higher Education of China (NO. 20090101110113).		38	33	34	WILEY-BLACKWELL	MALDEN	COMMERCE PLACE, 350 MAIN ST, MALDEN 02148, MA USA	0961-5423			EUR J CANCER CARE	Eur. J. Cancer Care	MAR	2012	21	2					274
J	Zhen, Y; Wang, JG; Tao, D; Wang, HJ; Chen, WL				Zhen, Yan; Wang, Jian-guang; Tao, Duo; Wang, Hua-Jun; Chen, Wei-Liang			Efficacy survey of swallowing function and quality of life in response to therapeutic intervention following rehabilitation treatment in dysphagic tongue cancer patients	EUROPEAN JOURNAL OF ONCOLOGY NURSING			English	Article						Dysphagia; Tongue resection and rehabilitation; Swallowing training; Quality of life; Oral cancer; Screening tool; Swallowing function	PRIMARY MOTOR CORTEX; NECK-CANCER; QUESTIONNAIRE; CHEMOTHERAPY; OUTCOMES; HEAD	Purpose: This quasi-experimental parallel cluster study was carried out to investigate the utility of interdisciplinary swallowing therapy exercises in improving swallowing function and quality of life (QOL) in dysphagic cancer patients following tongue resection and subsequent rehabilitation treatment. Methods: All subjects in the experimental group underwent a structured swallowing training pro…	[Zhen, Yan; Wang, Jian-guang; Chen, Wei-Liang] Sun Yat Sen Univ, Affiliated Hosp 2, Sun Yet Sen Mem Hosp, Dept Oral & Maxillofacial Surg, Guangzhou 510120, Guangdong, Peoples R China; [Tao, Duo] Sun Yat Sen Univ, Affiliated Hosp 2, Sun Yet Sen Mem Hosp, Dept Otolaryngol Surg, Guangzhou 510120, Guangdong, Peoples R China; [Wang, Hua-Jun] Guangdong Prov Peoples Hosp, Dept Nurses Management, Guangzh…	Chen, WL (reprint author), Sun Yat Sen Univ, Affiliated Hosp 2, Sun Yet Sen Mem Hosp, Dept Oral & Maxillofacial Surg, 107 Yan Jiang Rd, Guangzhou 510120, Guangdong, Peoples R China.	drchen@vip.163.com						17	10	10	ELSEVIER SCI LTD	OXFORD	THE BOULEVARD, LANGFORD LANE, KIDLINGTON, OXFORD OX5 1GB, OXON, ENGLAND	1462-3889			EUR J ONCOL NURS	Eur. J. Oncol. Nurs.	FEB	2012	16	1					54
J	Huang, LY; Ma, BW; He, F; Yang, SQ				Huang, LiYa; Ma, BinWu; He, Fang; Yang, ShaoQi			Electrocardiographic, Cardiac Enzymes, and Magnesium in Patients With Severe Acute Pancreatitis	GASTROENTEROLOGY NURSING			English	Article							ORGAN-FAILURE; NECROTIZING PANCREATITIS; CLASSIFICATION-SYSTEM; MYOCARDIAL-INFARCTION; INTENSIVE-CARE; EARLY DEATH; APACHE-II; MORTALITY; NECROSIS; INJURY	Severe acute pancreatitis (SAP) can lead to multiple-organ dysfunction syndrome (MODS). Electrocardiographic (ECG), cardiac enzyme, and serum magnesium abnormalities occur after SAP. Electrocardiographic and cardiac enzyme abnormalities are described as variables in SAP patients, which contribute to the effects of MODS. Hypomagnesium is also closely associated with ECG abnormalities; therefore, h…	[Ma, BinWu] NingXia Med Univ, Affiliated Hosp, Dept Neurol, Yinchuan, Peoples R China; [Huang, LiYa; He, Fang; Yang, ShaoQi] NingXia Med Univ, Affiliated Hosp, Dept Gastroenterol, Yinchuan, Peoples R China	Ma, BW (reprint author), NingXia Med Univ, Affiliated Hosp, Dept Neurol, Yinchuan, Peoples R China.	nxmbw@126.com						28	0	0	LIPPINCOTT WILLIAMS & WILKINS	PHILADELPHIA	530 WALNUT ST, PHILADELPHIA, PA 19106-3621 USA	1042-895X			GASTROENTEROL NURS	Gastroenterol. Nurs.	JUL-AUG	2012	35	4					256
J	Ren, K; Qiu, JB; Wang, XH; Niu, FL; Jiang, TB				Ren, Kai; Qiu, Jingbo; Wang, Xiaohua; Niu, Fenglin; Jiang, Tingbo			The Effect of a Sweet Potato, Footbath, and Acupressure Intervention in Preventing Constipation in Hospitalized Patients With Acute Coronary Syndromes	GASTROENTEROLOGY NURSING			English	Article							CANCER; MANAGEMENT	Constipation is a common health problem that adversely affects quality of life and the prognosis of hospitalized patients with acute coronary syndromes (ACS). The purpose of this study was to develop and test the sweet potato/footbath/acupressure massage (SFA) intervention as a safe treatment for prevention of constipation and to increase satisfaction with bowel emptying in hospitalized patients …	[Ren, Kai; Qiu, Jingbo; Wang, Xiaohua; Niu, Fenglin] Soochow Univ, Coll Nursing, Suzhou, Jiangsu, Peoples R China; [Wang, Xiaohua; Jiang, Tingbo] Soochow Univ, Affiliated Hosp 1, Cardiovasc Dept, Suzhou, Jiangsu, Peoples R China	Wang, XH (reprint author), Soochow Univ, Coll Nursing, Mailbox 203,Main Campus,1 Shizi St, Suzhou, Jiangsu, Peoples R China.	sxwang2001@gmail.com						25	1	1	LIPPINCOTT WILLIAMS & WILKINS	PHILADELPHIA	530 WALNUT ST, PHILADELPHIA, PA 19106-3621 USA	1042-895X			GASTROENTEROL NURS	Gastroenterol. Nurs.	JUL-AUG	2012	35	4					271
[truncated: 180 more rows]
[truncated: 10 more columns]

## Sheet: Taiwan(1506)
PT	AU	BA	BE	GP	AF	BF	CA	TI	SO	SE	BS	LA	DT	CT	CY	CL	SP	HO	DE	ID	AB	C1	RP	EM	RI	OI	FU	FX	CR	NR	TC	Z9	PU	PI	PA	SN	EI	BN	J9	JI	PD	PY	VL	IS	PN	SU	SI	MA	BP
[truncated: 1,506 more rows]
[truncated: 10 more columns]

## Sheet: Hong Kong(495)
PT	AU	BA	BE	GP	AF	BF	CA	TI	SO	SE	BS	LA	DT	CT	CY	CL	SP	HO	DE	ID	AB	C1	RP	EM	RI	OI	FU	FX	CR	NR	TC	Z9	PU	PI	PA	SN	EI	BN	J9	JI	PD	PY	VL	IS	PN	SU	SI	MA	BP
[truncated: 495 more rows]
[truncated: 10 more columns]

## Sheet: Data analysis
The number of pulications：
	Mainland	Taiwan	Hong Kong	Total
2005	2	68	35	105
2006	1	57	37	95
2007	10	91	46	147
2008	17	135	48	200
2009	34	168	44	246
2010	45	209	65	319
2011	52	210	48	310
2012	69	177	60	306
2013	89	196	62	347
2014	119	195	50	364
Total	438	1506	495	2439
%	0.179582	0.617466	0.202952
p	0	0.001	0.017	0
Fold	59.5	2.86765	1.42857	3.46667
Total citations							Total impact factors
	Mainland	Taiwan	Hong Kong					Mainland	Taiwan	Hong Kong
2005	28	950	607				2005	3.707	104.804	50.167
2006	28	732	436				2006	1.255	98.217	57.638
2007	174	1040	609				2007	13.52	136.656	71.057
2008	151	1417	577				2008	21.527	200.383	69.329
[truncated: 267 more rows]
